# Supplementary material for: Ever-Adapting RND Efflux Pumps in Gram-Negative Multidrug-Resistant Pathogens: A Race against Time
Source: MDPI journal article supplement (doi:10.3390/antibiotics10070774), 2021-06-24
Supplement: s1 [file s1]

### Data S1: Sequences of 135 MDR-type RND pumps.

>AcrB\_E\_coli

MPNFFIDRPIFAWVIAIIIMLAGGLAILKLPVAQYPTIAPPAVTISASYPGADAKTVQDVTQVIEQNMNGIDNLMYMSSNS  
DSTGTVQITLTFESGTDADIAQVQVQNKQLQAMPPLLPQEVQQQGVSVESKSSSSFLMVVGVIINTDGMTQEDISDYVAA  
NMKDAISRTSGVGDVQLFGSQYAMRIWMNPNELNKFQLTPVDVITAIKAQNAQVAAGQLGGTTPPVKGQQQLNASIIAQ  
TRLTSTEEFGKILLKVNQDGSRVLLRDVAKIELGGENYDIIAEFNGQPASGLGIKLATGANALDTAAAIRAELAKMEPFFPSG  
LKIVYPYDTTPFVKISIHVVKTLVEAIIIVFLVMYFLQNFRAITLIPTIAVPVLLGTFVLAAGFSINTLTMFGMVLAIGLLVD  
DAIVVVENVERVMAEEGLPPKEATRKSMMGQIQGALVGIAMVLSAVFVPMMAFFGGSTGAIYRQFSITIVSAMALSVLVALILT  
PALCATMLKPIAKGDHGEKKGFFGWFNRMFEKSTHHTDSVGGILRSTGRYLVLYLIIVVGMAYLFVRLPSSFLPDEDQG  
VFMTMVQLPAGATQERTQKVLNEVTHYYLTKEKNNVESVFAVNGFGFAGRGQNTGIAFVSLKDWADRPGEENKVEAIT  
MRATRAFSQIKDAMVFAFNLPAILVELGTATGDFELIDQAGLGHEKLTQARNQLLAEAAKHPDMLTSVRPNGLDTPQFK  
IDIDQEKAQALGVSIINDINTTLGAAGGSYVNDFIDRGRVKKVYVMSEAKYRMLPDDIGDWYVRAADGQMVPFSAFSS  
SRWEYGSPLRLERYNGLPSMEILGQAAPGKSTGEAMELMEQLASKLPTGVGYDWTGMSYQERLSGNQAPSLYASLIVVFL  
CLAALYESWSIPFSVMLVVPLGVIGALLAATFRGLTNDVYFQVGLLTTIGLSAKNAILIVEFAKDLMDKEGKGLIEATLDAVR  
MRLRPILMTSLAFILGVMPLVISTGAGSGAQNAVGTGVMGGMVTATVLAIFFVPVFFVVRRRFSRKNEDIEHSHTVDHH

>AcrF\_E\_coli

MANFFIRRIFAWVLAIIIMMAGALAILQLPVAQYPTIAPPAVSVSANYPGADAQTVQDVTQVIEQNMNGIDNLMYMS  
STSDSAGSVTITLTFQSGTDPDIAQVQVQNKQLLATPLLPQEVQQQGISVEKSSSSYLMVAGFVSDNP GTTQDDISDYVA  
SNVKDTLSRLNGVGDVQLFGAQYAMRIWLDADLLNKYKLTTPVDVINQLKVQNDQIAAGQLGGTPALPGQQQLNASIIAQ  
TRFKNPPEFGKVTLRVNSDGSVVRLKDVARVELGGENYNVIARINGKPAAGLGKILATGANALDTAKAIKAKLAELQPPFP  
QGMKVLYPYDTTPFVQLSIHEVVKTLFEAIMLVFLVMYFLQNMRAITLIPTIAVPVLLGTFAILAAGFSINTLTMFGMVLA  
IGLLVDDAIVVVENVERVMMEDKLPPKEATEKSMSQIQGALVGIAMVLSAVFIPMAFFGGSTGAIYRQFSITIVSAMALSVL  
VALILTPALCATLLKPVSAAHHENKGGFFGWNTTFDHSVNHYTNSVGKILGSTGRYLLIYALIVAGMVVFLRLPSSFLPEE  
DQGVFLTMIQLPAGATQERTQKVLQDQVTDYYLKNEKANVESVFTVNGFSFSGQAQNAAGMAFVSLKPWEERNNGDENSE  
EAVIHRAKMELGKIRDGFVIPFNMPAIVELGTATGDFELIDQAGLGHDALTQARNQLLGMAAQPASLVSVRPNGLDTP  
AQFKLEVDQEKAQALGVSLSDINQITISTALGGTYVNDFIDRGRVKKLYVQADAKFRMLPEDVDKLYVRSANGEMVPFSAF  
TTSHWVYGSPLRLERYNGLPSMEIQGEAAPGTSSGDAMALMENLASKLPAGIGYDWTGMSYQERLSGNQAPALVAISFV  
VFLCLAALYESWSIPVSVMLVVPLGIVGVLLAATLFNQKNDVYFMVGLLTTIGLSAKNAILIVEFAKDLMEKEGKGVVEAT  
LMAVRMRLRPILMTSLAFILGVPLAISNGAGSGAQNAVIGVMGGMVSATLLAIFFVPVFFVVRRCFKG

>AcrD\_E\_coli

MANFFIDRPIFAWVLAIIILLCTGLAIFSLPVEQYPDAPPNVRVTANYPGASAQTLENTVTQVIEQNMGTGLDNLMYMSS  
QSSGTGQASVTLFSKAGTDPDEAVQQVQVQNLQSAMRKLPAVQVQVTVRKTGDTNLTIAFVSTDGSMQDIADY  
VASNIQDPLSRVNGVGDIDAYGSQYSMRIWLDPAKLNSFQMTAKDVTDIAESQNAQIAVGQLGGTPSVDKQALNATIN  
AQSLQTPEQFRDITLRVNQDGSSEVRLGDVATVEMGAKEYDYLSRFNGKPASGLGVKLASGANEMATAELVLNRLDELA  
QYFPHGLEKAYETTSFVKASIEDVVKTLLEAIALVFLVMYFLQNFRAITLIPTIAVPVLMGTFSVLYAFGYSVNTLTMFA  
MVLAIGLLVDDAIVVVENVERIMSEGLTPREATRKSMMGQIQGALVGIAMVLSAVFVPMMAFFGGTTGAIYRQFSITIVAAM  
VLSVLVAMILTPALCATLLKPLKKGEHHGQKGFFAWFNQMFNRNAERYEKGVAKILHRSLRWIVYVLLLGGMVFLRLP  
TSFLPLEDRGMFTTSVQLPSGSTQQQTLKVVEQIEKYFTHEKDNIMSVFATVSGSPGGNGQNVARMFIRLKDWSERDS  
KTGTSFAIERATKAFNQIKEARVIASSPPAISGLSSAGFDMELQDHAGAGHDALMAARNQLLALAAENPELTRVRHNG  
LDDSPQLQIDIDQRKAQALGVAIDDINDTLQTAWGSSYVNDFMDRGRVKKVYVQAAAPYRMLPDDINLWYVRNKDGG  
MVPFSAFATSRWETGSPRLERYNGYSAVEIVGEAAPGVSTGTAMDIMESLVKQLPNGFGLWTAMSYQERLSGAQAPAL  
YAILLVFLCLAALYESWSVPFSVMLVVPLGVIGALLATWMRGLENDVYFQVGLLTVIGLSAKNAILIVEFANEMNQKGH  
DLFEATLHACRQRLRPILMTSLAFIFGVLPMTSTGAGSGGQHAVGTGVMGGMISATILAIYFVPLFFVLVRRRFLKPRPE

>MexB\_P\_aeruginosa

MSKFFIDRPIFAWVIALVIMLAGGLSILSLPVNQYPAIAPPAIAVQVSYPGASAETVQDTVVQVIEQQMNGIDNLRYSISSES  
NSDGSMTITVTFEQGTDPDIAQVQVQNKQLQATPLLPQEVQRQGIRVTKAVKNFLMVVGWVSTDGSMTKEDLSNYIVSN  
IQDPLSRTKGVGDFQVFGSQYSMRIWLDPAKLNSYQLTPGDVSSAIQAQNVQISSGQLGGLPVAVKGQQLNATIIGKTRL  
QTAEQFENILLKVNPDGSQVRLKDVADVGLGGQDYSINAQFNGSPASGIAIKLATGANALDTAKAIRQTIANLEPFMPQG  
MKVVYPYDTPVVSASIEHVVKTLGEAILLVFLVMYFLQNFRATLIPTIAVPVLLGTFGVLAAFGFSINTLTMFGMVLAIGL  
LVDDAIVVVENVVERVMAEEGLSPREAARKSMGQIQGALVGIAMVLSAVFLPMAFFGGSTGVIYRQFSITIVSAMALSVIVA  
LILTPALCATMLKPIEKGDHGEHKGGFFGWFNRMFLSTTHGYERGVASILKHRAPYLLIYVVIVAGMIWMFTRIPTAFLPDE  
DQGVLFQVQTPPGSSAERTQVVVDSMREYLLEKESSSVSVFTVTGFNFAGRGQSSGMAFIMLKPWEERPGENSVFE  
LAKRAQMHFFSFKDAMVFAPPSVLELGNATGFDLFLQDQAGVGHEVLLQARNKFLMLAAQNPAQVRPNMGMSDE  
PQYKLEIDDEKASALGVSLADINSTVSIWAGSSYVNDFIDRGRVVKRYVLQGRPDARMNPDDLKWKYVRNDKGEMVPFN  
AFATGKWEYGSPKLERNGVPAMEILGEPAPGLSSGDAMAAVEEIVKQLPKGVGYSWTGLSYEERLSGSQAPALYALSLL  
VVFLCLAALYESWSIPFSVMLVPLGVIGALLATSMRGLSNDVFFQVGLTTIGLSAKNAILIVEFAKELHEQGKGIVEAAIEA  
CRMRLRPIVMTSLAFILGVVPLAISTGAGSGSQHAIGTGVIGGMVTATVLAIFWVPLFYVAVSTLFKDEASKQQASVEKGQ

>MexY\_P\_aeruginosa

MARFFIDRPVFAWVISLLIVLAGVLAIRFLPVAQYPDIAPPVNVNSASYPGASAKVVEEAVTAIIEREMNGAPGLLYTKATSS  
TGQASLTLTRQGVNADLAAVEVQNRLKIVESRLPESVRRDGIYVEKAADSIQLIVTLTSSSGRYDAMELGEIASSNVLQAL  
RRVEGVGKVETWGAEYAMRIWPDPAKLTSMNLSASDLVNAVRRHNARLTVDIGNLGVPSAPISATVKVDDTLVTP  
QFGEIPLRIRADGGAIRLRDVARVEFGQSEYGFVSRVNQMTATGLAVKMAPGSNAVATAKRIRATLDELSRYFPEGVSINI  
PYDTSFAVEISIRKVSTLLEAMLLVFVAVMYLFMQNFRATLIPTLVVPVALLGTFTVMLGLGFSINVLTMFGMVLAIGLVDD  
AIIVVENVVERLMAEEGLSPHDATVKAMRQISGAIVGITVVLVSFVPMAPFFSGAVGNIYRQFAVTLAVSIGFSAFLALSPTA  
LCATLLRPIDADHHEKRGFFGWFNRAFLRLTGRYRNAVAGILARPIRWMLVYTLVIGVVALLFVRLPQAFLEEDQGD  
FMI  
MVMQPEGTPMAETMANVGDVERYLAHEPVAYAYAVGGFSLYGDTSSAMIFATLKDWSEERASQHVGAIVERINQ  
RFAGLPNRTVYAMNSPPLDLGSTSGDFRLQDRGGVGYEALVKARDQLLARAAEDPRLANVMFAGQGEAPQIRLDIDR  
RKAETLGVSMDINTTILAVMFGSDYIGDFMHGSQVRKVVVQADGAKRLGIDDIGRLHVRNEQGEMVPLATFAKAAWTL  
GPPQLTRYNGYPSFNLEGQAAPGYSSGEAMQAMEQLMQGLPEGIAHEWWSGQSFEERLSGAQAPALFALSVLIVFLALAA  
LYESWSIPLAVILVPLGVLGALLGVSLRGLPNDIYFKVGLITIIGLSAKNAILIEVAKDHYQEGMSLLQATLEAARLRLRP  
IVMTSLAFGFGVVPLALSSGAGSGAQVAIGTGVLGIVTATVLAVFLVPLFFLVVGRFLRLKAPRTGNSPQIPTEQA

>MexD\_P\_aeruginosa

MSEFFIKRPNFAWVVALFISLAGLLVISKLPVAQYPNVAPPQITITATYPGASAKVLVDSVTSVLEESLNGAKGLLYFESTNNS  
NGTAEIVVTFEPTGDPDLAQVDVQNRLKKAEARMPQAVLTQGLQVEQTSAGFLLIYALSYKEGAQRSDTTALGDYAARN  
INNELRRLPGVGKLQFFSSEAMRVWIDPQKLVGFLSIDDVSNAIRGQNVQVPAGAFGSAPGSSAQELTATLAVKGTLD  
DPQEFQGVVLRANEDGSLVRLADVARLELGKESYNISRLNGTPTVGGAIQLSPGANAIQTATLVKQRLAELSAFFPEDM  
QYSVPYDTSRFVDVAIEKVIHTLIEAMVLVFLVMFLFLQNVRITLPSIVVPVCLLGTLMVMYLLGFSVNMMTMFGMVLA  
GILVDDAIVVVENVVERIMAEEGISPAEATVKAMKQVSGAIVGITLVLSAVFLPLAFMAGSVGVYQQFSVSLAVSILFSGFLA  
LTFTPALCATLLKPIEGHHEKRGFFGAFNRGFARVTERYSLNLSKLVARAGRFMLVYAGLVAMLGYFYRLRPEAFVPAEDL  
GYMVVDVQLPPGASRVRTDATGEELERFLKSREAVASVFLISGFSFGQGDNAALAFPTFKDWSERGAEQSAAAEIAALN  
EHFALPDDGTVMVAVSPPPINGLGNSSGFALRLMDRSGVGREALLQARDTLLGEIQTNPKFLYAMMEGLAEAPQLRLLIDR  
EKARALGVSFETISGTLAAFGSEVINDFTNAGRQQRVVIQAEQGNRMTPESVLELYVPNAAGNLVPLSAFVSVKWEEGP  
VQLVRYNGYPSIRIVGDAAPGFSTGEAMAEMERLASQLPAGIGYEWTLGLSYQEKVSAGQATSLFALAILVVFLLLVALYES  
WSIPLSVMLIVPIGAIGAVLAVMVSGMSNDVYFKVGLITIIGLSAKNAILIVEFAKELWEQGHSLRDAAIEAARLRFRIIMTS  
MAFILGVIPLALASGAGAASQRAIGTGVIGGMLSATFLGVLFVPICFVWLLSLLRSKPAPIEQAASAGE

>MexQ\_P\_aeruginosa

MTFPRFFIDRPIFAIVLSVLMIGGIVSFFQLPLSEYPAVTPPTVQVTTAYPGANPDVIAQTVATPLEQAITGVEGMLYMSS  
QSATDGRMILTITFDQHIDPDMAQIQVQNRVSRVLSRLPDEVQRQGVVTQKTSPDILMVVHLLSPEQRYDPLYISNYAYL  
QVRDELLRLPGISDVVVWGAGEYSMRLWLDPDLIAARGLTAGEVIAAVREQNVQVAAGAVGQAPDSTAAFQVTVNTL  
GRLSDEEQFGDIIVRTGADGQVTRLRDVARIEMGGDAYALRSLLDGEPVALQIIQSPGANALDTAEAVRATVARLEGNF  
PAGLSARIAYPDPTVFRASLQTVATTLEAILLVVVVVVFLRSWRASLIPLMAVPVSLVGTFAVMHLMGFSLNTLSLFGVLV  
SIGIVDDAIVVENVERHIENGEPPLQAARRAMDEVTGPIMAITSVLAAVFIPTAFLSGLQGEFYRQFALTIAISTILSALNSL  
TLSPALAGLLLRPRPAGGAVAGRFRQLLQVLGRPLRNAPEAYGNAVRKVVVSGLALVVYGGLLGLTWVGFQAVPPGFV  
PMQDKYYLVGIAQLPNGASLERTDAVVRQMSRIGLDEPGVESVVAFFGLSVNGFVNPNAAVMFFMLDPFESRTSADL  
GALAIAGRLQARFASIPDGLGVFPPPPVPLGTIGGFKMQVEDRGGAGLEALARQTQVLMMKATESGQLGGLMTSFDI  
NAPQLEVVDRTKVKSQGVRLADVFEALQVYLGSLYINDFNFRGRTYKVTAQADAPHRMQAEIGRLQVRNAAGAMLP  
LSSFVTVPSSGPDRVIHYNGYPSADISGGALPGVSSGQAVALMERLAGEVLPEGMTFEWTDLTYYQQKLAGNSALFIFPLC  
VLLAYLILAAQYNSWLLPLAVLLIVPMCLLSAIAGVWLVGDDNNVVFQIGLVVLVGLAAKNAILLIVEFARTLEAEGARALEA  
VVEACRLRLRPILMTSLAFIAGVVPLVMASGAGAEMRQAMGVAVFAGMLGVTLFGLFLTPVFYVLVRLAARLERRAGGS  
LAHLEGGRP

>MexF\_P\_aeruginosa

MNFSQFFIQRPIFAAVLSLLILIGGAISLFQLPISEYPEVVPPTVVVRANFPGANPKVIGETVASPLEQAITGVENMLYMSSQS  
TSDGKLTLTITFALGTDLDNAQVQVQNRVTRTEPKLPEEVTRLGITVDKASPDLTMMVHLTSPDNRYDMLYLSNYAVLNV  
KDELARLDGVDGVQLFGLGDYSLRVWLDPNKVASRNLATDVVNAIREQNRQVAAGTLGAPPAPSDTSFQLSINTQGR  
LVTEEEFENIIRAGANGEITRLRDIARVELGSNQYALRSLLNNKPAVAIPIFQRPGSNAIEISNLVREKMAELKHSFPQGM DY  
SIVYDPTIFVRGSIEAVVHTLFEALVLVVLVVLFLQTWASIIPLAAVPVSLIGTFAVMHMLGFSLNALSFLGLVLAIGIVDD  
AIVVVENVERNIGLGLKPV EATKRAMREVTGP IIATALVLCAVFIPTAFISGLTGQFYRQFALTIAISTVISAFNSLTLPALAAV  
LLKGHHPEPKDRFSVFLDKLLGSWLF RPFNRFFDRASHGYVGT VNRVLRGSSIALLVYGGMLVLT YFGFSSTPTGFVPQQDK  
QYLVAFAQLPDAASLDRTEAVIKQMSEIALAQPGVADSVAFPGLSINGFTNSPNSGIVFTPLKPFDERKDPSQSAGAIAAA  
LNAKYADIQDAYIAIFPPPPVQGLGTIGGFRLQIEDRGNQGYEELFKQTQNIITKARALPELEPSSVFSSYQVNVVPQIDADID  
REKAKTHGVAISDIFDTLQVYLGSLYANDFNRFGRTYQVNVQAEQQFRLEPEQIGQLKVRNNLGEMVPLASFIKVS DTS  
PDRVMHYNGFITAE LNGAPAAGYSSGQAQAAIEKLLKEELPNGMTYEWTELTYYQILAGNTALFVFP LCVLLAFLVLAAQ  
YESWSLPLAVILVPM TLLSAITGVILAGSDNNIFTQIGLIVLVGLACKNAILLIVEFAKDKQEEGMDRVA AVLEACRLRLRPILM  
TSIAFIMGVVPLVISTGAGAEMRHAMGVAVFSGMIGVTFFGLLLTPVFYVLIRRFVENREARRAANDKGLPEVHA

>MexW\_P\_aeruginosa

MAFTDPFIRRPVLASVSVLLIVLLGMQAFSKLVIREYPQMENALITVTTLYAGANAETIQGYITQPLQQSLASAEGIDYMTSV  
SRQNYSTISIYARIGANTDRLVTELLAKSNEVKSQ LPPDAEDPVLQKEAADASALMYISFYSEQMNNPQITDYLSRVIQPKL  
ATLPGIAEAEILGNQVFAMRLWLDPVKMAAFGVTAGEINQAVQQYNFLAAAGEVKGQLVVTSVNASTDLKSPQAFAAIP  
VKTDGDRRVLMGDVARVELGAASYDAISSFN GIPSVYIGIKGTPSANPLDVIKEVRAKMPELEEQLPPNLKVSIA YDATRFI  
QASIDEVVKTLGEAVLIVIVVFLFLGAFRSVLIPVVTIPLSMIGVLFFMQAMGYSINLLTLLAMVLAIGLVDDAIVVVENIHR  
HIEEGKPPFEAALEGAREIAVPVVSMTITLAAVYAPIGFLTGLTGALFKEFAFTLAGAVIISGIVALTLSPMMCSRLLRHEENPS  
GLAHRDLIFEGLKQRYQRALHGTLDTRPVVLVFAVLVLALIPVLLMFTKKELAPEEDQGIVFLMTNSPQTANLDYLNRYTA  
EFEGIFRSFPEYSAFQINGYNGVQAGIGGMLLKPWDEREKSQMELLHAVQAKLNEIPGVQIFAFNLPSLPGTGEGLPFQF  
VLNTANDYESLLQVAQRVKQRASESGKFAFLDLDLAFDKPELVVDIDREKAAQMGVSMQDLGVALASLLGEGEINRFTID  
GRSYKVIAQVERPYRDNPGWLGSYYVKS RNGQLVALSTLIETHERARPRQLNQFQQLNSAIISGFPIVSMGEAIETVQQIA  
REEAPRGFAVDYAGASRQYVQEGSALLVTFLALAIIFVLAAQFESFRDPLVIMVTVPLSICGALIPFLGVSSLNIYTQVGL  
VTLIGLISKHGILIVEFANQLRHEQGLGRREAIEQAAAIRLPVLMTTAAMVLGVIP LILATGAGAVSRFDIGIVIATGMSVGT  
LFTLFVLP CIYTLVARPDAPPGV TQAANAH

>MexI\_P\_aeruginosa

MTFTDLFVRRPVLALVVSTLILLGLFSLGKLPIRQYPLLESSTITVTTEYPGASADLMQGFVTQPIAQAVSSVEGIDYLSSTSV  
QGRSVVTIRMILLNRDSTQAMTETMAKVNSVRYKLPERAYDSVIERSSGETTAVAYVGFSSKTLPIPALTDYLSRVVPMFSS  
IDGVAKVQTFGGQRLAMRLWLDADRLAGRGLTASDVAAEIRRNYYQAAPGMVKGQYVLSNVRVNTDLTNVDDFRE  
VIRNDGNGLVRLRDVGTVELGAAATETSALMDGDPAVHLGLFPTPTGNPLVIVDGIKLLPEIQKTLPPDVVRVDLAYETSRF  
IQASIDEVVRTLVEALLIVVLVIYLCGLSRVLPVATIPLSMLGAAALMLAFGFSVNLTLTLLAMVLAIGLVVDDAIVVVENVH  
RHIEEGKSPVAAALIGAREVAGPVIAMTITLAAVYTPIGLMGGLTGALFREFALTLAGAVIVSGVVALTLPVMSLLQAHQ  
NEGRMGRAAEWFFGGLTRRYGQVLEFSLGHRWLTGGLALLVCISLPLLYSMPKRELAPTEDQAAVLTAIKAPQHANLDYV  
ELFARKLDQVYTSIPETVSTWIINGTDGPAASFGBINLAAWEKRERDASAIQSELQGVGDVEGSSIFAFQLAALPGSTGGL  
PVQMVLRSQDYPVLYRTMEEIKQKARQSGLFVVVSDLDYNNPVVQVRIDRAKANSLGIRMQDIGESLAVLVGENYV  
NRFGMEGRSYDVIPQSLRDQRFTPQALARQFVRTQDGNLVLSTVVRVALQVEPNKLIQFDQQAATLQAIAPAGVSM  
GQAVAFLLDDVARGLPAGFSDHWQSDSRQYTQEGNTLVFAFLAALVVIYLVLAQYESLADPLIILITVPLSICGALLPLALG  
YATMNIYTQIGLVTLIGLISKHGILMVEFANELQLHERLDRRAAILRAAQIRLRPVLMTTAAAMVFGLVPLLFASGAGAASRFG  
LGVVIVSGMLVGTFLTFLVLPVYVYLLARNHAEVDKSPRSRQLAEADLLVNKA

>AdeJ\_A\_baumannii

MAQFFIHRPIFAWVIALVIMLAGILTITKMPIAQYPTIAPPTVTIAATYPGASAETVENTVTQIEQQMNGLDGLRYISSNSA  
GNGQASIQNLNFEQGVDPDIAQVQVQNKLSATALLPEDVQRQGVTVTKSGASFLQVIAFYSPDNNLSDSDIKDYVNSSI  
KEPLSRVAGVGEVQVFGGSYAMRIWLDPAKLSYQLTPSDIATLQAQNSQVAVGQLGGAPAVQGGVNLATVNAQSL  
LQTPEQFKNIFLKNTASGAEVRKDVARVELGSDNYQFDSKFNGKPAAGLAIKIATGANALDTAEAVEQRLSELKKNYPTG  
LADKLAYDTTPFIRLSIESVHTLIEAVILVFIVMFLFLQNWRAITPTLAVPVVVLGTFAVINIFGFSINTLTMFAMVLAIGLLV  
DDAIVVVENVVERVMSEDHTDPVTATSRSMQQISGALVGITSVLTAVFVPMAFFGGTTGVYIRQFSITLVAMVLSLIVALT  
TPALCATILKQHDPNKEPSNNIFARFFRSFNNGFDRMSHSYQNGVSRMLKGKIFSGVLYAVVVALLVFLQKLPSSFLPEED  
QGVVMTLVQLPPNATLDRGTGKVIDTMTNFFMNEKDTVESIFTVSGFSFTGVGQNAIGFVKLKDWSKRTPPETQIGSLIQ  
RGMALNMIIKDASYVMPLQLPAMPELGVTAGFNLQLKDSSGQGHEKLIARNTILGLASQDKRLVGVRPNGQEDTPQY  
QINVDQAQAGAMGVSAIEINNTMRIAWGGSYINDFVDRGRVKKVYVQGDAGSRMMPEDLNKWKYVRNNGEMVFPF  
AFATGEWYGSPLRLERYNGVSSVNIQGTAPAGVSSGDAMKAMEIKGLPSMGLQGFDYEWTLGLSEERESGAQAPFLY  
ALSLLIVFLCLAALYESWSIPFSVLLVPLGVIGAVLTYLGMIIKGDPNLSNNIYFQVAIIAVIGLSAKNAILLIVEFAKELQEKGE  
DLDDATLHAAKMRLRPIIMTTLAFGFGVLPLALSTGAGAGSQHSVGFGLVGGVLSATFLGIFPVPFYVWIRSIFKYKPKTINT  
QEHKS

>AdeB\_A\_baumannii

MMSQFFIRRPVFAWVIAIFIIFGLLSIPKLPIARFPSVAPPQVNISATYPGATAKTINDSVVTLIERELSGVKNLLYYSATTDTS  
GTAEITATFKPGTDVEMAQVDVQNKIKAVEARLPQVVRQQGLQVEASSGFLMLVGINSNNQYSEVDLSDYLVRNVVE  
ELKRVEGVGKVQSFGAEKAMRIWVDPNKLVSYGLSISDVNNNAIRENNVEIAPGRLGDLPAEKGQLITIPLSAQQQLSSLEQ  
FKNISLKSKTNGSVIKLSDVANVEIGSQAYNFAILENGKPATAAAIQLSPGANAVKTAEGVRKIEELKLNLPPEGMEFSIPYD  
TAPFVKISIEKVIHTLLEAMVLVFIVMYLFLHNVRYTLIPAIVAPIALLGTFTVMMLLAGFSINVLTMFGMVLAIGIIVDDAIVVVE  
NVERIMATEGLNPKDATSKAMKEITSPIIGITLVLAAVFLPMAFASGSGVVIYKQFTLTMSVSILFSALLALITPALCATILKPI  
DGHHQKKGFFAWFDRSFDKVTKKYELMLLKIIKHTVPMVMVIFLVITGITFAGMKYWPTAFMPEEDQGWFMSTFQLPSDA  
TAERTRNVVNQFENNLKDNPDVKSNTTILGWGFGAGQNVAVAFITLTKDFKERTSSASKMTSAVNTSMANSTEGETMA  
VLPPAIDELGTGSGFLRLQDRANLGMPELLAAQDELMAMAAKNKKFYMVWNEGLPQGDNISLKIDREKLSALGVKFS  
VSDIISTSMGSMYINDFPNQGRMQQVIVQVEAKSRMQLKDILNLKVMGSSGQLVSLSEVTPQWNKAPQQYNRYNGR  
PSLSIAGIPNFDTSSEAMREMEQLIAKLPKGIGYEWGTGSLQEKQSESQMAFLGLSMLVFLVLAALYESWAIPLSVMLV  
VPLGIFGAIIAIMSRGLMNDVFFKIGLITIGLSAKNAILLIVEFAKMLKEEGMSLIEATVAAAKLRLRPILMTSLAFTCGVIPLVIAS  
GASSETQHALGTGVFGGMISATILAIFFVPVFFIFILGAVEKLFSSKKKISS

>AdeG\_A\_baumannii

MNISKFFIDRPIFAGVLSVLILLAGLLSVFQLPISEYPEVPPSVVVRAQYPGANPKVIAETVASPLEESINGVEDMLYMQSQ  
ANSDGNLTITVNFKLGDIPDKAQQVLVQNRVSQAMPRLPEDVQRLGVTTLKSSPTLTMVVHLTSPDNRYDMTYLRNYAV  
LNVKDRLARLQGVGEVGLFGSGDYAMRVWLDLPQKVAQRNLTAIEIVNAIREQNIQVAAGTIGASPSNSPLQLSVNAQG  
RLTTEQEFADIILKTAPDGAVTRLGDVARVELAASQYGLRSLLDNKKQAVAIPIFQAPGANALQVSDQVRSTMKELSKDFPS  
SIKYDIVYDPTQFVRASIKAVVHTLLEAIALVVVVILFLQTVRASIIPLLAVPVSIIGTFALMLAFGYSINALSLFGMVLAIGIVV  
DDAIVVVENVERNIEAGLNPREATYRAMREVSGPIIAIALTLVAVFVPLAFMTGLTGQFYKQFAMTIAISTVISAFNSLTLSPA  
LAALLLKGHDAKPDALTRIMNRVFGRRFALFNRFVSRASDRYSQGVSRVISHKASAMGVYAALLGLTVGISYIVPGGFVPA  
QDKQYLISFAQLPNGASLDRTAVIRKMSDTALKQPGVESAVAFPGLSINGFTNSSSAGIVFVTLKPFDERKAKDLSANAIA  
GALNQKYSIAQDAYIAVFPFPPVMGLGTMGGFKLQLEDRGALGYSALNDAAQNFMAAQAPELGP MFSSYQINVPQL  
NVDLDRVKAKQQGVAVTDVFNTMQIYLG SQYVNDFNRFGRVYQVRAQADAPFRANPEDILQLKTRNSAGQMVP LSSSL  
VNVVTQTYGPEMVVRYNGYTSADINGGPAPGYSSSQAEAAVERIAAQTLPRGIKFEWTDLT YQKILAGNAGLVWFPISVLL  
VFLVLAAQYESLTLPLAVILVPMGILAALTGVWLTAGDNNIFTQIGLMVLVGLACKNAILIVEFARELEMQGATAFKA AVE  
ASRLRLRPILMTSIAFIMGVVPLVTSTGAGSEMRHAMGVAVFFGMIGVTFFGLFLTPAFYVLIRTLNSKHKLHSAAVHEAPL  
ASPHDH

>AcrB\_H\_influenzae

MYEEIRMKFTDIFIRRPVLAVSISLLMIILGLQAISK LAVREYPKMTTTVITVSTAYPGADANLIQAFVTSKLEESIAQADNIDY  
MSSTSAPSSSTITIKMKLNTDPAGALADVLA KVNNAVKSALPNGIEDPSVSSSSGGSGIMYISFRSKKLDSSQVTDYINRVVK  
PQFFTIEGVAEVQVFGAAEYALRIWLDPQKMAAQNLSVPTVMSALSANNVQTAAGNDNGYVVSYRNKVETTTKSVEQL  
SNLISSNGDDLVRLRDIATVELNKENDNSRATANGAESVVLAINPTSTANPLTVAEKIRPLYESIQTQLPDSMESDILYDRTI  
AINSSIHEVIKTIGEATLIVLVILMFIGSFRAILIPILAIPISLIGVLMMLQSFNFSINLMTLLALILAIGLVVDDAIVVLENIDRHIKA  
GETPFRAAIIGTREIAVPVISMTIALI AVYSPMALMGGITGTLFKEFALTLAGAVFISGVVALTLSPPMSSKLLKSNAKPTWME  
ERVEHTLGKVN RVY EYMLDLVMLNRKSMLAFAVVIFSTLPFLFNSLSELTPNEDKGAFIAIGNAPSSVNVDIQNAMQPY  
MKNVMETPEVSFGMSIAGAPTSNSSLNIITLKDWKERSRKQSAIMNEINEKAKSIPEVSVSAFNIPEIDTGEQGPVSVLKT  
AQDYKSLANTA EKFLSAMKASGKFIYTNLDLT YDTAQMTISVDKEAGTYGITMQQISNTLGSFLSGATVTRVDVDGRAY  
KVISQVKRDDR LSPESFQNYLTASNGQSVPLSSVISMKLETQPTSLPRFSQLNSAEISAVPMPGISSGDAIAWLQQQATD  
NLPQGYTFDFKSEARQLVQEGNALAVTFALAVIIIFLVLAIQFESIRDPMVIMISVPLAVSGALVSLNLSFFSIA GTTTLNIYSQ  
VGLITLVGLITKHGILMCEVAKEEQLNHGKTRIEAITHAAKVRLRPILMTTAAMVAGLIPLLYATGAGAVSRFSIGIVIVAGLSI  
GTIFTLVLPVVYSYVATEHKPLPVFDENKTH

>AcrB\_Salmonella\_Typhi

MPNFFIDRPIFAWVIAIIIMLAGGLAILKL PVAQYPTIAPPAVTISATYPGADAKTVQDVTQVIEQNMNGIDNLMYMSSNS  
DSTGTVQITLTFESGTDADIAQVQVQNKQLQ LAMPLLPQEVQQQGVSVESKSSSFLMVVG VINTDGMTQEDISDYVAA  
NMKDPISRTSGVGDVQLFGSQYAMRIWMNP TELTKYQLTPVDVINAIKAQNAQVAAGQLGGTPPVKGQQLNASIIAQT  
RLTSTDEFGKILLKVNQDGSQVRLRDVAKIELGGENYDVIAKFNGQPASGLGIK LATGANALDTATAIRAE LKKMEPFFPPG  
MKIVYPYDTPFVKISIEHVKT LVEAII LVFLVMYLF LQNFRATLIPTIAVPVLLGTFAVLAAFGFSINTLTMFGMVLAIGLLV  
DDAIVVVENVERVMTEEGLPPKEATR KSMGQIQGALVGIAMVLSAVFIPMAFFGGSTGAIYRQFSITIVSAMALSVLVALIL  
TPALCATMLKPVAKGDHGEKKGFFGWFNRLFDKSTHHYTD SVGNILRSTGRYLLYLIIVVGMAYLFVRLPSSFLPDEDQ  
GVFLTMVQLPAGATQERTQKV LDEVTDYYLNKEKANVESVFAVNGFGFAGRGQNTGIAFVSLKDWADRPGEKNKVEAI  
TQRATAAFSQIKDAMVFAFNLPAIVELGTATGDF FELIDQAGLGHEKLTQARNQLFGEVAKYPDLLVGVRPNGLEDTPQF  
KIDIDQEKAQALGV SISDINTTLGA AWGGSYVNDFIDRGRVKVYVMSEAKYRMLPDDINDWYVRGSDGQMVPFSAFSS  
SRWEYGSPLRLERYNGLPSMEILGQAAPGKSTGEAMAMMEELASKLP SGIGYDWTGMSYQERLSGNQAPALY AISLIVFL  
CLAALYESWSIPFSVMLVPLGVIGALLAATFRGLTNDVYFQVGLLTTIGLSAKNAILIVEFAKDLMDKEGKGLVEAMLEAV  
RMRLRPILMTSLAFMLGVMPLVISSGAGSGAQNAVGTGVLGGMVTATVLAIFFVPVFFVVVRRRFSRKSIEDIEHSHSTEHR

>AcrF\_Salmonella\_Typhi

MANFFIRRPFAWVLAAILMMAGALAIMQLPVAQYPTIAPPAVSISATYPGADAQTVQDVTVTQVIEQNMNGIDNLMYMS  
STSDSAGSVTITLTFQSGTDPDIAQVQVQNKLQLATPLLPQEVQQQGISVEKSSSSFLMVAGFVSDNPNTTQDDISDYVA  
SNIKDSISRLNGVGDVQLFGAQYAMRIWLDANLLNKYQLTPVDVINQLKVQNDQIAAGQLGGTPALPGQQLNASIIAQT  
RLKDPEEFGKVTLRVNTDGSVVHLKDVARELGGENYNVVARINGKPASGLGIKATGANALDTATAIKVKLAELQPPFPQ  
GMKVVPYDTPPFVKISIEHVVKTLFEAAILVFLVMYFLQNIRATLIPTIAVPVLLGTFAVLAAGFYSINTLTMFGMVLAIGLL  
VDDAIVVVENVERVMMEDNLSPREATEKSMSQIQGALVGIAMVLSAVFIPMAFFGGSTGAIYRQFSITIVSAMALSVLVAL  
ILTPALCATLLKPVS AEHHEKKSGFFGWFNTRFDHSVNHYTNSVSGIVRNTGRYLIYLLIVVGMAVFLRLPTSFLPEEDQG  
VFLTMIQLPSGATQERTQKVLDDQVTHYYLNNEKANVESVFTVNGFSFSGQGQNSGMAFVSLKPWEERNGEENSVEAVI  
ARATRAFSQIRDGLVFPNMPAIVELGTATGDFELIDQGGLGHDALTAKRNQLLGMVAKHPDLLVRVRPNGLEDTPQFK  
LDVDQEKAQALGVSLSDINETISAALGGYYVNDFIDRGRVKVYVQADAQFRMLPGDINNLYVRSANGEMVPFSTFSSA  
RWIYGSPRLERYNGMPMSMELLGEAAPGRSTGEAMSLMENLASQLPNGIGYDWTGMSYQERLSGNQAPALY AISLIVVFL  
CLAALYESWSIPFSVMLVPLGVVGALLAASLRGLNNDVYFQVGLLTTIGLSAKNAILIVEFAKDLMEKEGRGLIEATLEASR  
MRLRPILMTSLAFILGVMPLVISRGAGSGAQNAVGTGVMGGMLTATLLAIFFPVFFVVKRRFNRHHD

>AcrD\_Salmonella\_Typhi

MANFFIDRPIFAWVLAAILLCLTGALAIFSLPVEQYPDAPPNVRITANYPGASAQTLNVTQVIEQNMGTGLDNLMYMSS  
QSSGTGQATITLSFIAGTDPDEAVQVQVQNQLQSAMRKLPQAVQDQGVTVRKTGDTNILTIAFVSTDGSMKDQDIADYV  
ASNIQDPLSRVNGVGDDIDAYGSQYSMRIWLDPAKLNSFQMTTKDVTDAIESQNAQIAGVQLGGTPSVDKQALNATINA  
QSLQTPQQFRDITLRVNQDGSEVKLGDVATVELGAEKYDYLSRFNGNPASGLGVKLASGANEMATAKVLDRNLNLAQ  
YFPHGLEKYIAYETTSFVKASIIDVVKTLLEAIALVFLVMYFLQNFRATLIPTIAVPVLMGTFSVLYAFGYSINTLTMFAMVL  
AIGLLVDDAIVVVENVERIMSEGLTPREATRKSMGQIQGALVGIAMVLSAVFVPMMAFFGGTTGAIYRQFSITIVSAMVLSV  
LVAMILTPALCATLLKPLHKGEQHGGQGGFFGWFNRTFNRNAERYEKGVAKILHRSLRWILIYVLLGGMVFLRLPTSFLP  
QEDRGMFTTSIQLPSGSTQQQTLKVVEKENYYFTEKNNIMSVFSTVSGSGPGNGQNVARMFVRLKDWDARDPTTG  
SSFAIERATKAFNQIKEARVFASPPAISGLGSSAGFDMELQDHAGAGHDALMAARDQIELAGKNSSLTRVRHNGLDD  
SPQLQIDIDQRKAQALGVSIIDINDTLQTAWGSSYVNDFMDRGRVKVYVQAAAKYRMLPDDINLWYVRNKDGGMV  
PFSAFATSRWETGSPRLERYNGYSAVEIVGEAAPGVSTGTAMDVMESLVHQLPGGFLEWTAMSYQERLSGAQAPALY  
AISLLVFLCLAALYESWSVPFSVMLVPLGVIGALLATWMRGLENVYFQVGLLTVIGLSAKNAILIVEFANEMNQKHA  
LLDATLYASRQRLRPILMTSLAFIFGVLPMATSTGAGSGSQHAVGTGVMGGMISATILAIFFPVPLFFVLIRRRFPLKPRPE

>AcrB\_K\_pneumoniae

MPNFFIDRPIFAWVIAIIIMLAGGLSILKLPVAQYPTIAPPAISITAMYPGADAETVQNTVTQVIEQNMNGIDHLMYMSSNG  
DSTGTATITLTFESGTDPDIAQVQVQNKLALATPLLPQEVQQQGISVEKASSSFLMVVG VINTNGTMNQDDISDYVAAN  
MKDPISRTSGVGDVQLFGSQYAMRIWMDPNKLNNFQLTPVDVISALKAQNAQVAAGQLGGTPPVKGQQLNASIIAQT  
RLTNTEEFGNILLKVNQDGSQVRLRDVAKIELGGESYDVVAKFNGQPASGLGIKATGANALDTANAIRAELAKMEPFFPS  
GMKIVYPYDTPPFVKISIEHVVKTLVEAAILVFLVMYFLQNFRATLIPTIAVPVLLGTFAVLAAGFYSINTLTMFGMVLAIGLL  
VDDAIVVVENVERVMAEEGLPPKEATRKSMGQIQGALVGIAMVLSAVFIPMAFFGGSTGAIYRQFSITIVSAMALSVLVALI  
LTPALCATMLKPIQKGSHGATTGFFGWFNRMFDKSTHHYTD SVGNLRSTGRYLVLYLIIVVGMAVFLVRLPSSFLPDEDQ  
GVFLSMAQLPAGATQERTQKVLDEMTNYYLTKEKDNVESVFAVNGFGFAGRGQNTGIAFVSLKDWSQRPGEENKVEAI  
TARAMGYFSQIKDAMVFAFNLP AIVELGTATGDFELIDQGGLGHEKLTQARNQLFGMVAQHPDVLTVRPNGLDTP  
QFKIDIDQEKAQALGVSISDINTTLGAAWGGSYVNDFIDRGRVKVYIMSEAKYRMLPEDIGKWYVRGSDGQMPFSAFS  
TSRWEYGSPRLERYNGLPSLEILGQAAPGKSTGEAMALMEELAGKLPSGIGYDWTGMSYQERLSGNQAPALY AISLIVVFL  
CLAALYESWSIPFSVMLVPLGVVGALLAATFRGLTNDVYFQVGLLTTIGLSAKNAILIVEFAKDLMEKEGKGLIEATLEAVR  
MRLRPILMTSLAFILGVMPLVISSGAGSGAQNAVGTGVMGGMVTATILAIFFPVFFVVKRRRFSKKSSEDIEHSHQVEHH

>AcrD\_K\_pneumoniae

MANFFIDRPIFAWVLAILLCLTGAILSLPVEQYPDLAPPNVKITANYPGASQTLNVTQVIEQNMGTGLDNLMYMSS  
QSSATGQATITLSFTAGTDPDEAVQQVQVQNLQSSAMRKLPQAVQVQVTVRKTGDTNLTAFVSTDGSMQDIADY  
VASNIQDPLSRVNGVGDIDAYGSQYSMRIWLDPAKLNSYQMTTKDVTDAISSQNAQIAVGQLGGTPSVQKQALNATIN  
SQSLLQTPEQFRNITLRVNQDGSSEVTLGDVATVEMGAEKYDYLRYNRQPASGLGIKLAGANEMATAERVINRLNELA  
QFFPHGLEKQVAYETTSFVKASITDVVKTLLEAILLVFLVMYLFLQNFRATLIPTIAVPVVLMTGFAVLVYACGYSINTLTMFAM  
VLAIGLLVDDAIVVVENVERIMSEEGLSPREATRKSQMGQIQGALVGIAMVLSAVFVPMFAFFGGTTGAIYRQFSITIVAAMVL  
SVLVAMILTPALCATLLKPKPGESHRTGFFGWFNRTFNRSASRYETFVGKILHRSRWMILYVLLLGGMVFLFLHLPSTFL  
PLEDRGMFTTSVQLPSGSTQQQTLKVVQKAEDYFLNNEKQNVESVFATVSGSGGNGQNVARMFVRLKDWDQDRDPQ  
TGTSFAIERATKAFNQINEARVIASSPPAISGLGSSAGFDMELDHAGKGDALMAARDTLELAGKNPLLTRVRHGLD  
DSPQLQVDIDQRKAQALGVSIIDINDTLQTAWGSSYVNDFMDRGRVKKVYVQAAAKYRMLPDDINLWYVRNSSGTM  
VPFSAFATSRWETGSPRLERYNGYSAVEIVGEAAPGISTGTAMDMMEKLAALPTGFGLEWTAMSYQERLSGAQAPALY  
AISLLVFLCLAALYESWSVPFVSVMLVPLGVIGALLATWMRGLENVYFQVGLLTVIGLSAKNAILLIVEFANELNEKGQDL  
LSATLSACRQRLRPILMTSLAFIFGVLPMTSTGAGSGSQHAVGTGVMGGMISATVLAIFFVPLFFVLVRRRFLKERPQ

>AcrF\_K\_pneumoniae

MSKFFIHRPVFAWVLAIIIMMIAGGLAILQLPIAQYPTIAPPAVAISATYPGADAQTVQDVTQVIEQNMNGIDNLMYMSS  
TSDSAGSVTITLTFKSGTDPDIAQVQVQVQNLQLATPLLPQEVQQQGISVEKSSSSFLVAGFISDNPTTTQDDISDYVASNV  
KDPI SRLNGVDVQLFGAQYAMRVWLDGNLLNKYNLTPVDVINALQVQNDQIAAGQLGGTPALKGQQLNASIIAQTR  
LKDPQEFQKVTLRVNADGSVVHLKDVARIELGGENYNVVARINGKPASGLGIKATGANALDTATAIKAKLAELQPYFPQ  
GMKVVPYDTPFVKISIEHVVKTLFEAILLVFLVMYLFLQNMRTLIPTIAVPVLLGTFAVLMSFGYSINTLTMFGMVLAIG  
LLVDDAIVVVENVERVMVEEKLSPKEATEKSMSQIQGALVGIAMVLSAVFVPMFAFFGGSTGAIYRQFSITIVSAMALSVLV  
ALVLTALCATLLKPASAEHHEKKGFFGWFNARFDQSVNHYTNSVSGILRGTGRYLVIYLLIVVGMMAVLFMRHTSFLPDE  
DQGVFLTMIQLPSGATQERTQKVLDTVTDYLLHNEKANVESVFTVNGFSFSGQGQNSGMAFVSLKPWEARSGDENSVE  
SIIKRATVAFSQIKDAMVFPFNMPAIELGTATGDFELIDQGGLGHTALTQARNQLLGMVKQHPDQLVRVRPNGLDTP  
QFKLDVDQEKALGVSLSDINETISAALGGYVNDFIDRGRVKKVYVQADAHFRMLPSDINNMYVRSANGEMVPFSAF  
VTSRWIYGSPRLERYNGLPSMEILGEASPGKSTGEAMALMETLASKLP SGIGYDWTGMSYQERLSGNQAPALY AISLIVF  
LCLAALYESWSIPFSVMLVPLGVIGALLAATLRGLNNDVYFQVGLLTTIGLSAKNAILLIVEFAKDLMEKEGKGIIEATLEASR  
MRLRPILMTSLAFILGVMPLVISHGAGSGAQNAVGTGVMGGMMLTATLLAIFVFPVFFVVRRRFTRHAE

>AcrB\_E\_ictaluri

MAKFFIDRPIFAWVLAIIIMMLAGALAIMSLPVAQYPTVAPPAVTISASYPGADAATVQNSVTQVIEQNMNGIDNLMYMS  
STSDSAGNASITLTFEAGTDPDIAQVQVQVQNLQLAMPSPLPQEVQQQGVSVQDKASSSILLVAGFISEDGSLSQDDIADYVA  
SNIKDPLSRTQGVGSVQLFGSQYAMRIWLDPNKLNKYNLTPVDVVSQIKVQNNQIAGGQLGGTPPVPGQQLNASIIVQ  
TRLKDPTEFGKILLKVQQDGSRVLLRDVARVELGAENYGTIARYNGKPAAGIAVKLATGANALDTAKAVKTELARLAPYFP  
ASLKTVPYDTPFVQLSIDEVVKTLLEAIVLVFVVMYFLQNIRATLIPTIAVPVLLGTFAVLEIVGFSINTLTMFGMVLAIGL  
LVDDAIVVVENVERVMSEEGLPPEATKKSMEQIQGALVGIAMVLSAVFVPMFAFFGGSTGAIYRQFSITIVSSMVLSVLVA  
MILTPALCATMLKPIAKGDHGVQTGFFGWFNRLFEEKSTHHTDSIGRILRGTGRYLVIYLLIVVGMGLLFI RLPTSFLPEEDQ  
GVLLTMAQLPPGATQERTNNVLKQVSHYYLTKEKDNVESVFTVSGFGFSGQGQNNGLAFVSLKPWDERKGDQNKVTAI  
IQRAAVAFSKINDAMVYFPNLPAIVELGTASGDFELIDQANLGHEKLTEARNQLLGMAAQHPDLLVGVVRPNGLDTPQF  
KLDIDQEKALQSLGVSLADVNQTISAALGGAYVNDFIDRGRVKKVYVQADAPFRMLPSDIDNWWYVRSSNGQMVPLSAFS  
SSRWEYGSPRLERYNGLPSMEILGEAAPGKSTGEAMALMETLVAKLPAGVGYDWTGMSYQERLSGNQAPALY AISLIVF  
LCLAALYESWSIPFSVMLVPLGVVGALLATSLRGLTNDVYFQVGLLTTIGLSAKNAILLIVEFAVDLMHKEGKGLVEATLEAV  
RMRLRPILMTSLAFILGVMPLVISNGAGSGAQNAVGTGVMGGMVSATILAIFVFPVFFVVRRRFGRSEDLEHSRPVEPH  
NK

>AcrF\_A\_hydrophila

MARFFIDRPIFAWVIALVIMLAGSLAIKLPVAQYPSIAPPAVGISASYPGASAKTVEDSVTQII EQNMTGLDHLLYMSSQSD  
SSGRVSVTLTFQPGTDPDIAQVQVQNKLQQAMSLLPQEVQQGIRVQKTSSSFLMVAAFIKSGDAMTNDLDLADYVVA  
NIKEPLSRLDGVDITLFGSQYSMRVWLDPNKLNVRVQMTPGDVQAAIKAQNTQVAFGKLGSTPAVSDQRFTATIMGQT  
RLSTVEEFNDILLRVNQDGSKVRLKDVARELAGESYDAEALYNGQSTAATAVAIKLATGANALDTAEKVRGKLNELSTYFPA  
NMEIVYPYDTPFVKISIEEVVQTLVEAIFLVFCVMYFLQNFRA TLIPTIAVPVLLGTFGVMSAFGFSINTLTMFGLVLAIGL  
LVDDAIVVVENVERLMSEEDLSPLEATRKSMQTITGALVGIALVLSAVFVPMAFFGGSTGAIYRQFSLTIVSAMVLSVLVALI  
LTPALCATLLKPIKHGEFGAKRGFFGWFNRAFDASANRYQSGVRKVVKQGVRYGIIYAAMLAVLAILFMRMPTSFLPEED  
QGVIMSMVQLPVGATKQRTFVLADMRDYFMKNEKDNVDSVLTAVAGFSFAGSGQNSGMAFIKLDWKERNTPDRSA  
NAIIGRAMGYLFSIKEAQVFAFNLPPIELGTATGFDFLQDRAGVGHDKLMAARNQLLGMAAQDPNLVRVRPNGMED  
TPQLDIKIDYEKALAQGLSISDINSTLSSAWGSAYVNDFVDRGRVKVYLQADAPFRMNPEDLKLWYVRNSAGQMVPFS  
AFASTDWSFGSPRLERYNGVPAMEIVGEAAPGKSTGDAMAAIEQMVKQLPEGIGIEWTGLSYQERQAGSQAPALY AISLL  
VVFLCLAALYESWSIPFSVMLVPLGLVGAIVAATLRGLEN DVYFQVGLLTTIGLSAKNAILIVEFAKELYDRGMGLSEAVVE  
AARLRRLPILMTSLAFILGVLPLVISTGAGASSRNAIGTGVMGGMISATVLAIFFVPLFFVLVMRYFTKHSTKQARLAHAEEIK  
HD

>AmrB\_A\_hydrophila

MPQFFIHRPVFAWVIALFIVLAGVIAIPKLPI SHYPSVAPVSVTLYATYSGATPQTLNDAVVSLIERELSGVKNLLYFESSVDA  
SGSAQITATFKPGTDELAQMDVQNRKAVEPRLPQAVRQNGLQVESASSGFLMMVGMTSPDGRFEEVALNDYMARN  
IVQELRRIDGVRVQLFGAEQAMRIWVDPGKLAAYGLTISEVAQAIEQQNVQIAPGRLGDEPALPGQRLTVPLTVEGQLT  
TPEAFAAIVLRAGTDGAKLVLG DVARVELGAQSYAFANRENGVAATSAAIQLSPGANAVRTADAVRTRLAQLSPTLPAG  
MAYSIPFDSAPFVKVSIKVIHTLLEAMVLVFLVMFLFLQNLRYTLIPAVIAPIALLGTFAVMLLAGFSINSLTMFGMVLAIGIIV  
DDAIVVVENVERLMASRGLSPREATSQAMKEISGAVIGITLVLTAVFIPMAFGGGSGVVIYQQFTLSMAVSILFSAFLALT  
PALCATLLRPISPDHHEKRGFFGAFNRGVERLTAGYGARVTSLVGRSGRVMATFAALCAVLAI AATQLPSSFLPDEDQGYF  
MTSIQLPTGATSSERTQAVIKEFEAHVASREALDTNLVVQGFSGAGPNAAMAFTMLKDWDQRHGATAAEEAELAQAA  
MANSHEGTVMSLMPPTIDELGTASGFTLFLQDRANRGEAALLAAQAQLLALAANSKVVSDVYPDSLPPGQSVHLEINRQ  
KAEAMGLSFTSVSSTLSAAMGSLYVNDFPNDGHMQQVILQADASARMQLDDVLGLRVNASGGMVPLREV VTPVWR  
ESPQQMMRFDGFP AVRIAGGAAPGISSGAAMAEMERLVAQLPPGFAVAWTGQSLQERQSAAQAPLLMLLSGLVFLV  
LAALYESWSIPLSVMLVPLGLLGAVAAVMLRGMPNDVFFKVGMITIIGLSAKNAILIVEFARQLHGEGRSLDDAAVTAARL  
RLRPILMTSLAFTLGVVPLMLASGASAETQHAIGTG VFGGMISGTLAIAFFVPVFFVFIIGAQERLQRWQARRAEQRGSQ

>MexFQ\_A\_hydrophila

MFSKFFIERPIFASVISIIIVLGGLAAMRSLPIEQYPQITPPVSVTAFYPGATPEVISQTVAAPLEQQINGVERMLYMQSGSA  
SNGQMNLNVYFEIGTDPDQATINVN NRVSAAAMAQLPEEVKKQGVTVKKKSTSILQVVTLQSPDGTFTTYLSNYALLNII  
DELKRIPGVGDTTLFGGTDYAMRIWLRPDRLAQLELTPSDVIGAIREQNTQFAAGKIGAQPPTAPIDFTYTVQTKGRLEDV  
REFQNIIRSMPDGSKIRVKDVARVELGGKDYDLLAKANGKPAIGIATYLQPGANAVAVADQVHATMLRLKERFPQDIEYQ  
IPYDTTEFVKISIEEVVHTLFEAIVLVFVVVYFLQNFRA TLIPCIAPVPSLIGTFAGMLVLGFSINLLTLFGMVLAIGIIVDDAIV  
VLENVERIMQEKKCSPKEAAILAMQEVSGPVVAIVLVLCVAVFLPVAFMGGMTGVMYKQFAITVAVSV AISGLVALTLSPAL  
CAVLLKEGHHPARFFVWFNNAFDGLTRRYVRGVAFNRRVGVAFTIIAFILVSIYGLLMKVPGELVPNEDQGYLLSAVML  
PDAASLRTQTAVANDFDQMAMANPNVKDVITFSGFDILSNAIISNSGISFITLKDWSERQGAGQDSFSLAKTFQGMSLM  
GLADGFVASFNPPITGMSTTGGLAYLQNRSTGNAQAFSAEVQRFL EAAKQRPEFASVTSTYRANVPQVYLDLDREKA  
KALGLPINAVFDTMQATFGQVYVNDFNQFGRTYRVQLQSEADYRAKKS DIRNVYVRSDKGEMIPLSSLVTVRDATGPEL  
VERFNIFQAAKIMAPAPGYSSGQAIAALEAVADESLGNDAKLEWTGSAYQE KAAAGSAGTAFGFGIVMIFILILAAQYER  
WSLPFAVITAVPFALFGALLATWLVLGTNNVYFQIGLVTLVGLAAKNAILIVEFAVMKHEEGMSLIESALEAARLRFRPIVMT  
SLAFILGCVPLVTSSGAGAASRHALGW PVIGGMLAATFIAIFFIPLFFRLIMRRSERAGGKTAQPKS

>AcrB\_A\_hydrophila



MRFTDIFIKRPILAISISFLIALLGVQAVFKMQVREYPEMTNTVTVSTSYYGASADLIQGFITQPLEQAIAQADNIDFMTSST  
QLGSSTITAYMKLNTNPNAALSDILAKVNSVRSQLPKESEDPSVTMSTGSTTAVLYIGFTSPELNASQITDYLERVIKQPLFT  
VGGVSKVDMYGGTKYALRVWLDPAKMAAFNLTAADVMSVLNSNNYQSATGQATGYFTLYNGNAETQVNTTEELERL  
VVATRDGKVIRLADIKVSLEKSHDTYRATANGREAVVLAINAAPTANPINIAHDVLEMLPSLKSNNMPSTMEANVLYDSTV  
AINESISEVIKTIAEAAAIVLVITLFLGSFRAVIPIITIPLSLIGVVMVMQMFGFSINLMTLLAMVLAIGLVVDDAIVVLENVDR  
HVKEGEEPFRAAIIGTREIAVPVIAMTVTLAAVYAPIALMGGITGSLFKEFALTLAGAVFVSGIIALTSPMMCAKMLKANEEP  
GKFESKVHLLDRMTVRYDAMLHAVMQKRIVVVLFAVIVFASLPMLFKFIPSELAPNEDKGVMAVLGTAPSNVNLDYIQG  
TMEQVNKVLDEQPEVAFSQVFSGVFNANQAFGIASMPWSQREASQKEVLERVGKLVENVPGMSITTFQFPELPGASS  
GLPIQFVITTPNNFESLYQVASEILTAAQGSGRFVYSELDLQYDSATMKIKIDKDKAGAYGITMQDIGITLGTMMSDGYVN  
RIDLDGRSYEVPQVERKYRLNPESIKGYVRAADGQSIPLGSLISIEVVGEPRALPHFNQLNSATIGAVLMPGTTMGNAIA  
WLDATASEKLPGYRYDYMGEARQFVTEGSALYATFALALAIIFLVLAIQFESARDPLVIMVSVPLAISGALIALAWGAATM  
NIYSQVGLITLVGLITKHGILICEVAKEEQLLHGRNRMEAVMAAAKVRLRPILMTTAAMIAGLIPLLYATGAGAAQRFSIGIVI  
VAGLAIGTLFTLVLPVIYTYLASEHKPLPVFDESIPPKAKGSH

>AcrB2\_C\_burnetii

MKLSEICIRQPVLAIVLSLILVVLGVVAFQRLELRFPPKLELPILTVATTYDGASAQLMESQVTTQIENALSGVDHIASISSTSYP  
GSSYVTVLFLQGGNFEEASAVRDKVFAIRDQLPPNANPPTITVGTGKNPVLGIGFIDPQKSSADIRDYVERAVQPALRQL  
SGVGEVDILGASDYAMRIWLNASKMVAHQVTVDVKNALTANNIYFPAGSIQEPKRNYSIVSHTQLKDATAFGNIIKNN  
DGGTVRLNDIGHAELGYRSLYEAPMRINGQNGIELLIEPLQEANPVTVAHEVKQALATIQKNLPPGMQASVNYDASTFLK  
SSIEETFYAMGEAVLLVIFVVLFLGSARAASIPIITIPVSLIAVFAFIKLFGFTINTMSLLGIVLAIGLVVDDAIVMLENIHRHIEEG  
MTPFQAAIKGSREISFAIIMALTAVVYAPVGVQGFTELFKEFAFTLAAAVVISAFIALTLSPMMCSRILLPRTKDSRLTII  
DRAFSQLTGIFYQRFLKFAFNKRRLFIAGLLAIGVGYVLFISLPSELIPKEDIGLIQVSVTSPSGASLNYTNQYAEQVEKIIQQN  
PAVASVMSQVSTTSVNIRVTLKPWGERRETTAQVIANLNPKLAAIPGIDATAYLPDVVNYGLQGNDIDLNFMTAGDYTD  
LLDPINKMMKLLKHYPGVTDLHTNLKYDTQQYAITIKRDLAAVLGVNIQDIADTVSAMMSGNHWTVDVQAGNKSIEVIV  
QMDKQDLTDFNALKKLYVHSNNKTDANKGNSIPVSSLIDLTPTVGQGSFTHFNRRSGTISARLAPGYSESQVIDYIKAHV  
PFVMTSDVHYAFSGKAAQFLQSSKSMIGIILMSLFIYLVLSAQFGSFLDPFVILLAVPLCIVGGLLSKLTTGGTLSIYSQIGLVT  
LIGMISKHGILITQFINDLRKQGMAMQEAILRGAMIRLPVLMTTLAMVFGALPLALASGPGSIGRHQIGWVIVGGLLFGTF  
FSLIVVPIAYSYLGRFKKR

>AcrB\_C\_burnetii

MNISEICIKRPVLAIVLSLVLVVGIMGFNDLNTRFFPKFEQNVINISTAYPSASAKLVESITTPLEEGISGVQGIDTIISQSFO  
GESDIKLTLDYGVNVYEVANQIRDKVEQARVQLPTNINAPVVQVGWGNMELMDVGFTAPNENPKAIRDYLERNVIDQIE  
QIPGIADVEVAGANQYAMRIWLDLPQKMAARGLSVNDVQMAIQNSNVELPAGEIKGSSINYPITAETKLNTADQFNNIIV  
KNDNGQVIRIKDIGQAQLDDDSADQSIVTLDGQPGVLLSINNATDANPLDAAKNVNHFLNQIRPHLPNGMKIVPSFDIS  
AYMHGSIHEVYISIGAILCVILVIFLFLGRLRTVAIPIATIPVCLIASFGAMYLLGFSINVITLLALVLSIGLVVDDAIVMLENIYRHI  
ENGEKPLIAAIKGSKEITFPVIAMTITLAAVYAPIGLMQNQAANIFRSFAFTLAGAVLISGFVALSLSPMMCSRFLKAQGGEP  
KGYSRIETIYERMAQGYQKILAAILNKRILVFAAVLIAVGGFFLAKNIPMAFVPQEDMGFVIAAVSTSSGSSINTINRGLEQ  
VASIFKQAPAVASVTVADTNAKAFDSVFAMLPFKDRKQSASQVADVINKIKQIPGLNAAAFAPSFGGSMQHQLIFY  
LMGDTYSDLYAVSQKLINQLGNYPGLRVIQSNMRFDSQQYNMTVNRDIAGQLQANIKDIDNTMAALYGGSKISTFDAN  
GKTYNVYLQAQENDLHSLASINKFYVNAQNKLIPLSNLISIKPILSQVVLPHYNHLRAAQMSAQLAPGYNLGTVVNYLQ  
TELPQLLPANVKYFTGQAHDLLTSNNSMGLIFLLAMVFIYLVLAAQFESFIDPFILLAVPLSIVGAMASLKLIGGTLNITYDI  
GLVTLIGLVSKHGILITQFANRLQKEGLAMREALKAAISIRLPILMTTAAMVFGALPLLFSSGGSASQSRHQIGIVIIGGLIFGT  
FFSLVVVPVAYSAYKFKLFLKRFKTTDEMSLSGK

>MexIW\_C\_burnetii

MASSKFTDKFIIRPVLAIVVSLFIFILGLRAITEMEVRQYPKMNNLTITISTAYPGAPASLIEGFITTRLEKSIAGAEGIDYMTSTST  
QGVSTINVFIKLNFDPNVAFTDIMSKVAQVQNDLPRESQLPVIQKLTGTQTALMYISFSSDQMSSEQISDYLNRRVQPKIE

TVFGVSQAEILGGQTFAMRVWLNTKRMAALNVPTDVTQALINNNFQSAAGQTKGDFITLYIAKTDIGDKQAFENLVIK  
EVNGTLIRIDIGRVELGAEDYDSSVYMNGKSAIFVAVNTTPTANPLSVIANVKKILPDLEKEYPPSLHSHKVYDATEYIQASI  
YEVIRTIFEATLIVIVVIFLFLGSIRTVVIPVITIPLSLIGVCFLMWFLGYSLNLLTLLSMVLAIGLVVDDAIVVVENVYRHIEGMD  
GFHAAIRGAREIAFPIISMTLTLAAVYAPIGFMGTGLTGALFTEFAFTLAGAVIVSGIIALTLSPMMMCCKFLNQNIGKQRYVQFI  
DRSFERLKQFYSRRLHGVNLHRFLMVLLAVAVLASCFIFYMNTTSELAPEEDQGALFVQAQAPQYANIDYVEAYSKQYEK  
YFKKLPSMANYFMINGFGTVNTVLAAMIMKPWDQRQQSQKQAQAILQPELNTVAGLQTVVFPPLASLPGGGTGLPVQF  
VITSIAPFNKIYLATEQIVEEAKRSLFIFVDSSELKYNNPQLNVIIDRNKAGDLGVTMQSLSQLAYSLGGNYINRFAMMGQS  
YKVIPQLSRLFRLNPSNLEQIYVNTAGGQLIPLSTLVKMNITTQPNLLSHFQQLNQAQIDAVLAPGHTMGEALTYLEQTAN  
KVLARDMSYDFGGQMRQFVQEGQALVVTFLAIIIIYLVLAQFESFRDPFVILISVPMSICGALIFLNLGLATINIYTQIGLVT  
LIGLISKHGILMVEFANKLQEEEGLSVREAIEKSAAIRLRPILMTTAAMVLGVVPLILATGAGAVSRFDIGLVIATGMLIGTMFT  
LFVVPTMYLLIAKKHQPLRKVDE

>MexFQ\_M\_hydrocarbonoclasticus

MLRTFIDRPIFASVISIIITLGGALALLGLPVEQYPNVVPPQVVVDGRFPGASADVISDSVVAPELQEINGVDDMIYMESSAT  
DSGSFRVTVSFEIGTDPDQATINVNNRVQQALARLPQTVRDQGLKVESRSTSILQVITLSSPDNSMDVVEISNYALLNVLD  
ELVRLPGIGDASLFGAQDYSMRIWLRPKLAQFELTPADVAGALRAQNAQFAAGRIGAEPAPEGQAFTFVSAPGRLTSP  
EEFGEVILRSDDQGASRLKDVARIELGAQNYDFAAIYNGGATVPMGVYLQPGANALDAAEAVNEAMKEIADRPEGLE  
NVPYDTRFIDISIQEVISTFIVAVLLVVVTFLLQHFNATLIPLIAIPVSLVGTFAQMAMGFSVNLLTLFGLILAIGVVVDN  
AIIIMENAERLIKEEGMSPYNAAVTTVSQVSGAVVASTLVLVAVFAPVAFLLGGLSGELYRQFAITIAVSVVISGVVALTLTPA  
MCALLGHGEGKQLTVFRWFDAGFDKVTNGFSAVVDWLLRHAVIGVLLFAAMIGGTVFLNKMPSGLVPQEDQGFVLTA  
YSLPATSSLSRTEGTRDELAQNMLQLPEVKDVVAFAGFDIISALRTNSGVAFVLTLEDWAERELEGQGAADIANKIMGIF  
GMPEAFVIAFTPPPIQGLSTTGGVEGYIQARGGRTPAEIKAMADRFTAANQRPELTNVRVLTDTGIPRYQAIVDREKAQ  
AAGVPVDQIFTTQMSTFGGLYVNDFTLQGRNWQVTLQSEGEFRSHPDRLKVFVRSSYGEMIPSSLVELERVSGPDILN  
RFNVYPAAKLLADPTPGHTTGEALTALQEVANQQFDRNTLLGWTGEAYQLQDSADSGTLAFGMGLLVFLILAAQYER  
WGLPVAVATAVPFGVFGAALASLLRGFPNDIYFQVGLLVLIGLAAKNAILIVEFAAQNRQTGMSSFEAASTAARQRFRAIM  
MTALTIVGSLPLAFSTGAGAVSRQEIGTVVVGGMVLVASTLALFFVPLFYKLIEDLADWRRKRKAA

>MexFQ2\_M\_hydrocarbonoclasticus

MISRVFIQRPKFAFVISILITLAGALALRILPVNMYPDMAPPQVQVTATLPGASAQVVEEAVIRPVEQQNLNGVEGMIYMESS  
ASSDGTAKITLTFESGTDTDIAQVNVQNRVALAEPFLPDEVRRQGVIVSKQTGNMMLGINLTSSRDDLDGVFLSNYASNN  
LVEALGRVAGVGSAEVMGAKDYSMRVWLNPRRMAALDVTVAEVAALKEQNQIVAAGKLGQSPVPAGQQFVYSIQTR  
ERLSDPEEFQGTILRSRPDGGFVRLRDVGRIELGSRSYSTAKLNNRDTAFVVIYQLPDANALDVAERVKALVESASASPEG  
VEYSVLYDTTEFISRSISEVVVTLFQAVGLVILVVFLQNWRTATLIPSIAIPVSLIGTFAVMSVLGYSINTITLFLVLAIGIVD  
DAIVVIENVERILKEEALPIREAVSKAMAEVTGPVIATTLVLLAVFVPVAFMPGITGKLYQQFSVTISVAVIISVNALTSPALC  
VALLGRGGDQSVRWLRPFETLITRSTGGYSKAVAELLRKGMVLVGLVLLVVLVAGGGLFKAVPFAFVPPEDQGFLFVDVQL  
PDAASLERTDAVLEKVTDMVLEDPAVTDFITVSGFSLGGAASNGLGIVMLKDWEDRETPELGLGSVIPRLYSKLWTVSE  
AQVMVFNPPIPLGLTSAGFDYRLQDNLGRDVSELAQVMNGLIFQANQHAPLSRVYSTYRANIPQYLLEVDRNKAKAL  
GIQLSDIFSTLQTQLGSLYVNDFTFRGKNYRVLLQAEGEYRQRPEDLTHYFVRNQEGDMVPLTTLASLEPVLGPSSIQHFN  
LKRSVTLSGEPAPGFASGDAINAMEALSESPLQGYEFSWSGQSLQEIQAGNLAIVFVLALVFVYFLVAQYESWSLPAAV  
LGAVPLALAGAMAGLWLVGLANNIYAQVGLVLLIGLSTKTAILIVEFAMQLRASGLSTAEAAQKAAVLRFRVLMTALSFV  
LGVLPVLFASGAGAASRVSLGITVLSGMVAATILGTLLVPVFYQWIQSIRDRRMASGQGA

>MexIW\_M\_hydrocarbonoclasticus

MKFTDIFVHRPVLATVVSLLILLIGARAAMEMEIRQYPELESTTVTVSTAYPGASSDLIKGFITPLQQAIAEASGIDYLTSTSS  
QSVSTIQAKMILNYDANDALAEIQAKVASQRNVLPAAEADPVITSTTGSTALMYIAFYSTELDVPQITDYLTRVVQPKLQ  
ALAGVGKAEELLGRTFALRIWLDPERLAAVDMTPVEVAAKLANNYQAAVGKTRGKYTEVSLTSDTDIADPDAFRNLVVK  
QSNGLTIRLQDIARVELGSQTYDSLALYKGQPATYVAIELAPGANPLTVAELVKAELPDIESQLPSGLNVRLAYDASDFIDD

SINEVIQTLLEAMIIVLVVVFLCLGSVRASVVPVAVPLSLIGGAFVMLMFGFSLNLLTLLSMVLAIGLVVDDAIIMVENVHR  
HIEQGESRFDAANGAREMATPIIAMTTTLVAVYAPIGFMGGLVGSFTFEAFTLAGTVVISGIVALTLSPMLSAKVLKPHGD  
PGRFEKVVEKSFNGLANGYKAALASLMQTKSVVVFVAVVLGSIYFMLMMSQNELAPTEDQGILFYQGLGPETSTLDYLY  
DHGQEVQNRMSSEVPGYSEDFMILGITSNAVFGGFKLAPWSEIREITQFEVQPKLDAELKKVTGLQTAVFPRPSLPGSGGG  
LPFQFVITGGSYEQLDQVADEMLGKAMQSGNFMFLKKSINFDPVTRINVDNRVADLGLSMQDVGQSLASMLSGGY  
INRFNMEGRSYQVIPQVDDQFRPSKEALQDYYIRAGNGELVPLSSVVSFTEEVEPSNRTQFNQQNSLTLEGVVMPGVAA  
GTAMEFMEQTASDVFPQGFSYDYGTRQLATQGSALMVTFFLSLLVIYLVLAQFESWRDPPIILVSVPMVSVAGAMAFIV  
LGFATMNIYTQVGLITLIGVVSKNLILVIFANQLQKERGLNKVDVIEAAAIRLRPIIMTSLALIFAMVPLLIAGPGAESRFAI  
GLTISAGLGIGTLFTVFLPAFYILLARDHHGSAADYGNDEESSQVPAGNH

>AcrB\_C\_koseri

MPNFFIDRPIFAWVIAIIIMLAGGLAILKLPVAQYPTIAPPAVTISATYPGADAKTVQDVTQVIEQNMNGIDNLMYMSSNS  
DSTGTQVQITLTFESGTDADIAQVQVQNKQLQAMPLLPQEVQQQGVSVKSSSSFLMVGVINTDGTMTQEDISDYVAA  
NMKDAISRTSGVGDVQLFGSQYAMRIWMDPTKLNNFQLTPVDVINAQNAQVAAGQLGGTPPVKGQQLNASIIAQ  
TRLTSTEEFGKILLKVNQDGSQVRLRDVARELGGENYDIIAKFNGQPASGLGIKATGANALDTANAIKELKKMEPFFPS  
GMKIVYPYDTPFVTISIHEVVKTLVEAIIVLVFLMYLFLQNFRAITLIPTIAPVAVVLLGTFVLSAFGFSINTLTMFGMVLAIGLL  
VDDAIVVVENVERVMSEEGLPKEATRKSMGQIQGALVGIAMVLSAVFIPMAFFGGSTGAIYRQFSITIVSAMALSVLVALI  
LTPALCATMLKPVAKGSHGSTKGGFGWFNNMFEKSTHHYTDVGNILRSTGRYLLLYLIIVVGMAFLVRLPSSFLPDEDQ  
GVFLSMAQLPAGATQERTQKVLDDEMTDYYLTKEKDNVESVFVNGFGFAGRGQNTGIAFVSLKDWADRPGDENKVDI  
TGRAMGAFSQIKDAMVFAFNLPALVELGTATGDFDQLIDQGGGLGHEKLTQARNQLFGEVAKHPDLLVGVVRPNGLEDTPQ  
FKVDIDQEKALQALGVSISDINTTLGAAWGGSYVNDFIDRGRVKKVYVMSEAKYRMLPEDIGNWYVRGSDGQMVPFSAF  
SSSRWEYGSPRLERYNGLPSMEILGQAAPGKSTGEAMAMMEELASKLPSGIGYDWTGMSYQERLSGNQAPALYAIISLIVV  
FLCLAALYESWSIPFSVMLVPLGVIGALLAATFRGLTNDVYFQVGLLTTIGLSAKNAILIVEFAKDLMDKEGKGLIEATLEAV  
RMRLRPILMTSLAFILGVMPLVISSGAGSGAQNAGVTGVMGGMVTATVLAIFFVPVFFVVRRRFSRKSIEDIEHSHSVEHH

>AcrF\_C\_koseri

MANFFINRPIFAWVLAIIIMMAGALAIMQLPVAQYPTIAPPAVAISATYPGADAQTVQDVTQVIEQNMNGIDNLMYM  
SSTSDSSGVSITLTFQSGTDPDIAQVQVQNKQLQAMPLLPQEVQQQGISVEKSSSSFLLVAGFVSDNKNLTQDDISDYV  
ASNVKDTISRTSGVGDVQLFGAQYAMRIWLDNALNKYQLTPLDVINQLKTQNNQIAAGQLGGTPSIPGQQLNASIIAQ  
TRLKTPPEEGRITLKVNDGSMVHLKDVARIELGGENYNMVTKINGQAATGLGIKATGANALDTAAAIKAKLAELQPPFP  
QGLKVVYPYDTPFVKISIEHVVKTLFEAIIVLVFLMYLFLQNIRATLIPTIAPVAVVLLGTFAILAAGFSINTLTMFGMVLAIGLL  
VDDAIVVVENVERVMVEELKPPKEATQKSMQIQGALVGIAMVLSAVFVPMMAFFGGSTGAIYRQFSITIVSAMALSVLVA  
LILTPALCATLLKPASADHHEKKGFFGWFNLTLEKSVGHYSNSVSGILRKTGRYLLLYLVIVGGMAILFLRLPTSFLPEEDQG  
VFMTMVQLPAGATQTRTQQVLDQIQNYLNQEKANVESVFTVNGFSFSGQGQNSGIVFISLKPWEERPGEENGVEAIV  
ARATRAFSQIKDGLVFPFNLPALIELGTATGDFDFELIDQANLGHTELTKARNQLLGMKEHPDLLVRVRPNGLEDTPQFKLD  
VDQEKALQALGVSLSDINQITISTALGGTYVNDFIDHGRVKKVYVQADAPFRMLPGDINNLYVRSANGEMVPFSTFSSARW  
IYGSRLERYNGMPSMELLGEAAPGRSTGEAMALMESLAAKLPNGIGHDWTGMSYQERLSGNQAPALYAIISLIVVFLCLA  
ALYESWSIPFSVMLVPLGVVGALLAASLRGLNNDVYFQVGLLTTIGLSAKNAILIVEFAKDLMEKEGRGLIEATLEASRMRL  
RPILMTSLAFILGVMPLVISHGAGSGAQNAGVTGVMGGMVLTATLLAIFFVPVFFVVRRRFRNRHHD

>AcrD\_C\_koseri

MANFFIDRPIFAWVLAIIILLCTGLTILSLPVEQYQPDAPPNVRITANYPGASAQTLNVTQVIEQNMGLDNLMYMSSQ  
SSGTGQATVTLFSVAGTDPDEAVQVQVQNLQSAMRKLPQAVQNQGVTVRKTGDTNLTIAFVSTDGSMQKQDIADYV  
ASNIQDPLSRVNGVGDIAYGSQYSMRIWLDPAKLNSYQMTAKDVTDAIESQNAQIAVGQLGGTPSVDRQALNATINA  
QSLLTQTEQFRDITLRVNQDGSSEVKLGDVATVEMGAEKYDLSRFNGNPASGLGVKLASGANEMETAKVLNRLDELA  
YFPHGLEKAYETTSFVKASIIDVVKTLLEAIALVFLMYLFLQNFRAITLIPTIAPVAVVLMGTFSVLVAFDYSINTLTMFAMVL  
AIGLLVDDAIVVVENVERIMSEGLSPREATRKSMGQIQGALVGIAMVLSAVFVPMMAFFGGTTGAIYRQFSITIVAAMVLSV

LVAMILTPALCATLLKPLHKGEHHGQKGFPGWFNRTFNRNAERYEKGVAKILHRSLRWILIYVLLLGAMVWFLRLPTSFLP  
QEDRGMFITSVQLPSGSTQQQTLKVVQEVEKYFTQEKDNVMSVSTVSGSPGGNGQNVARMFVRLKDWDERNATT  
GTSFAIERATKAFNKIKEARVYASSPPAISGLGSSAGFDMELQDHAGAGHDALMAARDRLIELAAQDSALTRVRHNGLD  
DSPQLQIDIDQRKAQALGVSIDINDTLQTAWGSSVYVNDFMDRGRVKKVYVQAAAKYRMLPDDINLWYVRNKDGGM  
VPFSAFATSRWETGSPRLERYNGYSAVEIVGEAAPGVSTGTAMDVMESLVRQLPTGFGLEWTAMSYQERLSGAQAPALY  
AISLLVFLCLAALYESWSVPFSVMLVPLGVIGALLATWMRGLENVYFQVGLLTVIGLSAKNAILIVEFANEMNEKGHDL  
LDATLHACRQRLRPILMTSLAFIFGVLPMASINGAGSGSQHAVGTGVMGGMISATILAIYFVPLFFVLVRRRFP LKPKPE

>MexDyB\_C\_koseri

MFSRFFVRRPVFAWVIAIIMLAGILAIKTLPAQYPDVAPPSVKISATYTGASAETLENSVTQVIEQQLTGLDNLLYFTSTSS  
SDGSVSIDVTFEQGTDPDTAQVQVQNKVQQAESRLPSEVQQSGVTVVKSQSNFLIAAVYDKSDRASSSDIADWLVS  
NQDPLARVEGVGSLQVFGAEYAMRIWLDPAKLASYSLMPSDVQSAIEAQNVQVSAGKIGALPSPDTQQLTATVRAQSR  
LQTVEQFKKIIKQSDGAVVRIQDVARVEMGSEDYTAIAKLNHHPAAGVAVMLAPGANALDTATLVKDKVAEFKRDMP  
QGYDVAYPKDSTEFIKISVEDVQTLFEAILVVCVMYFLQNLRLATLIPALAVPVVLLGTGVLALFGYSINTLTLFAMVLAIG  
LLVDDAIVVVENVERIMRDEGLPAREATEKSMGEIAGALVAIALVLSAVFLPMAFFGGSTGVIYRQFSVTIISAMLLSVVVAL  
TLTPALCGSILSHTAPHKKGFFGIFNRFYSRTEQGYQRGVLHVLRRSVSVMGVYALLCGAMALAMWKLPGSFLPTEDQGE  
IMVQYTLPAGATASRTAEVNRQVTDWFLNKEKANTDVIFTVDGFSFSGSQNAGMAFVSLKNWSEKGEENTAQAIAL  
RASKELGAIRDATLFAMTPPSVEGLGQSNQSGFELMANGATDRDTLLQMRNQLIAQANQSDILHAVRANDLPQMPQL  
QVDIDSNKAVSLGLGLSDVTSTLSSAWGGTYVNDFIDRGRVKKVYIQGDSEFRSSPADLGKWFVRGSDNSMTPFSAFATT  
RWEYGPESLVRYNGSAAEIQGENASGFSSGAAMDKMEALANSLPAGTTAWWSGLSLQEKLASGQAMSLY AISILVFL  
CLAALYESWSVPFSVILVIPLGLLGAALAAWMRDLNNDVYFQVALLTTIGLSSKNAILIVEFAEAAVAEGYSLSRAALRAAQ  
TRLRPIIMTSLAFIAGVTPLAITAGANSRVAIGTGIIGGTLTATLLAIFVPLFFVLVKHLFTRKSRRQE

>AcrB\_S\_flexneri

MPNFFIDRPIFAWVIAIIIMLAGGLAILKLPVAQYPTIAPPAVTISRFYPGADAKTVQDVTQVIEQNMTGIDNLMYMSSNS  
DSTGTVQITLTFESGTDADIAQVQVQNKQLQAMPLLPQEVQQQGVSVKESSSSFLMVVGVIINTDGMTQEDISDYVAA  
NMKDAISRTSGVGDVQLFGSQYAMRIWMNPNELNKFQLTPVDVITAIKAQNAQVAAGQLGGTTPPVKGQQLNASIIAQ  
TRLTSTEEFGKILLKVNQDGSRVLLRDVAKIELGGENYDIAEFNGQPASGLGIKLATGANALDTAAAIRAELAKMEPFFPSG  
LKIVYPYDTPFVKISIEHVVKTLVEAIIIVFLVMYFLQNFRLTIPTIAVPVLLGTFAVLAAGFGSINTLTMFGMVLAIGLLVD  
DAIVVVENVERVMAEEGLPPKEATRKSMMGQIQGALVGIAMVLSAVFVPMMAFFGGSTGAIYRQFSITIVSAMALSVLVALILT  
PALCATMLKPIAKGDHGEKKGFFGWLNRMFESTHHTDSVGGILRSTGRYLVLVLIIVVGMAYLFVRLPSSFLPDEDDQG  
VFMTMVQLPAGATQERTQKVLNEVTHYYLTKEKNNVESVFAVNGFGFAGRGQNTGIAFVSLKDWADRPGEENKVEAIT  
MRATRAFSQIKDAMVFAFNLPAILVELGTATGDFELIDQAGLGHEKLTQARNQLLAEAAKHPDMLTSVRPNGLDTPQFK  
IDIDQEKAQALGVSINDINTTLGAAGGSSVYVNDFIDRGRVKKVYVMSEAKYRMLPDDIGDWYVRAADGQMVPFSAFSS  
SRWEYGSRLERYNGLPSMEILGQAAPGKSTGEAMELMEQLASKLPTGVGYDWTGMSYQERLSGNQAPSLY AISLIVVFL  
CLAALYESWSTPFSVMLVPLGVIGALLAATFRGLTNDVYFQVGLLTTIGLSAKNAILIVEFAKDLMDKEGKGLIEATLDAVR  
MRLRPILMTSLAFILGVMPLVISTGAGSGAQNAGVTGVMGGMVTATVLAIFVVPVFFVVVRRRFSRKNEDIEHSHTVDHH

>AcrD\_S\_flexneri

MANFFIDRPIFAWVLTILLCLTGTALFSLPVEQYPDAPPNVRVTANYPGASAQTLNVTQVIEQNMTGLDNLMYMSS  
QSSGTGQASVTLSEKAGTDPDEAVQVQVQNLQSAMRKLPAVQVQGVTVRKTGDTNILTIAFVSTDGSMQDQDIADY  
VASNIQDPLSRVNGVGDIDAYGSQYSMRIWLDPAKLNSFQMTAKDVTDAIESQNAQIAVQQLGGTSPVDKQALNATIN  
AQSLQTPQFRDITLRVNQDGSSEVRLGDVATVEMGAKEYDYLSRFNGKPASGLGVKLASSANEMATAELVLNRLDELA  
QYFPHGLEKAYETTSFVKASIEDVVKTLLEAIALVFLVMYFLQNFRLTIPTIAVPVLMGTFSVLVAFGYSVNTLTMFA  
MVLAIGLLVDDAIVVVENVERIMSEGLTPREATRKSMMGQIQGALVGIAMVLSAVFVPMMAFFGGTTGAIYRQFSITIVAAM  
VLSVLVAMLLTPALCATLLKPLKGEHHGQKGFPAWFNQMFNRNAERYEKGVAKILHRSLRWIYVLLLGGMVFLFLRLP  
TSFLPLEDRGMFTTSVQLPSGSTQQQTLKVVQEVEKYFTHEKDNIMSVFATVSGSPGGNGQNVARMFIRLKDWSERDS

KTGTSFAIIERATKAFNQIKEARVIASSPPAISGLSSAGFDMELQDHAGAGHDALMAARNQLLALAAENPELTRVRHNG  
LDDSPQLQIDIDQRKAQALGVDIDDINDTLQTAWGSSYVNDFMDRGRVKKVYVQAAAPYRMLPDDINLWYVRNKDG  
GMVPFSAFATSRWETGSPRLERYNGYSAVEIVGEAAPGVSTGTAMDIMESLVKQLPNGFGLEWTAMSYQERLSGAQAP  
ALYAIISLLVFLCLAALYESWSVPFSVMLVPLGVIGALLATWMRGLENDVYFQVGLLTVIGLSAKNAILIVEFANEMNQK  
GHDLFEATLHACRQRLRPILMTSLAFIFGVLPMATSTGAGSGGQHAVGTGVMGGMISATILAIYFVPLFFVLVRRRFLPKPR  
PE

>MexB\_A\_vinelandii

MSGFFIDRPIFAWVIALVIMLAGGLSILGLPINQYPSIAPPAVSISVTYPGASAQTVQDTVQVIEQQNLNGIDNLRITSDSN  
SDGNMTITATFEPGTDADIAQVQVQNKQLLATPLLPQEVQQGIRVTKSVRNFLIVGFVSEDGSMRNDLANYIVSNI  
QDPLSRAKGVGDFQVFGSQYAMRIWLDPARLNNFQLTPVDVRNAVESQNVQVSSGQFGGLPAVPDQQLSATIIGKTRL  
QTAEQFRDILLKVNGDGSQVRLDDVAEVLGGENYSITSTYNGRPAAGMAIRLATDANALETAAQAVRDTLAELEPFFPPG  
VKVVPYDTPVISASIEEVVKTGEAIVLVFLVMYLFQNVLRATLIPTLAVPVLLGTFGVLAAFGFTINTLTMFAMVLAIGLL  
VDDAIVVENVERVMVEDGLPPREATRKSMGQIQGALVGIALVLSAVFVPMAFFGGSTGVIYRQFSITIVAAMALSVLVAL  
IFTPALCATLLKPVSRGEHHRKRGFFGWFNRSFERSVRGYERGVRLGRKLPYLLLYLAIVALMVWLFSDIPTAFLPDEDQ  
GVLYAQVQTPSGSSAERTQLVVDENRNYLLTEEGHLVNSVFTVTGFNFAGRGQSSGLAFISLKPWAERTGEEDDVFALA  
QRAQQRFAGFRDALAFAYAPPVMEGLNASGFDVFLQDRAGVGHEALSAARDQFLARAANKNPVLSRVRRANGLRDEPQ  
YRLIDDELARAYGVPLADINSSISIAWGASYVNDFIDRGRVKKVYLQGEPKARMTPEDLGKWFVRNAAGTMVPFSAFAN  
GEWTYGPPLKARYNGVSAMEILGEPAPGYSSGEAMAEVERIAEELPPGIGYAWTGLSYEERLSGSQAPALYALSLLVFLCL  
AALYESWSIPFSVMLVPLGVIGALCFTSLRGLSNDVYFQVGLLTTVGLSAKNAILIVEFAKDLHEQGMALPEAAVEACRM  
RLRPIIMTSLAFILGVVPLAVSSGAGAGAGSQHAIGTGVIGMLTATVLAIFWVPLFYVLVSSLFGDRRPEAADRGEVP

>MexB2\_A\_vinelandii

MSRFFIDRPIFAWVIALVLMLGGLAILKLSVTQYPNISPPAVQISVTYPGASAQTVQDTVQVIEQQNLGLDGLRYISSVS  
NADGSLQIIVTFEQGTNPDIQVQVQNKQLLATPMLPEEVQRQGIRVVKYQVNFMMILGLVSTDGRMNGFDMGNYIA  
SNLQDPISRUYGVGDFQVFGSQYAMRIWLDPEKLNNYQLTPQDVTSAISQNVQVSSGQLGGLPAARGVQLNATVIGK  
TRMRTADEFEKILLKVNDRDGSQVRLKHVAEVLGSAENFSIASKYNGMPAAGMALRLAPGANLLESVAAVRAKLDELKPYL  
PEGVEVVYPYETAPMVSASIEAVVHTLFEAIVLVFLVMYLFQNFRTATLIPTLAVPVLLATFGVLFACGFTINVMTMFAMV  
LAIGLLVDDAIVVENVERIMVEEGLSPKEATRKSMGQISGALVGIALVISAVFLPMAFFGGSAGVIYRQFSITIISAMSFVLI  
ALIFTPALCATLLKPVAKGAHHEKRGFFGWFNRTFERSADGYQRGVGGITRRRWSFMLIYLLLVGGVAYFLRLPGSFLPNE  
DQGTMFVQIQLPPNSSAERTEAVLAETRDYLLKDEGDTVASVSVNGFNFAGRGQSSGLFINLKPFSERPRPEQDIFALA  
QRAAVRYARIKDANVIPVPPAVREMGNATGFDLFLQDYGGLGHEALMAARNQLLGMAAKEPTLTMVRPNGMNDEA  
QYQVIIDDEKARALQVSIEDINETMSVAWGSSYVNDFIDRGRVKKVYVQGKQDSRVGPEDFDKWYVRNAEGGMVPFSA  
FASGQWIYGSPKLERYNGISSVEVLGQPAPGYSTGDAMAVMNRLAAQLPSGIGIAYTGLSYEELAAGSQAPALYALSLLIV  
FLCLAALYESWSIPFSVMLVPLGVLGAVGATLLRGLSNDVFFQVGMLTTMGLAAKNAILIVEFAKDLYEHQGRSLMQAA  
SEAARLRLRPIIMTSIAFALGVPLATATGPGSGSQHSIGTGVGGTLAATFLAIFVPLFYVVVVVGLFERQKDKAAETEGVM  
A

>MexFQ\_A\_vinelandii

MSLSHYCIERPIFASVISIVITLAGAVAMFNLPVAQYPDITPPQITVSATYPGADAIEVVANNVAAPIEQQVNGADDMIYMN  
SSSSATGNMTLNVFFEIGTDPSLAQVDVQNRVNALPQLPSAVQSQGIQVQKSSAFMMVIAVYSPDERYDSTYIANYA  
NLYILDAIKRIPGANQASIFGTPDYAMRIWLKPDRMAQLKITAADVQQAVANQNQQFAVGRIGQSPTGEAVEQSFVTT  
KGRLTEPEEFENIIIRAASGGAAIVRLRDVGRAELGQKDYSLRSTYQGKPATLMAVYQQPGANALDVSDAVRTTLAEMEKS  
FPAGIEYKIVMDTTAFTRTSIAEVVHTFFEALVLVAVVYLFLQSLRATLIPVLAVPVSIIVGTFIGMTALGFSINMLTLFGMVLA  
IGIVVDDAIVVIENVERNMQVHRLPPREAAKRAMDEVAGPVVAIVLVLCVAVFPVAFMGGITGQLYKQFAITIAISVVISGL  
VALTLSPALAAILKPAHGRKRGFFRWFERNFERMTEGYSRVAFMIKRFLALLLFAGMVVLTVLMAQRIPGAFLPPEDQG

YLLGAVIMPDAASLDRTGEVGRAVSDYFMRDEAVEGVAIVNGYSLLDSQNKNNAGTFFVGFKDFEERYKDDDESIRTQSAP  
AVIAAAGQAFSRVREGLVVPVNPSPGLGTTGGMEVWVQNKGDGSGVQLAGIVNDFVAKARQRPEIGAITATFNAASR  
QLLADVDREKAETLGVPVEDVYSTMQTMFGSLYVSQFNKFSRLWQVILQAEPTYRLRVEDLQQIYVRNRGGEMIPKALL  
STRYVTGPDLLTRFNNFPAVKITANAAPGFSSGQALAAETLAAQNMMSGDYALALSGEAFEEKKAGGTSAQVFVFLIMV  
FLILAAQYEKWTLPVGVLLAVPFALFGALLAILLRGLVNDVYFQIGLTMVLAALKNAILLIFEFAVLNREKGMVFDAAMTA  
ARERLRPIVMTSLAFILGCVPLAIVGASENSRHSIGTGVIGGMLAATVIAVFFIPLFYYLIERLSEKSGTAKQEAPPAEPAPLG  
GDLSGVPQRRREDD

>MexFQ2\_A\_vinelandii

MNFSQFFIHRPIFAAVLSLLTLIGGAIALFQLPISEYPEVVPPTVVVRANFPGANPKVIGETVASPLEQAIVGVEGMLYMSSQ  
ATSDGKLTLTITFALGTDLDNAQVQVQNRVTRTMPTLPTVEVQRLGVTVDKASPDLTMMVHLTSPDERYDMLYLSNYATL  
NVKDELARLDGVDVQLFGLGNYSRLRVWLDPHRVASRGLTAMDVDAIREQNRQVAAGSLGAPPAPGDTGFGLSINT  
QGRLVSEEFENIIVRAGEDGEITRLKDIARIELGSSQYALRSQLNNRPAVAMPVFQRPGSNAIDISDAVRARMAELKQSFP  
QGVDSYIVYDPTVFVRGSIEAVVHTLFEAIVLVVLVILFLQTVRASIIPLAAMPVSLIGTFAVMHLFGFSLNALSFLGLVLAIGI  
VDDAIVVVENVERNIALGKPPLEATRQAMQEVTGPIVATLVLCVAVFPTAFISGLTGQFYQQFALTIAISTVISAFNSLT  
SPALAAVLLKDHHPKDRFSRVLDRLLGGWLFGPFNRLFERASHGYVATVRHVLRGSAIALLVYGGLMGLTWLGFSTPT  
GFVPPQDKQYLVAFAQLPDAATLDRTDAVIQRMSEIAGRHPGVADTVAFPGLSINGFTNSPNSGIVFTPLKSFEERQDPSL  
SADAIAAELNRRFAEIQDAYIAIFPPPQVQLGTIGGFRVQVQDRGGLGYEELRQVQNVIAKSRTVPELAGLFTSYQVNV  
PQVDADIDREKAKTHGVAISDIFDTLQVYLGSLYANDFNRFGRTYQVNVQAEQFRLEPAQIGQLKVRNNRGEMVPLST  
FVRIEGSAGPDRVMHYNGFLTAEINGAAAPGYSSGQAEAAMERLLREELPGGMTFEWTELTYQQILAGNTAIFVFLPCVLL  
AFLVLAAQYESWGLPLAVILVPMTLLSAIVGVRIAGGDNVFTQIGLIVLVGLACKNAILLIVEFAKDRQAEGLDRIAIVLEA  
CRLRLRPILMTSIAFIMGVPLVLSSGAGAEMRHAMGVAVFSGMIGVTLFGLLLTPVFFVLVRAFVERREARRNRQALEAQ  
G

>AcrF\_P\_asymbiotica

MPKFFIDRPIFAWVIAIITMLAGLLAIMKLPVAQYPTIAPPAISISATYPGADATTVQNTVTQVIEQNMNGIDNLVYMSSNS  
DSAGNMNITLTFEAGTDPDIAQVQVQNKQLQAMPLLPQEVQQQGIHVDKSTNAFLMVAGFTSEDGSMSSQEDIADYVG  
ANVKDPLSRVTGVGDAMLFGNQYAMRIWLNPDKLINYKMTTLDVINAIIKAQNNQIAAGQLGGTPPVPGQRLNASIIAQ  
TRLTSPEEFSKILLRVNTDGSQVRLKDVAKVELGSESYNLIGRFNGKPAAGIGIKLGTGANALDTSKAVKEALKNMEPFFPH  
GLKIVYPYDTPPFVKISIHVVKTLEAIMLVFVVMYFLQNFRAFLIPTIAVPVLLGTFAILAAGFYSINTLTMFAMVLAIGLL  
VDDAIVVVENVVERVMQEEGLSPKEATKKSMMGQIQSALVGIAMVLSAVFVPMFAFFGGSTGAIYRQFSITIVSAMVLSVLVAL  
ILTPALCASMLKPIAKGSHGKQTGIFGWFNRLFDKSTHHYTDVSGRILRNTGRYLVIIYVLLVAGMAVMFTRLPSSFLPEEDQ  
GVLLTMVQLPAGATQEQTQKVLDEVNHYFSTEEDKRVSVFTVSGFGFSGQGQNTGLAFMSLKDWSERPGAENKVP  
VARASAHFQKIKEGMVFAFNVPAIVELGSATGDFELIDKANLGHDKLTEARNQLLGMIQQRPDMLVGVRPNGQEDTP  
QYRVRIDQEKAETLGVSADINSTLSTMFGSHYVNDFIDRGRVKKVYIQSEAPYRMLPSDIYKLYVRNKQGEMVPFSAFAD  
MSKEPWYGSPLERYNGLPSMEILGEAAPGKSTGDAMALMEELASQLPNGIGFDWTGMSYQERLSGNQAPALYALS  
VFLCLAALYESWSIPFSVMLLVPLGIVGALLATTFRGLDNDVYFKVLLTTIGLSAKNAILLIVEFAKDLMEKEGKGLIEATLD  
AVRMRLRPILMTSLAFMLGVIPLVLSNGAGSGSQNAVGTGVLGGMIAATSLAIFVVPVFFVVIKRRFSKKVEEIEPASESH

>AcrB\_Y\_enterocolitica

MAKFFIDRPIFAWVIAIIIMLAGSLAIMKLPVAQYPTIAPPAISISANYPGADATTVQNTVTQVIEQNMNGIDNLLYMSSSSD  
SSGNVQLTLTFNSGTDPDIAQVQVQNKQLQAMPLLPQEVQQQGVSVKSSSSFLMVAGFISEDGTMKQEDIADYVGSN  
VKDPISRTAGVGDVQLFGSQYAMRIWMDPHKLNNYGLTPVDVINAIIKVQNNQVAAGQLGGTPPVPGQELNSSIIAQTR  
LTNAEEFSQIMLKVNNTDGSQVRLKDVAVQLGAENYNIARYNGKPAAGIGIKLATGANALNTSAAVKAELAKLPFFPAG  
LKVVYPYDTPPFVKISINEVVKTLEAIIILVFLVMYFLQNFRAFLIPTIAVPVLLGTFAILSAFGYSINTLTMFGMVLAIGLLVD  
DAIVVVENVVERVMQEEGLPPKEATKKSMEIQIGALVGIAMVLSAVFIPMAFFGGATGAIYRQFSITIVSAMVLSVLVALILT  
PALCATMLKPIAKGEHGPKTGFFGWFNRMFEKSTHHYTDVSGNILRSTGRYLVIIYLAIVIGMGVFLRLPTSFLPEEDQGVF

LTMVQMPAGATQERTQKVLQVTDYYLDKEKDVVNSVFTVNGFGFSGQGQNTGLAFVSLKNWDERPGEQNKVPAIV  
ARASAAFSQIKDGLVFAFNLPAIVELGTATGFDQLIDQGDVGHQKLTEARNQLLGMAAQHPDMLVGMRPNGLEDTPQ  
FKVEVDQEKAQALGVAISDINTTLGSAMGGSYVNDFIDRGRVKKVYVQADAPFRMLPSDIDKWYVRNAGQMVSFATF  
SSAKWEYGSPRLERYNGLPSMEILGQAAPGKSTGEAMDLMQELASKLPSGIGYDWTGMSYQERLSGNQAPALY AISLIVV  
FLCLAALYESWSIPFSVMLVPLGVVGALLAASLRGLNNDVYFQVGLLTTIGLSAKNAILIVEFAKDLMDKEGKGLVESTLEA  
VRMRRLPILMTSLAFILGVLPLVISSGAGSGAQNNAVGTGVMGGMITATVLAIFFVPVFFVVRRRFRSRKNEDVEHAHAVD  
HKVK

>AcrD\_Y\_enterocolitica

MANFFIDRPIFAWVLAIIILCLTGALAISTLPVEQYPNLAPPNVRISASYPGASAQTLENTVTQVIEQSMTGLDNLLYMSSQS  
SNSGSASITLTFQAGTNPNEAMQQVQVQNLQSAIKKLPQDVQQQGVSVKSGDNTLMMVAFVSTDGSMKDQDIADYV  
ASNLQDPLSRIEYVGSIDAFGSQYAMRIWLDPNKLNYYQLTTQDIVTAIQS QNSQIAVGQLGGTPSVDNQALNATINA  
QSQLQTPEQFREITLRVNQDGSVLTLDGVAKIEMGAEKYDLSRFNGQPASGMSIKLASGANELQTDLVKARIAELTPFF  
PHGLEAKIAYETTPFVKASIKDVVKTLLEAILLVFLVMYFLQNFRA TLIPTIAVPVLLGTFAILSAFGFSINTLTMFAIVLAIGLL  
VDDAIVVENVERVMSEEGLDPREATRKSMSQIQGALVGIALVLSAVFIPMAFFGGTTGAIYRQFSVTIVSAMVLSVLVALI  
LTPALCATMLKPIKPGHHHAKRGFFGWFNRMFDRNAHRYERGVAQVLHHSVRYMLLYLLLGLLALLFIKLPSTFLPLEDR  
GVFMAQVQLPVGSTQQQTLRVVEKVENYFLTA EKNNVLSVFSTVSGSPGGNGQNVARLFIRLSDWEQRKDSNNSSFAI  
ERATKVFENKIAEAKVSVSPPAISGLGGSSGFDMEQLDHGGLGHDKLMAARDQLLQMASQDPALTRVRHNGLDDSPQL  
QIDIDQRKAQALGVSLDDINNTLKTAWGSTYVNDFVDRGRVKKVYVQSEATARMLPEDVNKWYVRNKNNGMVPFSAF  
STTRWEYGSPRLERYNGYSALEIVGEAAPGVSTGTAMDVMEGLVKQLPNGFGLEWTGMSYQERLSGSQAPALY AISLLV  
VFLCLAALYESWSIPFSVMLVPLGVIGAVAATWMRGLENDVYFQVGLLTIIGLSAKNAILIVEFASELNNKGKDLVEATLEA  
SRLRLRPILMTSLAFIFGVLPMAISQGAGSGSQHAVGTGVMGGMISATVLAIFFVPLFFVLVRRRFPGRPAHTKNSDTQ

>MexDYB\_Y\_enterocolitica

MFARFFIHRPVFAWVIAIVIMLGGAVAMQTLPIAQYPDVAPPSVSIKATYTGASAETLENSVTQVIEQELTGLDGLLYFSSSS  
SSDGKANIVATFKQGTNADTAQVQVQNKVQQA LTRLPTVEVQSQGVTVTKSQTNFLLMALYDEKDKHTGTDIADYMV  
NLQDPLARLEGVGSVQVFGSQYAMRIWLNPTKLAAYS LMPSDIQT AIEAQNTQVSAGKIGALPSGKEQQLTATVMAQS  
RLKTPEQFNNIIVKSDSTGAVVRLSDVARVELGNEDYSVTTRLNGHPAAGIAVMLAPGANALATAERVKAKAAEFELSLPD  
GYKIAYPKSDSTDFIKVSVEEVVKTLIEAILLVVIMYVFLQ NIRATLIPAIAPVLLGTGVLAIFGYSINTLTLFGMVLSIGLLV  
DDAIVVENVERVMREDNLPPREATEKSMGEISSALVGIALVLSAVFLPMAFFGGATGVIYRQFSITIVSAMALSVLVALTLT  
PALCAAFKPNHKPPSNTGFFGWFNRRHYDRMQTRYESMVGNVIHRSRLYLLIYAVLIVVMGILFIRLPTGFLPTEDQGDV  
MVQYTL PAGATSGRTMEVSKAVENYFLTQEKDNTKAVFTISGFGFSGSGQNAGMAFIALKNWSE RPSSENTATAIADRA  
MKALSIIRDAQIFSMTPPAVDGLGQSNQFTFELQAAGDTSREQLLTLRDQLIGNASKDPILTSVRANTLQQMPQLQVDID  
NDKAAALGLSISDVNATLSAAWGGTYINDFIDRGRVKKVYMQGDVDSRSKPEDINQW FVRGSSDAMTSFSFAATTRWIY  
GPETLSRYNGQASYEIQGQAASGSSSGTAMDRMEKLAAELPGTSYSWSGLSYQERLASGQALSILY AISLVFLCLAALYE  
SWSVPFSVMMVIPLGIIGAVAAAATLRGLENDIYFQVALLTTLGLASKNAILIVEFAEAAAYLRGEPLVAAALQGAATRLRPILM  
TSLAFVAGVMPLAISTGAGANSRISIGSGIIGGTLTATALAVFFVPLFFVLIRRVFSGKSKKTEHKG V

>MexFQ\_Y\_enterocolitica

MLHFFIRRPKFAIVIALVITIVGWVSLHVIPVEQY PDITPPVVSVA VYPGASARDVAQAIASPLEAQVNGVSNMLYMESTS  
GNNGSYQLSITFASGTDPDMAAVEVQNRISQVSAQLPAEVNENGISVRKRASNLLLGVS VFSQKQTHDALFVSNYTSIQL  
RDAIARINGVDVQVFGARDYSMRVWLN PQRMESLNVSVQDIIAALQQQNVQAAAGQIGSSPSTPDQQQTLTISGQG  
RLSDPQEFANVIIRS NPQGGMIRLGDVARVALGAQNYQVSAAQNQTESAFLVVYPVPGANALNVANGVRDEMARLSA  
SFPTDLTYEINYDSTLPVTATLHEIALSLTLT LIVLAVVYFLQNM RATFIVALTIPVSLLGTFAVLVYFGYSANTLSLFAILALT  
IVVDDAIVVENVERLLSNPD LTPAQATKQAMSQIAGPIIATTLVMAVFPAILPGIVGELYRQFAVTL SAAVILSSINAL  
TLSPALCAVLLKCR TLSTSGVFGGINRGLDSARDGYVSLTGRISSRAVFSIAALLLVGLATWWGYTRLPTSFLPEEDQGYFFV  
SLQLPDGASLNRTQTVMDQMYQQVTANDAVEDVIKITGFSLLSGNNSPNAGFAIVMLKPWGQRPHIDQVLANI QANL

AAIPSAMIMAVNPPAIALGSGFDLRIQALLGQTPQELAQVSQGVIFAANQDPKLSRVFTTFSASVPEINLSIDRDRAAL  
LQVPVSRIFQTLQTSLGGMNAGDFTLNRMFRVQLQNDMDFRQRSAQINSLNVRSDNGVLVSLANLVTLPVSGAPFI  
SNFNQFPSVAISGSAADGASSGQAMAAMEVLLAQNLPPQGYSSWSGMSWQEQQTGGQVFIYLAALVFAYLFLVAQY  
ESWSIPLVVILSVFVAVGGAVAGLSAMGFANDVYAQIGLVLLIGLAAKNAILIVEFSKARREEGATIAQAAQDGAKQRFRA  
VMMTAISFILGVMPLVFASGAGAMSRQIIGITVFGGMLMATAVGILFIPALYLHIQRLREWTKTRKPPADKDPQH

>AcrB\_A\_pleuropneumoniae

MKFTDIFIKRPLAVCISLLITILGLQSINKLQVREYPEMTISIVTVKVNYSAGADASLMQALVTSQIEEAVAQADNIDYVTSSS  
GPSSTTTTIKMKLNTNPQMALADISAKVNAIRANLPSGIDDPISVSSGSNDALMYIRFVSDDELSTPQITDYINRVVKPQFFT  
VNGVSSVDIFGAANFGLRIWLDPKMAGNNLSGAAVLSALSANNLNTAAGNANGYYTVYKNKVESSTPSVEELENVTIS  
TTSDGRIVKLKDIKVELDKYQDASRAIADGKEAVVLAVSAATTANSLTVAKDIYPVFDLITKNLPSSVNGQIMYDKTVAIN  
SSINEVIKTIGEATVIVLAVIILFLGSLRAMIVPIITIPISLIGVLFLLQMFQGSINLLTLLALVLAIGLVDDAIVVLENVERHVKEGK  
TPFDAIIGTREIALPVISMTITLAAYVSPMALMEGVTGSLFKEFALTLAGAVFISGIAALTSPMMSSRVLKEHNEENESRFS  
KCINTMLDKMTACYTNMLRGVMSVRWLVVIFAMSIFAVLPTLLTSLSEVAPTEDRGFVVIGINGPSNTNLDYTAATEK  
FNEDVGKIPEVASMMTVSGFNGANSALSIIKLDWSEERERERKPISADVSAIAKNVVGMDINAISFEISTGENGLPFSLVIT  
TADNYVKLADVANDFLKKAQASGQFFFSSLDLKFDVTMTKWKFDREKMGTYGVTMQQVSGTLGAYLSGAIITRVDIDSR  
AYPIVSQAVRQDRNLNPQDLVNYVYTTASGESVPLSSFSLELSTEPAALPRMNQLNSATISGVVSSSIGDAVNWAKAELD  
RSLPQGYQYDFKSEARQYVQEGNAMAMTFALAVVIYLVLAIQFESWRDPMVILVSVPLALSGALVVLNVLGIAGIAGATL  
NIYSQVGLVTLVGLITKHGILMCEVAKEEQLHNGLSRFDAIVHSATIRLRPIMMTTAAMVAGLIPLLFAMGAGAIARFSMG  
MVIVAGLSIGTLFTLVLPVIYTFGLQEHKPLREFDEEKYAKASVEKIEHTGM

>AcrB\_S\_proteamaculans

MAKFFIDRPIFAWVIAIIVMLAGVLSIMKLPQYPTIAPPAVSISANYPGADAKTVQDVTVTQIIEQNMNGIDNLMYMSSTS  
DSSGSVTITLTFNSGTDPDIAQVQVQNKLSLATPLLPQEVQQQGLKVEKSSSSFLMVAGFISDDPSMTQDDIADYVASNI  
KDPIRSSGVGEVQLFGAQYAMRVWLDPNKLNNFQLTTTDDVTSATEQNNQIAAGQLGGMPVPVPGQQLNASIIAQTRL  
TSPEEFGKILLKVNADGSQVRLSDVAHIERGAESYAVTARYNGKPAAGLGKILATGANALNTAQGVKDALTQMPPFPQG  
MKVVYPYDTPFVKISINEVVKTLIEAIIIVFLVMYFLQNFRTLIPTIAPVVLGTFAILAAGFGSINTLTMFGMVLAILLV  
DDAIVVVENVERVMSEGLPPKEATKKSMEQIQGALVGIAMVLSAVFVPMAFFGGSTGAIYRQFSITIVSAMALSVLVALIL  
TPALCATLLKPVAKGDHGVKTGFFGWFNRMFEKSTHHYTDVANILRSTGRYLVIYLLIVVGMALLFLRLPSSFLPDEDQGI  
LLTMVQLPAGATEARTSKVLEEVDYFMTKEKDNVSVFTVAGFGFNGNGQNNGLSFVSLKDWSEKGEENKVPPIAGR  
AMGAFSQIKDGLVFPFNLPPIELGTATGDFDQLIDQGGGLGHEKLTARNQLLGMAAKHPDMLVGMVRPNGLDTPQFKLI  
IDQEKAKALGVSITTINSTALGGSYVNDFIDRGRVKKVYVQADAPFRMLPEDINKWFVRGTSGQMVPFSAFSSAKWE  
YGSPLRLERYNGLPSMEILGQATPGKSTGEAMNLMEELASKLPSGIGYDWTGMSYQERLSGNQAPALYAISILVFLCLAAL  
YESWSIPFSVMLVLPLGVIGALLAATMRGLNNDVYFQVGLTTIGLSAKNAILIVEFAKDLMDKEGKGLIEATLEAVRMRLR  
PILMTSLAFILGVLPLVISSGAGSGAQNAVGTGVMGGMITATVLAIFFVPVFFVVRRRFSKKSSEDVEHSHPDH

>AcrF\_S\_proteamaculans

MSNFFINRPIFAWVIAIIVMMAGALSIMKLPQYPTIAPPAVSISATYPGADAKTVQDVTVTQVIEQNMNGLDGLMYMSS  
NSDAAGNATVTLTFATGTDPDIAQVQVQNKLLAMPPLPQTVQDQGINVQKASSSFLMVAFTSDSSAMTQADLADY  
AVANIKDPIRSTSGVGQVQLFGAQYAMRIWLDPNKLDNYQLTSEDVVRKAQNNQIAGGQLGALPAVPGQQLNASII  
AQTRLSSPQQFGNILLRVNQDGSQVHLRDVARIALGSENYTTSAEYNGKPAAGLGKILATGANALDTANAVKAEIGRLE  
PYFPAGMHVVYPYDTPFVKISIGEVVKTLIEAIIIVFLVMYFLQNLRTLIPTIAPVVLGTFAILAAGFGSINTLTMFGMVL  
AIGLLVDDAIVVVENVERVMTEGLPPKEATRKSMQIQGALVGIAMVLSAVFIPMAFFGGSTGAIYRQFSVTIVSAMVLS  
VLVAMILTPALCVTLKPGVHAPKTGFFAWFNRLFERSTQHYQGSIGNILNHTGRMLLIYLLVIGMALLFIRLPTAFLPDED  
QGVFMNMIQLPAGATQQRTEAVLGQVTHYYLNKEKANVNSVFTVAGFGFNGNGQNNGLAFVSLKDWQRPGKKNK  
VEAIIKRANMAFAHTIKQGIAFANLPAITDLGTATGDFELIDNGGLGHAALTAKARNQLLFMAAKYPNVATKIRPNGLDTP  
PQFKVDVDQAKAEALGVSVDINQTLSTAWGGTYVNDFIDRGRVKKVYVQADAPYRMLPDDLNQWYVKGNRGQMV



PFSAFASAHWEYGSPRLERYNGLPSMEILGEPAPGRSSGQAMMLMEKLAAKLPKGIGYDWTGMSYQERLSGNQAPALY  
AISLVVFLCLAALYESWSIPFAVMLVPLGVVGALLGATLRGLNNDVYFQVGLTTIGLSAKNAILIVEFAKDLMEKEGKPLI  
AATLEATRMRLRPILMTSLAFILGVLPVLSSGAGSGAQNAVGTGVMFGMISATLLAIFLVPVFFVVVQRRFGRK

>MexDyB\_S\_proteamaculans

MAQFFIRRPVFAWVIAIIIMLCGLMSINSLPISQYPDVSPQISISATYPGADAETLENSVTQVIEQQLTGDLGLLYFSATSSS  
DGSVSINVTFDQGTDPDIAQVQVQNKVQQAESRLPAEVTAQGVTVKKSQSSFLLVGLYDETDKASMADISDYLVSNIQ  
DPLSRIDGVGDVQVFGSEYAMRIWLNPTKMASFSLMPSDVETAIEAQNTQVSAGKVGDLPSGADQQLTATVKAQSRLQ  
TPEQFRNIIKSDSSGALVRLGDVARVELGNEDYSSSARLNGHPASGIAVKLAAGANALNTAKLVKAKVAEYQTSMPHGY  
KVAYPKDSTDFINISIEEVVKTLIEAVVLVIVMFVFLQNLRTTLIPTITVPVLLGTFGVLAAGFYSINTLTLFGMVLAIGLLVD  
DAIVVVENVERVMREEKLPPREATEKSMKEITGALVGIAMVLSAVFLPMAFFGGSTGVIYRQFSVTIVASMVLSVILALTLP  
ALCATLLKPAHEELTNKGLLGKFNRYNRLQEKYADKVGRVIHSPMRYLLLYGLLLIAAAMVMYMLPTGFLPNEDQGVVM  
VQYTLPAAGATNARTSAVSDEVKDYFLNDEKANVSTIFTINGFGFSGSGQNAGMAFVSLKDWSLRSGSANTADAIKRAM  
AHFAKIRDAQVFSMSPPAIDGFGQSDGFTFELQAKGATTRAEQVMRDQIIAAAAKNPSLSAVRANTLPDTPQLQVEIDN  
DKLQALGLSNSDVSTLTNAFGSTYINDFIDNRNVKVKVMQGDVEYRSKPEDLEKWFVRGTSSSGTTSMTPFSAFASHW  
IYGPENLSRYNGLSSFEITGEGAPGTSSGTAMDEMAKLAAKFSSASSFSWSGLSYQERLTSGQAGSLY AISLVVFLCLAAL  
YESWSIPFAVMMVPMGVVGSLLAITLRGLENDIYFQVALLTIIGLSAKNAILIVEFAEEKYLGETLIAAAVEASRMRLRPIL  
MTSLAFSAGVLPLAVSSGAGANSRIAIGTGIIGGTITATILAIFFVPLFYVLVRRMFSRKTTVAKPLENTAPQAGE

>MexFQ\_S\_proteamaculans

MDFSRFFIDRPIFAAVLSILIFVGGVIAIPLLPISYDPDVPPSVQVRAQYPGANPKEIAETVATPLEEAINGVENMMYMKSV  
GSDGVLVTTVTRPGTDPDQAQVQVQNRVAQAEARLPEDVRRQGVTTQKQSPALTLVVHLVSPSGKYDSLYLRNYATL  
KVKDELARLPGIGQVQIFGAGEYAMRIWLDPNKVASRGLTASDVVSAMQEQNVQVSAGQLGAEMPTRSDYLLSINAQ  
GRLQTEEEFGNIIKSGDNGEVVRLRDVARIEMSGSYALRAQLNNKDAVGIGIFQAPGANAIELSNVRAKMAELSTRFP  
DGMSWQAPYDPTVFVRDSISSVVDTLLEAVLLVVLVILFLQTRASIIPLLAVPISIVGTFAALYLLGFSNLTLFLGLVLAIGI  
VDDDAIVVVENVERNIEGLSPLAAAHQAMREVS GPIIAIAVVLCAVFPMAFLSGVTGQFYKQFAVTIAISTVISAINSLT  
PALAALLKPHGAPKDMPSRLIDRLFGWLFRPFNRFFASSSQRYQRGVSRALGKRGAFFVYVLLCAAGVMFKTVPGGFI  
PTQDKLYLIGGVKMPEGASLERTDAVIRKMSAIGLSVDGVTDAVSFPLNALQFTNTPNTGTVFFAESLSTRTRSAAQIN  
AEINAKISQIQEGFAFSIMPPILGIGQSGSYLYIQDRAGLGYGALQTAINTMSGAIMQTPGMGFPISSYQANVPQLDAKI  
DRDKAKAQGVPLNALFSTLQTYLGSSYINDFNRYGRTWKVMAQADGQFRDSVEDIANLRTRNDKGEMVPIGSMVSISTT  
YGPDPVIRYNGFPAADLIGDADPRVLSSSQAMSELTVMASKLLPNGMNIQWTDLSYQQSTQGNAIIVFPVAVLLAFLAL  
AALYESWTLPLAVILVPMTMLSAFGVWLTGGDNNVFVQVGLVVLMLGLACKNAILIVEFARELELQGKSIMEAALEACRL  
RLRPVMTSIAFIAGTIPLILGHGAGAEVRGVTGITVFSGMLGVTLFGLFLTPVFYVTLRRMVTRKTRQPVAE

>AcrB\_P\_ingrahamii

MKFTDIFIRRPVLAISISLLLVLLGLQALNKMVREYPTMTNTVVNVSTSYGANADLIQGFITQPIEQAIQAANNIDFITSQ  
SYMGNISKISVFMNLNTDPSGAVADILAKVNSVRSQLPSEAEDPSIDMSTGSSTSVIYISFSSEQLNSSEITDYLERIIPQLFSI  
NGVAKVNLYGGTKFALRIWLDPERMAGFGLTTADVQILQANNIQSAAGQTNSYTLNNSNVGTQVETGAELNLIAT  
SGDGKVIRLQDIARVSLEKSHDVYRAMANGEDAVVVAIDAAPTANPLDITAGVRDMLPALAKNNPSSINMKVLYDSTIAI  
EESISEVIKTIAEAGFIVLLVMILFLGSWRAVPIIPIIPLSLIGVVVMQLFGFTLNLMTLLAMVLAIGLVDDAIVVVENIDRHIK  
AGEDPFRAAILGTREIAVPVISMTITLAAVYAPIALMGGITGSLFTEFALTLAGAVFVSGIVALTLSPMMCSKLLKNNQKPNR  
FERNVESVLSSITRGYGRLLDKLMTRRPVILYACLVFISLPFLFNSIPSELAPKEDKGALMVMMAKAPANANLDYIENSMRIIT  
GELAKQPEVTSSLAMSGIPNSNQAFGIAIMKPWSQRDKSPKELSASLMPKFNSVAAVATTAFQMPPELPGSSGGLPVQFVI  
TTGNQFESLVSIASDVLAATQASSNFVYSTLDLAFDSATMNIQIDRDKAGAYGVTMKDIGFTLGTLLSDGYLNRIDLNGRS  
YEVIAQVERKYRLSPQKLGNFYVRAKNGDMIPLSSLITIDVTAEPRLAHFNQLNSATVGAVLSPGVAMGDAIDFFEGIAET  
KLPQGYSHDYLGEARQFVTEGSALYMTFVLAILIIFVLASQFESIRDPLVILLTVPLAISGALVALAWGAATMNIYTQVGLITL

VGLITKHGILIAEVAKEEQLHHGLNRIDAVKKAATVRLRPILMTTAAMVAGLIPLLFATGAGAVSRFGIGIVIVAGLSIGTLFTL  
FILPVIYSFIASKHQPRQEFDETLEHKVKDHEH

>AcrB\_P\_multocida

MRFTDIFIRRPVLAVSISLLIILGLQAIKLAVEREYPMTTTTVINVSTVYPGADASLIQAFITSKLEEAVAQADNIDYLSSKSSP  
NNSLITIKMKLNTEPNGLADVLAKVNSVRSQLPRGIDDPVITSSTGGTGMMYIQFSSTKLDASQVTDYIERVIKQPFFTVE  
GVAEVQIFGASDYALRIWLDPAKMAAQNLSAMAVRNALSSNNVQTAAGNDNGFYVTKYKNKVETTTKSVEELGNLISSQ  
GDKLVRLRDIADVELNKSSDSSRAVANGFESVVLAINPTSSANPLVVAENVRPLYEQIKQNLDPDSMQAEILYDTTIAINSSID  
EVIKTILEATIIVLVVITLFIGSLRAILPVITIPISLIGVIMLLQAFDFSINLMTLLALILAIGLVVDDAIVVLENVDRHIKLGEPFRA  
AIIGTREIAVPVISMIALMAVYSPMALMDGITGSLFKEFALTLGAVFISGIVALTLSPMMSSKLLKPHTDPSKLEQCIKML  
TTINQGYNYALNLVMASRRCLAFAAVIFATLPFLNGLASELTPAEDKGAFMVGIRAPSNVNVVDYVQEAMHEYEQILKD  
TPEVDFSMVISGAMGSNQSFVVTWKDWKERTSQAELAEINKKSAAHIPEVALTGFNFPPOINTGEQGPPIGFVISTASGYE  
DLANVAENFLQEMKKS GHFVYTALDKFDTAQMRIKVDKEKAGTYGVTMQQISATLGSFSLAATIERVIDIDGRAYRIIMQ  
VKRGERLSPESLNNYYVTASNGKSVPLSSFLTMTLESQPTSLPRFSQLNSAVISAVPLPTKSTGEAIAWLKMAAKEYLPQGY  
NYDFTGEARQLVQEGNALAVTFVLAVVIFLVLAIQFESIRDPVIMISVPLAVSGALLMLNLFGLFFRIPGTSLNISQVGLITL  
VGLITKHGILMCEVAKEEQLQHGNRERIAEAAKVRLRPILMTTAAMIAGLIPLLYASGAGAVSRFSIGIVIVSGLAIGTLFTLF  
VLPVIYSIATEHKPLPEFDESILPLTDNSAH

>AcrB\_M\_succiniciproducens

MKFTDIFIKRPVMAIAISMLIVILGLQAISKLAVEREYPMTTTTVITVSTTYAGADAGLIQAFVTSKLEEAIQADNIDYLSSTS  
PSSSTITVKMLNTDPASALADVLKSVQSVRSELPSEIDPTLTSTGGSGIMYISFRSDKLHPSQVTDYIERVVKPQLFTVEG  
VAKVQVYGAAEYAMRIWLDPPQLAGQNLSTQVTTALSNNNVQTAAGSDKGYFNIYRNKVETTTNTVEDLGNLIVYSD  
GDKLVRLRDVADVELNKESDDTRAAANGSDAVVLSIEPTSSANPLTVADNIKPLYETIKKNLPDSIESNLYDRTVAINSSIN  
DVIHTIIEAVVIVLVVIMMFIGSLRAIFIPIVTIPISLIGVIFMLQMFDFSINLMTLLALILAIGLVVDDAIVVLENVDRHIKEGETPF  
RAAIIGTREIAVPVISMIALVAVYSPMALMGGITGTLFKEFALTLGAVFISGIIALTSPMMSAKILKHESSKFEKVNRTLK  
LTTGYTYILGLVMQARKAILLFAVIFATLPILFSSLSSELTPAEDKGGFLGMVTAPSNVNVVDYVQQATKPYEILNNTPEKQY  
SQVIAGAPNTNQALVITTLKDWAEERSQAEMAEITKAAAIAPEVSISAFAPPEIETGEQGPPVVFVLSSPGSTKELAQTA  
ETFLDKIRKSGKFVYSNLTKYDVAQMRIQVDKEKAGTYGITMQQIASTLGSYLSEATITRVIDIDGRAYKVISQVKRENRLSP  
ESLKNYYISASNGQSVPLSSLLTVELEPQPYSPLPRFSQLNSAEIQLVPSPTTTTGDAIAWLKDAADLPQGYSYDWKGEAR  
QLVQEGNSLATTFILAVLIIFLVLAIQFESIRDPFVILVSVPLAISGALLTLNLSFLGVTGVTLNISYSEVGLITLVGLITKHGILMCE  
VAKEEQLNHGKTKMEAIMTAAQLRLRPILMTTAAMIAGLIPLLYASGAGAVMRFSMGVWVWVAGLAIGTLFTLVLPVIYTYI  
GSNHKPLPEFDENAPRIGSSH

>AcrB\_P\_profundum

MRFTDVFIKRPVLAVSISFLIALGLQAIFKMQVREYPMNTNTVTVTTSSYYGASANLIQGFITQPLEQAIAQADNIDYMTS  
SSVLGSSTITVTMKNLNDPANGALADILAKTNSVRSQLPKESEDPTVTMSTGSTTAVMYIGFTSDELVSSQITDYLERVVTPQ  
LFTVNGVSKVDLYGGLKYALRVWLDPPKMAAYNLATDVMSVLNANNYQSATGQAVGEFVLYNGTADTQVSNTDELA  
KLVVSTKNGQVIRLGDIAKVSLEKSHDIYRASANGEEAVVAAINAAPSANPINIAADVLTLLPELKRNMPSNIKMNVMYDS  
TAINESIQEVIKTIVEAALIVLVVITLFLGSFRAVLPIITIPLSLIGVALVMQMFGFSWNLMTLLAMVLAIGLVVDDAIVVLENV  
DRHIKLGEPFRAAIIGTREIAVPVIAMTLTLGAVYAPIAMMGGITGSLFKEFALTLGAVFVSGIIALTSPMMCSKMLKANE  
KPSKFESTVHSFLDRMTNRYEKMGGVMTMRPVVIVFAAIVLVSLPLLKFIPSELAPSEDKGVLMMMGTAPSANLDYIE  
NTMQEVNKM LSDQPEVAYA QVFSGVPSSNQAFGIASMVPWVSEREASQAEVVKRVTDLVKDVPMAVTAFAQMPPELPG  
AGSGLPIQFVITTPNQFESLFQVTTDILTAVKNNPMFVYSDLDLNYDSATMKISIDKDKAGAYGVTMQDIGITLSTMMAD  
GYVNRIDLNGRSYEVIPQVERKYRLNPESINGYYVRTADGKAIPGLSLITIDVVAEPRALPHFNQLNSATIGAVPAPGTAMG  
DAINWFQTEAVDKLPSGYQYDFMGEARQYVTEGSALYMTFALALAIYLVLAIQFESLRDPLVILVSVPLAICGALIALSWG  
AASMNIYSQVGLITLIGLITKHGILICEVAKEEQLLHQKNRMEAVTEAAKVRLRPILMTTAAMIAGLIPLLYASGAGAAQRFSI  
GIVIVSGLAIGTIFTLVLPVIYTYLASVHKPLPIFMEDKDLEKLKRADEARNALKARDC

>MexFQ\_P\_profundum

MLSRFFIQRPKFALVISIILTLAGAIAALNLPVAEYPKISPPSVGVTAYYSGASAEVVEEAIADPIEASVNGVENMIYMSSKSAN  
DGSYSLNVTDFDIGTDPDMAQVNVQNRISQIESKLPAEVRMVGVTVKKRSPDLLMVLNFYSPDGKYDDKFLNNYINLNVK  
DQLARVKGISEVNVLGGGEYAMRVWLNPEKMANLGLTTADVNAALTEQNVQVAAGQVGAPPYNNAQEVQFNLVTK  
GRLETVEEFEDVVLRRANNDGSIVFLKDVARVELGKKFYTVNGMFRDQPAAIVTLNLQSDANALESBGDAVMSLLDGMNK  
NFPEGMAYETSYDITLFAESIKGVVVTLIQAIIILVAVTYMFLGSMRSTLIPVVAIPVSLIGTFAIMLAAGFTINTVTLFGLILAI  
GIVVDDAILVIENVDTNMARDPSLSRQATLIAMKEVTGPIITSTMVLLAVFIPVAMLPGITGIMYRQFALTICISVVISSINAL  
TLSPALCSLVLKQGDGNKSRWFQTFNKGLDKVTLKYGSIAGYLVKRSVLLVTFILAVGAVTYLSKTTSTAFVPTEDKGILLV  
NVQLPDSASLSRTEETIKLQDILAEPEGIEGIVANGYAFLTGAASNGASLFIKLKEWGVNRNEMEGEHSSFAISNRINARS  
ATELPEAIVFAMGAPAVPGMGAASGFEVLEDTLGRSRTDLANVMGEMIQKANQQPEIQFTSTFRANVPHFYVDIDRV  
KAKQLGIPLTDIFQTLQGNLGS MYVNDFTLYGKNFRVTQADSEYRDNLDTLRFHVRSASGDMIPLSTLTISIEQVFEPDV  
AWRYNMYRSAVIQGS PAPGYSSGDAIAAMERVAADVLPQGYQYEWGTGMAYQEVKAGNQAIYAFALALIFIYFLVAQY  
ESWSIPLAIIILVVPVATLGSFLALAMTGTPNLNYAQIGLVLLIALAAKNAILIVEFAKIEREENELDIEKAAVRGGKLRFAVNM  
TSWSFILGILPLIFASGAGHISQNSLGLSLTGGLLCVLLAGTILIPGFFSLVQKRREKFHGGSTKLIVLEDEK

>MexFQ2\_P\_profundum

MKFSHFFITRPIFASVLSILILIAGGLSLPNLPISEYPEVVPPTVVVRTAYPGANPKVIAETVSAPLEEEINGVEDMLYMFSGQTS  
DGRMTLTITFALGTDLDKAQVQVQNRVSSALPRLPQEVQRLGVTTTEKASPDLTMVVHLFSSDGQRTSQYLANYADIYVK  
NQLRLGGVGDVQLFGGDKYSIRVWLNPEIASRNLSTQDVLNAIRQQNTQVSAGSLGAQPASSDNEFEYLLNVKGRGL  
GSLEEFQIIVRVTPEGQITRLKDLARVELGQESYALRATLNGKEAVAIPVFQRPGANALELSSQVRDLMAGLSNNFPDGVE  
YKIAVDPTVFDVSSIDAVIHITLVEAIGLVVIVVILFLQTVRASLIPIAVPVSLIGTFAVMQLLGVSINTLSLFGMVLAIGIVVDD  
AIVVVENVERNIANGLSPVDATRQAMNEVTGPPIIALVLCVFIPTAFISGLSGQFYKQFALTITITISAFNSLTLPALSALL  
LKGHDEKPDLFTRLLNRLFGRWLFTPFNKVFDKGASGYEKVVKKLIRFSVIVGVYILGLLVATGKIYSSVPGGFIPAQDKQYL  
VAIAQLPDASSLDRTADVIKEMENIALETEGVQNTIAFPGLSVNGFVNASNSGIVFINLDDFENRLSPELSASQVANTLNGK  
FSVIGEGFVAVFPPPPVQGLGTTGGFKLYVEDRENAGFERLSNLQTVVMAANQRPELAGVYSSFRIQVPQYDIDIDREQV  
LLKQVPINSVFDTLQTFGLSTYVNDTNMFGKTYQVNAQAAPERYVNSEQILSLKVKNIHGDMVPLSTFVSIEPTTGPDRV  
MRYNSYVSADVNGAAAPGYSSDQAQAAMIEVLKTHLQDGMHYEWDVVYQQIIAGNTMIYIFPLVILVFLVLAQYES  
LKLPMAILIVPMTIFS AVGGVWLTNGDNNIFTKIALIVLIALATKNAILMVEFAREKTNEGISHLDAILIACRLRLRPILMTSIAF  
TAGVPLVAVATGAGSEMRQAMGVAVMYGMVGVTFFGLLTPVFYFAMTYKKKKS

>MexFQ\_L\_pneumophila ("MexQ")

MKIALFFIDRPVFATVISIIIVMGVLSYFNLPVEQYPQVVPPTIQVYASYPGANAKTVAETVATPIEQEVNGVENMLYMDS  
QSTDDGQMRLTITFKLGTDLDAQVVLVQNRVAVVEPKLPEEVRRLGITTNKNSPDLMLVNMYSPPNGQYDQTYIGNYAI  
LHIRDKIRRIEGVGNVLFVGASEYAMRLWLNPDLMNTFNLTANDVLAAVRAQNVQVASGKLNLPQKKQYGFYHIETK  
GRLVKKEEFENIIVKSGESGRIVRLKDIGRVELGTQNYLTKGYLDKYPAVALPIYQRPGTNALATAQEIIKTMKTIKDFPPGIT  
YDMAYNPTLFVQQSIDAVFHTIYEIALVVLVILFLQTVRASAIPVVAIPVSLIGTFAVMQAIGFSLNYLTLFGLVLAIGIVVD  
DAIVVVENMERNIQAGMNPRDAARKTMTVEGSALVAMGLVLI AVFLPTVFLEGISGRFYQQFGTTLAVATAISVFSLTLT  
PTMAVLLLRHHGTIKQEGLAWWWKKPIYGFLHGFNRLMEGFSRQYGKLVATLTRKTALMIIAYGIFISITLLLFVYVPRGFIPR  
QDQGYFIVAVQLPPGASLSRTDAVINKAVNKILAIPGIAHTVSFTGFSGATFTNSSNAGAIPTLLSFQERQRMGINYNDIL  
KRLRQELSTIKEALIVVIPPVPVRGIGNAGGFKMMLQDRGGRGLDVLMEAAATMVNAANQEKATTSVFTFFENSTPRLHL  
KLDREKVERLNVPIYANVVEALEVYLGSVFINEFNYLGRTRFVIAQADSEYRHTEDDILRIKVSNSGDMVPIGSVAQIENTV  
APSRMPRFNLPAIDLQGDVAPGYSSDEALVTMEKLAQNNLPDGIGYEWTEIAYQQKMVGNTALMAFTLGIVIFLVLAA  
QYESWSLPLAVILVPMCLFSSMLGVKILGMENNIMTQIGFLVLIGLASKNAILIVEFARQLENRGYNLWKAIIQAALRLRP  
ILMTSFAFILGVFPLIISTGAGAEMRRALGVAVFSGMLGVTFGLVFTPLFYVLISRLSRYKRKLKDLN

>MexFQ2\_L\_pneumophila ("MexF")

MISKFFIERPVLANVIALFIVFIGIIAIVLPVSQYPAIVPPTIQVTTTYPGADAKTLINTVALPIEQQVNGVEDMLYMQSTSTS  
GGTYTLIVTFAIGTDLNYAQVLVQNRVQAAMAQLPESVQKQGVIVQQKSTAILQFITLTSKNNEYDGVFLDSYATINMQD  
ELSRPGVGNVVVFGSGSYAMRVWLDPKKMLAFSLNPSVDLNAISYQNKEVSAGQLGAPPTVGKQAYQFTVNVPGQLS  
DPKEFENIIKTIDTPPDQNSSASSSAQVVRIRDVGRVELGSESYNQLANLNGKPTAAIGIFQLPGANALDVAQEVKAVAK  
MAKQFPPGLEYSIPFDTTVFVKASIEEVYKTLFEAGILVLIVVFLQNFRASLVPATTVPVTIIGTFFAMLLLGYSINLLTLFALV  
LAIGIVDDAIVIVEGVTQHIEKGLSPKESAILAMKELFGPIIGITLVLMAVFVPAGFMPGLTGSMYAQFALVIAATAFISAINA  
MTLKPTQCALWLKAPDTSKPKNIFFQAFDRIYNPIESAYVKFIDRLVHRSGKVCLIGIILVACAIYGLTRIPTGFIPMEDQGYL  
MLSIQLPDGASLGRTDEVSRSLAKKASEVGGVDNVIAIDGISLLDNNLSLSNAGVIYVIFKDWVSRGKSENLRALYTKFNAI  
AKETLDAKVLVVVPPPIQGLGMSGGFQMQVELQDGTDFYRKLQQATDQMINTGRQYPQLQNLMTTFRASVPQVAAP  
NRTKAESLGRVADAFDTLQTYLGSSYVNLFTKFGQVFPVYVQADASSRVSSDLRNYYVRNQSGSMVPLGTLTDVGPA  
VGPSIISLYNLPSNNINGVAARGYSSGQGIQVMEKLAKEQLPPGISYEWSTAYQEKVAGNLSYFIFALSLLVYLILSGQYE  
NWLIPSAILSVPLTLVGTVLALGSLGMDNNMYTQIGLLLLIALATKNAILIVEVAREQREIHNKSVLEAAVIGAKTRFRPILMT  
SFAFIMGVMPLVFATGAGANSRRSIGIAVSSGMLASTCLAVFVPVYVLLQTWQDKRKAKH

>MexIW\_L\_pneumophila ("MexI")

MKFTDLFIKRPVLSIVVSMILFLGINSIYKMQIRQYPKMENTVITIMTGYPGADAELIAGFITPLESAVASAEGIDYMTSSSQ  
QGLSTITLNIKLNFDPQIAFTDVMSKVQQTLNQLPKESQQPVILKKSSTALMYISLDSKDMTPQQITDYATRVVQPQLQ  
TVDGVAKADILGGQTYSMRIFMNPIMKMAALNVTPADVSAVLASNFLTAAGSTKSEYVAINVTAKTDLNNVEEFERLIVKS  
DKGSIIRLDIAKVELGSQNYDSSVTFNSKKAVFISITPTPTANPLTVINDARKLFPSIVREFPPSLTGTVYDATAFIRASIHEV  
METIIEAAVIVIIFLFLGSVRSVLIPVVTIPLSLVGVCCTMLILGYSINLLTLLAFVLAIGLVDDAIVVENVHRHLEEGKTPFE  
SAIGAREIATPVIAMTITLAAVYAPIGFMSGLTGALFKEFAFTLASAVIISGVIALTLSPMMCSKILSEETSGKFAIFLDEFFNK  
LKRYYQNALHSLDDTREMMLLLAGVVILMLPYLYSNTAAETAPDEDQGFFFMATAPQYATLDYIEAYTKPFDIAYKSPFET  
ENYFTVNMSQPISGMVLKPWDQRKKSQFALKQPLQNKLSKIAGLNAFAIVPPPLPGGGGPAVQFVVKTNDQFQSLMD  
VSNKLTEKARNSGLFIYIDNSLKFNQPPQVEFSINRAKASEMGLDMRALGSSLTALSNGYINYNLEGRSYQVIPQLARKFR  
LTIEQLGQIYVKTNGTMVPLSTVITPTEKTQPNAAHFQQLNSATIQAVMMPGKTLGQGLEFLQAAQEVLPKGFTYDY  
GGESRQFMQEGSALIFAFVIFLVLAQYESFRDPLVLSVPMISGALIPNLGVATINIYTQVGLITLIGLISKHGILIVD  
FANHLQREKNLDKRAAVEESAGIRLRPILMTTAAMVFGVIPLIASGAGAASRFDIGLVISTGLLIGTCFTLFVVPTLYTYLAE  
DHRHKPNEPAEIQ

>MexFQ\_N\_oceani

MNFARFFTDHPVFASVLSILIIIGSLAILTLPIERHPQIAPPTVVVSTTYPGASGETVAKTVATPLEQEINGVEDMLYMSSQAT  
NDGALRLTITFELGTDLDKAQVLVQNRVALAEPRLPEEVRMRGMSVRKSSPDLVLVNIISPDQRYDQIYLSNYALIHVREAL  
ARLPGVGDIALFGGRDYSMRVWLDPESLASRELTAMDVVRAIREQNVQVAAGTLGEPPIPGSTDLQTLVNTMGRLTEAE  
QFGKIIVKTGTEGQVTVYVRDIARIELGAASYASNLYLGSQPTVGIIIFQRPGSNALETKQAVMETMERLAKDFPPGIAYRVVY  
DTTTFIEESVKSVVKVLFEAVLIVLVVVLVFLQNW RATLIPMLAVPVSLIGTFAVLAALGFSLNTLTLAAMVLAIGIVDDAIV  
VVENVERNLEAGLPRREATLKAMGEVSGAIIAMALVLGAVFIPTAFISGVTGQFYQQFALTIAAATIISAINSLTLSPALSAIFL  
KSPDEKKDFLQRWLDRLFGWFFKGFNWVFGWFWTKYLLIRRLVRMSVLMGLIYGGLGLTYLGFTQVPTGFIPQEDQGY  
LIVFAQLPDAASLERTDAVLRANEIILDTKGILSTNAVAGWSVIMRGNQPNVGTIFVILDPFSERTEENLGANAIAETLQQR  
LGEIQEAFIGVFPFPPSVRGIGNLGGFKMEIQDQGGRLHALQDAVEQVIITGNQTPELSGLFTFRANVPQIYLDIDRTQAR  
SMGVPLSNVFDTLQVYLGSLYVNDNFNLGRTFRVVAQADGAFRDQPEDIYLLKTRNVSGEMVPLGALVDIQETTGPDKV  
NRYNLFPAAEVNGDAMPGISSGQAISLMEIAERELPRGFGFEWTELTYQQILAGNTAVYIFPLCVLFLVFLVLAQYESWSL  
PLAVILVPMCLLSAIMGIWFMGMDNNIFTQIGFIVLIGLASKNAILIVEFAKQLQDKQLNRYKAAVESSRLRLRPILMTSFA  
FVFGVLPLVIAEGAGAESRELLGVAVLSGMLGVTFGLVFTPIFYVVVVRTFVERRQVRVRAEMPKPVHKEGDIEPLTPGNSD

>MexFQ2\_N\_oceani

MFSAFFIDRPKFALVISLVMLLVGGIALSLIPVAEFPEITPPQVTVSASYPGANAEGVEQSVAVPIEEQVNGVEGMSYMSSTS  
SSDGSYQLNITFEVGTADIAAVNVQNRVAVANTQLPQEVIRQGLTTRKQSPNMLLIVNLISPKGSRDSLFLSNYASIYQLQ

NPLARISGVGDVSQFGVQDYGMRVWLDPDRLTALGLTASDVVKAIEEQNIQASAGSLGAPPFTKAPQFQYTLQAKGRLA  
TVEEFEDIIVRASADGSLVQLKDIARLELGSQSYNAISKLNSQPAASIVVYQSPGANALQVANQIYAELERLAQSFPDMEY  
HILYDTTQAVRASVQEVIKTLLITFVLVAVTFLFLADWRSTLIPVCAIPVSLVGAFAMAAMVVLGFSANIITLFAMILAIGIVVDD  
SIVVVENVQIRIMRENALEAREATRRAMAEITGPVIATTLLAVFVVPVSFMPGITGQLYQQFAVTISVAVAISSLNALTSPA  
LCRLLKPDSSGQTHGLLRAFAWLNRNRNGYVRVCSMLRHLRISLLVLTFFVIVTVFLFQRAPSGFLPTEDKGVLMVNVQL  
PDGASLARTEAVIDEITQMTRDTAGITDVISVTGFSILGGAASNAGLVIPIAPWDERSSPQLQWEPILGHLNASLASIAAAE  
AFAFPPPPITGLGTGGGIEAQLQDLGGGSPQELAAAMGSLVFAANQHPALMGVFSTYSASAPQLYLDIDRERAKVLGVSI  
ADVFTTLSANLSSLYVNDFNLFKGKSYRVMVQAEAEYRNAIKDIGNLYVRSGPGEMVPLRALIDVEPVLGPLSITRYNQFKS  
AAITGNPAPGYSSGEAIAALEQVAAEALPEGYRIEWTGTSKEELAAGALVIYIFALAIVFAYLFLVAQYESWTLPLGVISSVVF  
ALFGALLPVVMLPFLDNNLYAQIGIVMLIGLASKSAILIVEFAKERREQGLSTHEAALTAARLRFRAVLMTALSFILGVSPLLF  
ASGAGAASRTSVGFVFGGMLAATVIGIFFIPVLHVLYQDIRLSVPRVWQRPTLRPAKLVPKETEQSDDEQG

>MexIW\_N\_oceani

MKFTDLFVRRPVLASVSVLLILLIGMRSLTLEVRQYPETENTVTVSTAYPGASSELINGFITPLQQAIAEAEGIDYLVATST  
QGHSIIEAHMLVNYDSNAAVAIEQAKVASQRNVLPPEAENPIDSTTGSTALMYMAFYSEAMSPAQITDYLLRVVRPKL  
QAVPGVSKAQLIGNKTFAMRIWLDPRRMAALGVTANDVREVLENNYLASVGHTKGAYVAVDLSATTDISREEDFLNLV  
VREADGALVRLRDVAEPQLGAEDYDSSNWYNGKPAIFIGIEQAPGANPLDIAGHLHDLMPERRQLPSGVDGYIVYDASA  
YIEDAIREVFRTLAEAVLVVLVIFLFLGSLRAALVPAIAVPLSLIGGAFLMLVLGFSNLTLTLLAMVLAIGLVDDAIIIVENIH  
RHLEHGESRFQAAIHGARELGLPIIAMTTTLVAVYAPIGFMGGVLGTLTFEFAFTLASAVLVSGVVALTSPMLSSKMLRPVS  
EAGRFEQWVERFFTRLAGYYLRLRYALESPLVVIVFAGAILCSIYFMYVTSQNELAPTEDQSILFFQATAPQTATIDYDEAYS  
RQIIDIFESFPEYHESFLLLQGGGDPSTVFGGFKMPVPSQRERSQMEIQPEMQQKLQGIAGFQIAVFPRPSLPSSGGGLPL  
QFVITSAADFSRLDQIAEELIRQSMASGKFAFLQKSVKFSRPKTKLKNRDLGDLGIRMKDIGQNLGIMLGGGYINWFNLE  
GRSYKVIPQVDRRYRLDQEMLENYYIRTGAGELIPLATLISFEETVEPSKRVQFQQLNSLTVQGVMAPGVAVGEALAYLED  
KAREIFPSAFSWDYAGESRQYTQQGSALMVTFFSLLVIYLVLAQFESWRDPVILMSVPMSIAGALVFLTLGFATVNIYT  
QVGLITLIGLIAKNGILIVEFANQLQLQEGLDKQAAVEKASSIRLRPILMTTVSMIVAMVPLLMASGPGAVSRFDIGLVVASG  
LGIGTLFTLVVPAVYLLVAGDHREEKEAVQEPMEQESGKA

>MexDYB\_H\_chejuensis

MRDSIQGDALSQRRLAFFVNRPVFSWVAIVVMLAGALGLMSMPVSQYPDIAPPTIMISASYPGASAEVVENSVTQILE  
QELKGLDNLMYFSSRSSSGASEVMLTFQHGTADADIAQVQVQNKAQAAGRLPAPVQQQGLTVNKSQNNFLMILGFY  
DASDRLSDTDISDWLAGSLQDPLSRVDGAVQNFQSPYAMRIWLDPHKLNSFRLMPKDVTDIAAAQNTEVSVGELGA  
LPARPQQQLNVTVTSMRSLTSPQQFRDIIKTDADGAVVRLGDVARVELGAEDYGGTTKLNHGPASGLAVMLAPGANAL  
QVAEAVKQKVAQLRGVFPFGVKVAFPEDTTRFVKLSIHSVLQTLLEAVALVVLVMFAFLQNWRATLIPAITVPVLLGTFG  
VLAAAGYSVNTLSLFAMVLAIGLLVDDAIVVENVERIMREEGLDARAATLKSMDRITGVLIGVAAAALAAVFLPMAFFSGS  
VGVIYRQFSVTLVAAMALSAAICLTPALCVKFLRHGEASAGGFNAFNRGFARFQQRYVGGLRFMLSRPVRFSAAAYILA  
VGLMALVYWRLPATAFIPDEDQGTVLVQFNLPAGATYDRAAKVAQEIERYFLEQEKANVETVYILSGFSFDGAGQNAGMG  
FVALKDWSQREGPENSAQAIADRATEAFSRLRDAQAYSMVLPPIEGLGRSNGFELWLQDLGGLGTEGLAAAAAEEQRL  
QGGEAFSYVRAGADRNQQLRVQDIDREKASALGLEADVNETLSVAWGGSYVNDVHQRVKKVIVQADAPYRAAPE  
DLRHWVVRGAGDAMTPFTAFSATQWRNGPTELSRYNGLQAVPLFGAAAQGVSSGEAMAQVEKQAASLPGTNFEWSG  
LSYQDKLSSGQAPLLYLASILFVFLCLAALYESWTIPCAVAPAIPGLVGLALLAVYWRGLPNDIYFQVGLTTIGLSAKNAILIV  
EFAEAAVRQGMAMPMTAVVEGARLRLRPILMTSLAFGAGVAPLALSTGPGSASQNAIGTSVLGGVLAATALAIFVPLFYL  
VWKGVFFTGRRRAFATVKKSGAVA

>MexFQ\_H\_chejuensis

MNLSQYFIHRPILAGVLSIMIFIAGALAVFELPITEYPEVVPPTVVVNATYPGANPKVIAETVASPLEQEINGVENMLYMSSQ  
ASSDGRMALTVTFALGTDLDEAQVDVQNRVSRALPRLPNEVQRLGVTTTEKSSPDLTMVVHMOVSPDNRYDTLYLANYAT  
LNVKDALSRIEGVGAVRVFGAGDYSRLWLDPEKVAALNLTSDVLHAIREQNRVAAGTLAAPPSPSASDFQLLINVKGR

LESTEEFENIIVRVGPNGEMTRLKDVGRVELGSSTYALRSLNKNPAAALPIFQRPGSNAIEISDNVRATMAELKKTFFPEGVD  
YSIVYDPTVFVKSGSIKAVVQTLLEAILLVIVVVLFLQTRASIIPLVAVPVSLVGTFAVMYLFGFSNLNLSLFGVLVAIGIVVD  
DAIVVVENVERNIELGMTPEATKQAMKEVTGPIIATSLVLSAVFIPTAFISGLTGQFYKQFALTIAISTIISTINSLTSPALS  
LLKPHSAKKDLSRIIDGLFGRWLFAPFNKFFAKASNAYTWGVKRIIRGGLVILVVYGGGLIGLTYHQFQATPVGFVPQQDKQ  
YLVSFAQLPDAASLDRTEDVIREMSAIALKHPGVESAVAFPGLSVNGFVNAPNSGIVFVTLKPFEERKDPSSLASAGAIAGQLN  
GEYSAIKEAFVAIFPPPPVMGLGTIGGFRLQVEDRASMGYNELYAQTQNIQKAWATPGLTGLFSSFQVNVNPQIDVDVDR  
EKAKSHNVSLNDVFETMQVYMGSLYVNDYNQFGRTYQVNVQAEDDFRQEADQISRLKVRNGQGDMPIGFSFVNVTHT  
AGPDRVMHYNGYPTAEINGAPAPGYSSGQAQAAIEKLLNDELPMGMTFEWTELTYQQILAGNTAVFVPLVLLVFLVL  
AAQYESWSLPLAILIVPMTLLSAMTGVLSSGGDNNIFTQIGLIVLVGLATKNAILIVEFAKERQDAGLSLMDAILEACRLRLRP  
ILMTSLAFIMGVAPLVYSSGAGAEMRHAMGVAVFSGMIGVTIFGLLLTPLFYHLIRRWWVKRDPQDEAQGEAAHA

>MexIW\_H\_chejuensis

MKAFTDIFVRRPVLLVNVNIIAGVQAWNSLSVRQYPQSENASVTVATTYVGASADVVRGFVTTAIERAIASADGVDYIE  
SKSMLGLSLVTARLKLNDPTKALADITAKVNQVRNELPAGSELPAISVQSADSEFAAAYSFWSESLSQSEITDYLVRVVQ  
PRLAALSQVQADIFGARTFAMRIWLKPDHMAALNISPTQVRDALAVNNYLAPVGSTKGSFVQTYLTANTDLHTVEQFQ  
ELVIRQENDTIIRLQDIADVELGAEEDTEVSFNGQTAVFMGIFPLPSANTIEVVERVRKDLEAIKEDLPPGLQGGIGYDASEY  
INNAIHEVVGTLTDTLLIVVVVIFLFLGSFRSVLPVIAIPVSLIGAIFLMQMFGFTLNLLTLLAIVLSVGLVVDDAIVVVENVER  
HLREGRSPVEAARIGARELIGPVIAMTITLAAYTPIGLQGGLTGALFREFALTLAGAVTISGIVALTSPMMSAKLLRSAESEE  
KGFTGWVNRHFRDLRDGYGKVLKVLRRAPAVYTIWAGLSLMVIPMYMFSPKELAPLEDQGFMFGIINNAANASADQK  
AHFGHAAEQIFLNAPERDLTFQILLSPSDPFAAALGVGGFSGMVVWPWNQRDRSIAEIVMDMQNLNAIPGLQVFAAQ  
PPALPGGSNFPVEFVIASTAEPEQMLQFAQQQLQMKAMESGLFYFPPDIDLKYDQPQSEVIDHRKVAALGLNNAQIGAD  
LSAALGGNYVNRNMDGRAYKVIPQVSRVERLNPDLKDIYVSGPEGQLMPLSAVATITDSTVPRSLNRFQQLNAVKLS  
GMTAQLDEGLKALEKAAEILPPGYTINYTGESRQLRTEGGKFLPALGLAILMIFLVLSVQFNSFRDPFVILLGSAPLAMFGAL  
LFTTLKMPDPNMPYWTNGWTTTMMNIYAQVGLVTLVGLISKNLILVEFANKLQMQGMDKLNVAHQAMTRLRPLVMT  
SVATVAGHFPLTLVEGPGAAARNSIGLVLVGGMAIGTLFTLVTPALYVLLARQHKDDPVAEEIESGHAQPAPG

>MexIW2\_H\_chejuensis

MRFTDIFIRRPVLAASVSLIILLGLNALKTLQVRQYPQLENVINISTAYPGASSELVSGFITSPIQQAVASAEGIDYLTSSSN  
QGSSLVEVHLKLGFDSSSTAMTEILSKVAEARRQLPSDAEEPVIQKSTTGSTALMYVSFFSRDMSEAQITDYLRVVPQPLET  
ADGVAKAEILGGKTFAMRVWLNPPQKLAADFLLTPQDVARAVGSNSFLSAGATKGQYITANITADTLHSVQEFQQLVV  
KRDDATLVRQLQDVATIELDAESDDSAVYFNGNRAVFMATSLPAANPLEVIDNIYDLMPALEKQLPSALNVKVAYDATKFI  
RDSINEVIKTVGATVIVFVIFLFLGSFRAVMIPVVTIPLSLIGVCFMMLALGYSINLLTLLAMVLAIGLVDDAIVVVENIHRHI  
DEGLSPFKAIIIGAREIATPVISMTLTLAAVYAPIGFLGGLTGGLFKEFAFALAGAVIISGVIALTLSPMMCSKLMETNSKMAI  
WLDEVFEKLTGAYQRRHLNALNYRPVTLVMVLTMLVSCFFLYQLSNKELARDEDQGIIFSMSTAPVSATHDYVAAYTDEV  
IKTIETFDERNDYFIVQGADGAANSFMFGMILKTWGERERSQMELVPIQQRMGDIAGYQSVSNLPTLPSSGLPVQF  
VITTAQDYKVLVELGQELLDEARKSGKFLVNSDLKFDKPTAHISINRSKAAELGISMQDIGAALATMLSGGYTTFRFSVEGRS  
YKVIPQVLRERATAEQLDDYYVRTASGELIPLSTIAEVSXGVEPNKRGQFQQLNAMVVEGVMTPGISLGEALSFLQKQK  
TIFPQGYGYEYAGQSRQYKQEGSALIFTFFFALLMIYLVLAQFESFRDPFIILVSVPMSSLLGALIPAFGVTSVNIYTQIGLVTLI  
GLITKHGILIVEFANQLQVEQGLSKREAIEQAAGIRLRILMTTAAAMVVEAPLLFASGAGAVSRFDIGLVIASGLSIGTLFTLF  
VPTMYMILGADHSQIEKQEDVDGELSHA

>MexFQ\_A\_ehrlichii

MLRFFIDRPFIASVISIIILVAGLASLRALPIEQYPDVVPPEIVVQAAYPGASSEVLAEAVAAPLEQEINGVDDMIYMESTSTDA  
GTVQISVSFEMGTDPDQAEINVNNRVQAALPRLPQAVRDQGVREARSTNILLVATLSSPDGRHGTLELSNYALLNIIDEL  
ERLPGVGEASLFGQDYAMRIWLRPDKLAQYDLTPAEVAAAIREQNAQFAAGQMGAEPAPDGGQAFTLTVTRGQLEG  
AEFEFAIILRSDESGATLRLGDVARAELGAQSYAFSATYNGEPTVPIGVYQAPGANALETAEQVRAALADSAERFPEGVEYT  
IPYDTTEFVEVSIREVYTTLLIAVGLVVLVTFVFLQHLRATLIPITAIPVSLIGTFAGMQAMGFSVNNLLTFLGLVLAIGIVVDNAII

VMENVERLMREKGLKAREASVETMKQVSGAVVSSTLVLVAVFAPVAFLGGLTGELYRQFAVTIAFSVVISGVVALTLPAM  
CALLLDKQPKTPWLPFRFVNAGFEHLTRAFVAAVGFVLRNRTVGVLGALAVGGAVFLVERMPDGLVPQEDQGFAVVA  
QLPPTSALNRTEAVRDALAAQLTQLEEIQEFTAFAGFDIIAGSLRTNAAVGVFNFTDWADRPRPDQHAAAMSERISGMG  
FGLQEANVFAFIPPIQGLSLTGGVEGFLQVREDMSARQVEALANRVVQRANERPELVNARSTLDTGIPRYRAELDREKAK  
AAGVRIDEVFNTMRATFGALYVNDFTFAGRLWQVNLQSEQDFRSHPEDLRHVFRSESGDLVPLSALVRLTRESGADIIN  
RFNIYQAAKLMADPAPGYTSGDAKAALEAVVAEVRDEEGADALLGWIGEAYQLEVAAGAGAAAFAMGLLMVFLILAAQ  
YERWTLPLAVATAVPFAVLGAALFALLRGFPNDIYFQVGLLVLIGLAAKNAILIVEFAAQNRATGMTSTEAMAAAARQFR  
AIMMTALTFIIGTLPVLFATGAGAASRQEIGTVVVGGMMLAASTLALLFVPLFYKLLEDVATWRNERRARREQEAAQADDK  
EAGNHA

>MexFQ\_C\_psychrerythraea

MFSRYFIDRPIFAFVISIFVLAGLAAMRSLIAQYPEMSPPVQVTAVYPGASAEVLEQTVATPLENAITGVEGMMYMSST  
STSAGATTITVTFEIGTDPDQASVNVNNRVKQVEARLPEETRRQGVVAKGSSSFLHVHAFYSPDDREALWTSNYVTLN  
IIDKIKRIPGTTSVQIFGAKDYAMRIWLRPDVMSQLGVTVEISSAVREQNSQYAAGRIGATPTSVSPQSLVYSVKVQGRLS  
TAKEFEDIIIRANNDGSSLRLKDIARVELGSKDYDFDGRINGKKAVLLGIFLQPGANALDVADEVNATIAELETRFPTGLEHLL  
PYDTTRFVKVSIREVLKTLGEAMLLVFLVVFILQNW RATLIPIMAVPVSLLGTFAGLYMLGYSINTLTLFGMVLSIGIVDDAI  
VVLENVERIMHEEDVSVRDAAIKAMKEVSGPVVAIVLVCSEVFPVIAFLGGLTGELFRQFAITISISVLSGLVALTMTPALCV  
LVLKHEDKKTNFFNGFNRRFFNKVTGHYVTGVSFLLRRGLLALMLVLGMVVITANMWLKTSSLPDDEDQGFYISAVFLPD  
GASLQRTKKVDEVIAAIESNPANENVISFTGFDFLGGGYKNNAAATIFVTQKHWDDREISTQQLVGELFMKTANINEALVL  
AFNPAPGLGNTGGFEFYLQNRGDGGVAKLKQSMQAMMGAAQQSPILAGVQTLWRSDSPQLTVEIDREQARAMDIP  
INNAFNALAGTMGTYYLNDFNKFGRTWQVLMASAEPEFRMSPKDISRIYVKSNGGEMVPISAFAEINYSSGPDSLDRYNNL  
SAVKLLGSAAPGYSSGQAI AEIERIANEVLPSDMSYEWGTAYQEKRSSGSTAIALGMVIMVFLILAALYERWSLPLSVLLA  
LPFGIFGALVSVWIAGMTSDVYFQIGLVTLGLASKNAILIVEYALMKKQEGWTTGAAALEAARLRFRPIIMTSLAFILGVVPL  
ALSSGAGAGARHSVGTGVMGGMIAATFLAIFVPLFFYWLTERKISENRKQQAITDEIAQHHEHELNSK

>MexFQ2\_C\_psychrerythraea

MISKTFINRPKFAFVISIVITLAGLIAMSVLPVNMYPEITPPQVQISAVYPGASAQIVEESVIRPIEEQINGVEDMMYIESSASN  
NGSAVITVFFKVGTDGDIAQVNVQNRVALATSSLPSEVTRQGV DVKKKSSSMILLGINLFSEQEGINQLFLSNYATNYLTET  
LGRIKGVASAEVMGEMTYSMRAWLNPERMSSLSITVTEVQQALQE QNMIVAAGKLGASPTLPNQQFEYSIQAKGRLOT  
PEEFGQTIIRAQRNGNFIRLNDIARLELGAEDYSTQARLNGKET AFLVIYQLPDANATEVASLVKAEMAELSQRFPDGLKYV  
IPYDTTKFIDRSIEEVVTLFQAIVLVILVFLQLQNW RATIIPVSLIGTF AFMVLMGYSINTVTLFGLVLAIGIVDDAIIM  
ENVERILKEEQ LPIKEAVTKAMDQVSGPIIATTLVLLAVFVPVAFMPGITGELYKQFSVTISFAVLISSLNALTLPALCTVLLSA  
EKMKPITWLLPFERLITKATGGYTKTVGFMLKRLTRVGLFVGLIFIGAGWLTTAVPTAFLPAEDQGYLFVDIQLPDAASSNRT  
QAVLDKITPTILNDAAVEDIITVSGFSLLGGAGSNNGLA IILLKDWEERTTPELGLKQIIPRLMGQLWTMPDAQIMVFNPPI  
PGLGNSSGDFDKLQDSEGRDPAELAQVMNGLIYEANQRPELSRVFSTYRANVPQYFLEVDRNKAKAQGVALSDIFATLQ  
AQLGSLYINDFSQFGRTRYRVTIQAESQYRAEPSDLRYFYVRNKDDEMVLTTLASVKPILGPTTISHFNLYRSASITGNASPG  
YSSGQSIDVMEELASTLPQGYIYEWGQSKQELEAGNLAPILFGLAIIFVYFLVAQYESWTIPFSVIAAVPLALFGAMLALYT  
VGMANNIYAQVGLVLLIGLSTKTAILIVEFAMEQRAAGETIMNAALNAAKMRFR AVLMTAFS FILGVLPLVFATGAGAGSR  
VSLGITVLAGMIAATLFGTLLVPYFYLLIQRMREKIKGKPDVT

>AcrB\_C\_psychrerythraea

MQESKPSVMDIFVRRPVVAIVLSIIIC IAGIWSASKIPVLQFPKIDSASLVIETYYIGASADVVKGFITEPIERAAATVPGVEYVD  
STSTSGSSKVTAWLKLNNENSTLALAE L TARLGQIRFELPQGAQDPVVSVRADRPFAVFYLVNQANGNDLSRITDYLTRQ  
VNPVLNAIEGVQRVGIEGARTPAMRVWLNAQALQIFNLSASDVYQALATNNTIATMGYVENS RQKIDIVANTQLSSVEE  
FQQLVISEVDGATHLKDVAKIELAAEDTSVTARLNDKDAVYISIWPLPGANEIAIGDRLYEKVDELNKTLP HGISIDYAYDG  
TLYMRDALKEIFTTLAETVILVGLVVLLMGFSRSAIVPLITIPISILGAIAAMGIMGFSLNLLTVLAIVLSVGLVDDAIVVVEN  
VARLMRQGLSKFDAALISSRQLLVPIISMTLTLAAVYAPIGFLSGLTGVLKFAFTLAI AVIISGIVAITLSPIMSAYVSPKG GEE

SWLTTKVNHLFERLQRRYGQLLTHIFKWQGQVFLIALVVSLLTVPFYLYSKKELAPIEDQATVMFVIQSPPDASMAYNVAQ  
MNPVVESLQEIEGGKKIWQIIFGGGGFGGLELVNADKRDYSAQSLVPQIYGKLSQIPGLNMFILPSSLPSSGQFEIEMIVKA  
TAPYSEMKQYADQLVGAASFSSGKFLFADTDLKIDLPQVELQLNREKIADLGMNVGEVSEQLGILLSSNFVNRFDANGKAY  
RVPIVNDDEVRSKTEAILSLDIKPTGELLPVSAVADLKWKTVPRLGTFAQQASFRIYGGVAPGSNKEAALSAIEDAAKEILP  
LGYSIDYAGESRQLRKEGNTLVMVLGISLLVFLVLSIQFNSFRDPLVLLGCVPLALSGALLIPYIELTTINIYSQIGLITLIGLIAK  
NGILIVEFANHAQELGANKLAAVTEAATTRLRPILMTTAATILGHFPLVLVTGAGAEARNSIGIILVAGMFIGTIFTFILPSFYL  
LLAEKRDKLMLDEIQVSDEALQKVHS

>MexDyB\_K\_koreensis

MAQFFINRPIFAWVISLLILLGGTLAVQNLPIMAYDISPPQVTINATYPGASAKVIEDTVTSVIEEEMNGIEGLRYIKSESSRT  
GTSTIILTFATGTDTDIAGVEVQNRLKRVEARLPSSVRTQGVNIDKTRPDFLMVVSLSYPNGSHDATDLGDYIDRAILGEMR  
RIDGIGSAQLFSATYAMRIWVDPKKMASFAITADEIAQAIRNQNAQLATGELGSLPAPDKQQINATILVPSRLNTPEQFGD  
IILRSSSEGAIVRLKDVAMVERGANSYTAQAFNLNGQESAFAALKLSNTGNALAEAAEAVKAKMAELEQYFPDDMSWVVPY  
DTSIFIDESIGQVLQTLIEAVFLVTLVMFLFLQSWRTTIPLIVVPVSLIGTMGLYLLGYSINMLTMFAMVLAIGIVDDAIIV  
ENIKRIIDQEKLPYQATKKAMKQISGAIGTTAVLIAVFIPMAFFSGSVGRIYQQFSLTIVLSVSISAFSLSLSPAIAQGFLKTE  
TKEKKEWAFFRWFNQGFNWFETETYSQEEKLFNKRQGLITMAIFVVICGLVGWRFASMPGTGFVPSSEDQGFIVSSSLMPS  
GSTRSRTLTLTQKTDWFLQPEVERIITVAGFSFFGTGQNTSITFVNLKSWAEREGMRNADQFAAAATAEFMKYSEGSTF  
AFNMPPIPGLGNSSGDFDQLDKSGVGTDLQMGAAFLVGMASQSGKFAEIRPDTLPPAPLLTIEVDRIKARSLGVDIGEL  
NSTLQIALGSAYINDYVEGQKVRQVWLQSDAETRSTPDEILTMQVRNDQGDVLNLSEVAKAQWTEAPAKLTRYNGSPS  
LPITGSGSPGVSSGEVLALMEEFAQTLPKGLGYEWGQSLEEKVAGNQTTLLFSLSLVFLVLAALYESWSVPLSVILVAPLG  
ILGSIIAFIGGLPNDIYFKVLITIGLSAKNAILIVEFAREAEGEGKSPLEAVTEACRLRLRPILMTSLAFVMGVLPLVLATGAG  
SASRQAIGTSVVGGMISAILAIIFVPVYLLVRKIFPRKLKHYEMAARGMEINDD

>MexDyB\_D\_nodosus

MAKFFINRPIFAWVVAIFIMIAGLFSATRLPIEQYPSISAPTINISFAYLGASAQTIQDSVISIIEEQMNAIEGIDYMESKAYSNG  
HGAIITITFHSGIDADLAQVNVQNKLSQVESRLPQSVRNMGIMISQASDNFLLLTALYAEDNARQDIGEISDYAVQVIKPEL  
QRVSGVGEVQIFGSERAMRIWVDPQKLKSYNLSFADVQQAISQNIQITAGTLGDTPNVLGQQYSASIHQGLLGSVVEEF  
EKIVIKYDFNGATVKLKDVAVVELGKQTYAFNTRLNGKPAIGIGVRLSSTGNAAAAKEIRTKMESLSHYFPEGVSWDIPYD  
TSTFIKISLGKVLHTLAEAILLVFIMYFLQNIIRYTIPTIVVPISLLGALALMYPMGLSINVLTMFAMVLVIGIVDDAIIVVEN  
VERLIVTEQLTPYQAAQKSMQKITNAVIGITLVLSVFIPMAFLSGATGAIYRQFSLVMAASIGFSAFLALSLTPALCATILKPA  
RHHANKTGFFAGFNRIKITRLYQETVGRILRLSYAMMAVFGLVLVSVFIFTRIPTSFLPVEDQGTVITTYQLPAGATLERTK  
HMEKAEDIVLNNKDLVKSMTTVIGFSFGGQGNMAFSFISLNDWSQRRGKGQDSISFTRRLNGMLQSINEAFALTTPPA  
IPSLGVSSGSFLYLQDRNNQGHEALLAARNQLIGMARQSKILTSVRPSGLEDATQLQIDIDRNAFAAQKVPLTSIAHTLGN  
ALGSNYLNDFPNKGRMQRVYVMAQANARMQPEDVLNLTVANLRGELVPISSLANVKWIKGSEQVTRYNGYTAMAVE  
GAAVPGHSTGEAMAEISRLAAQLPDGFAVEWTGQSLEIRSGHSEYYIYAFSALAVFLCLAALYESWSIPFAVLLVPLGIFG  
VTMGNNFRGYENDIYFKIGMITVMGLSAKNAILIEFAKELQDDGMSKVRAMSAALRFRPIIMTSLAFIAGVVPLYFASG  
ASSSSQRAIGTSVLWGMLIGTILSIFVPIYYVWIRKIFSGKKRNTDAESSLTHQQG

>MexIW\_T\_sulfidiphilus

MRFTDVFIKKPVLATVVSLFILLGIRAGFDLNVQRQFPEIKNAVTVTTAYIGADADLIQGFITTPIEREIAAAEGIDYIVSTSVA  
GVSLVQANLRDLDYPNEALTQIAAQVNKVRSDLPEAEPEVIELSVGQTIAAMYMSFYSELLSNNQITDYLVRVWQPQLST  
IPGVQRAQILGDRTFAMRIWLDPERMAALNVTGADVAAALRANNVLSAVGRTKGEMVSIDLKASTDLSSAEFEQLVVR  
AEEGAIVRIVDIAEVELGSENYDVSVSFNGQSATFIGIEVAPDANALDVIAEVRRVWAEQIEPQFPQGLSGDIVYDSTLYIQS  
AIDEVLLTIFLALVIVVGVIYFLGSGVRSVIIPALAVPLSLVGTFLMLLMGFSINLLTLLAMVLAIGIVDDAIIMVENIHRHIEEG  
MAPLEAAMRGARELAWPIVAMSTTLVAVFLPIGVFGGITGTLFIEFAFTLAASVVISGIVALTLSPMLSSRLLKAHGEKSGKRL  
EAWLDARFDGLRRRYQRRHLGALDDKHVLSFGLVLVSCYFLFITSPSELEPAEDQGFVFSIAEADAPTTLDHLENTAVM  
NRYLDEIPEMRNIFIVNGFGGAGVGATNTAIAAGFVLAPWDQRRERSTQQVLEQDLQPRIEQIPGLNIFALVPPSLPGGGGG



PPVEFVIRSTEPAENLQAVAQEVVGRAMQSGRFIDGDLKIDKPRTEIHIDRDRAALMGVDMQSLSadLSALFSGGPAGR  
FSLDNRSYRVIPQLERVQRLNPEQIEDLYTRNREGELVPLATLITLEDTVQPQQLKRFQQLNSVTLSGVPRPGVTLGEALDL  
LDGIAAEVLPPGYSVDYAGQSRQFKSEGAQLILTFFFALVVIYLVLAQFESFRDSLIMMMTVPMSIAGALIFVSLGFATLNI  
YTQVGLVTLIGLIAKHGILIVEFANKLREEGLSKREAVEEAAAIRLRPILMTTAATVLAMIPLLIAAGPGAGARFAMGLVIASG  
MTIGTLFTLFVVPAMYVYLSRDRAVQTAADAEAVRV

>MexIW\_S\_degradans

MKSITDIFVRKPVLAIVVNIIIAGLQAVSSLTVRQYPRNDNAVITINTAYIGADAELVRGFITSPIERAVSGADGIDYVSSSSS  
QGVSSSVSRLELNYPIDKALAEITSKVNQVRGDLPEAEVPVINVESADSQFAAAYLSFSSDILADNQITDYLVRVVQPRLS  
ALEGIQRADVLGARTFAMRIWLQPDMAAHNISPTQVRQALQANNYLAALGSTKGQYIQVNSANTDLNSVDEFKELV  
LRSENGAIIRLKDVAEVLGSESYDMEVRYSGKTATFMGIFPQPNANSLDVMALVREEMKNMQAALPKGLDAVIAYDAT  
AYIESSISEVISTLIETLLIVVVVIFLFLGSIRSIVIIPVVAIPLSLIGAVFVMQIFGFSNLTLTLLAIVLSVGIVVDDAIVMVENVERHIS  
EGQTPFKAAAILGARELVGPVIAMTTTTLVAVYLPIGLQGGTLGSLFKEFAFTLAGAVTISGIVAITLSPMMASKMLKEGMEDEG  
FASTVARIFDRVKNRYTRMLDHTLEHRFPVYVWVATAILGVVFYMQSPKELAPTEDQGVIFGIVEGSASSTMDQASIFA  
AAANDAFSSFEETDFTFQLTFPNSGFGGMVLKPWDERERTVFDVLPEAGGKLSQIPGINLFPITPPALPGGGNMPVEFVIA  
STAEPEQILKFAQELQKQATMSGQFAFPPMIDTQIDLPAELIIDRDKVADMGLNMQQVGADVGTMLGGGYVNRFNIA  
GRSYRVIPQVERIERLNPEQLGNIYVTGPEGKLVPLSTLARVERKTVARSLNRFQQLNAVKLSGVAIGPLDNALKVLEEEAA  
KILPQGYMIDYTGESRQLRREGNKLLPAMMMASLLIFLVLAQFNSFRDPLIVLGGSVPLAWFGALIFTFLKMPNPNMHF  
WTDGWTTTTNIYSQIGLVTLIGLVAKNGILVVEFANKMQEQGLTKLAAIKESAGTRLRPVLMTTVATVAGHFPLVLVTGAG  
AEARNSIGLILVGGMAIGTFFTLFVIPSIMLIAKDHGRGEKFHVSEFELEDELEEESKTTA

>AcrB\_D\_dadantii

MAKFFIDRPIFAWVIAIMVMLTGTAILKLPIAQYPTIAPPAVQITANYPGADAKTLQDVTVTQVIEQNMNGIDKLLYMSSNS  
DSSGTQVITLTFDADANPDIAQVQVQNKQLQAMP LLPQEVQQQGVSVQKSSSSFLMVLGFISDDNNMTQQDIADDFVG  
ASIKDPISRVRGVGD TQLFGAQYAMRIWLD PDKLN NYQLTSDVVSIAIQVQNNQIAAGQLGGTPPVPGQKLNASIIAQT  
RLNSPEQFGNILLKVNQDGSQVRLNNVARIELGGESYSVIARYNGRPAAGLGIK LATGANALD TASAVKAEITKLQSTFPA  
GLKVVPYDTPPFVKISIEVVKTLLEAIVLVFVVMYLF LQNFRATLIPTIAPVVLGTF SILSAFGYSINTLTMFAMVLAIGLLV  
DDAIVVVENVERVMAEEGLSPKEATR KSMGQIQGALVGIALVLSAVFIPMAFSGGSTGAIYRQFSVTIVSSMVLSVLVALIL  
TPALCATILKPITNHGEKKGFFGWFNRLFDKSTHHTNSVANILRSTGRYVVVYLIVVAGLGLMFTRLPSSFLPQEDQGVLL  
TMVQLPVGATQESTQKVLDDQVNDYYLQHEKENVKSVFTVNGFGFAGRGQNMGIAFASLKDWDERSGAANKVDAIIGR  
AFGAFSQIKEALVIPFNIPAIVELGTASGDFELIDQNNLGHDKLMAARNQLLG MIAQH PDLTVRVRP NGMEDMPQYRLE  
IDQEKAESLGVSIATINATLSTALGGTYVNDFIDRGRVKVYVQAEAKFRMLPNDIQK WYVRGTSGQMVPFSAFASERWE  
YGSPLRERYNGLPAVELVGEAAPGKSTGEAMALMEELAAQLPPGIGFDWTGMSYQERLAGNQAPALIISIAIVVFLCLAAL  
YESWSIPFSVMLVPLGVFGAVMAAGLRGLENDVYFKVGLLTTIGLSAKNAILIVEFAKDLMEKEGKGLVEATLDAVRMRL  
RPILMTSLAFILGVVPLVISTGAGSGAQNAVGTGVMGGMITATVLAIVFPVFFVVRRRFGKKKEADDSHNEHTQTSH

>MexDYB\_D\_dadantii

MFSRFFIHRPVFAWVIAIVIMLAGALSIESLPVAQYPNVAPPSVAIKASYPGASADTLENSVTQVIEQQLTGLDGLLYFSSSS  
DSSGDVRITATFTQGTNPDTAQVQVQNKVQQATSRLPTEVQQGQITVTKSQQDFLLIMALYD TTDKSTAADIADY MVS  
NLQDPLSRVEGVGSVQVFGSQYAMRIWMDPTKLAAYSLMPSDISSAVETQNTQVSAGKIGAQPASSDQQLTATVTAQS  
RLKTPAQFRDIIVKSESSGALVRLGDVARVELGNEDYTTTTRLNGHPAAGIAVMLSSGANALATAERVKAKVAEFTPQMP  
QGYEVSYPKDSTDFIKVSVEEVVQTLFEAIALVVLV MFLQNL RATLIPAVAVPVVLLGTFGVLAVFGYSINTLT LFGMV LAI  
GLLVDDAIVVVENVERLMRDQGLSPVAATEQSMREISSALVGVALVLSAVFLPMAFFGGSTGVIYRQFSITIVSSMLLSVVV  
ALTLPALCAALLKPAAHTPSNGNGFFARFNRGYENLQORYTGRVAHVITGPWRYLALYGLVIVVMGVFLRLPGGFLPN  
EDQGDVMVQFTLPAGATETRSTKVGRIEHYFLSEEKDNVEAIFVISGFNFSGSGQNAGMAFVALKNWSQRPGSANSST  
AIAHRAHQALSARDAQVFTMSPPAVQGLGQSDGTFELQATGNTDRSRLALRDQLLAEAAKNPRLTAVRPNDLVQM  
PQLQVDLDYAKVRALGLSISDVTSTLSSAWGGTYVNDFIDRGRVKVYIQGDAGSRGQPSDLDKWFVRGTDSSGNSVM

TPFSAFAATRWSYGPESLSRYNGLASYEIQGAGAPGVSSGKAMDEMEALARALPAGTTFAWSELSYQERLASGQAISLYA  
MSILVVFLCLAALYESWSIPFSVMMVIPLGVVGAVLAATLRGLENDVYFQVALLTTIGLSAKNAILIVEFAEAAYRRGATLYE  
AALEGARTRLRPVLMTSLAFIAGVFPLAVATGAGANSRISIGSGIVGGTLTATVLAIFLVPMMFFVLVRRVFPGRHAPTSPSTS  
MPTPTQGEN

>MexDYB2\_D\_dadantii

MPQFFIHRPVFAWVIALFIVLLGTIAIPQLPIARYPSVAPPTVSITASYPGATPQTMNDVAVGLIERELSSVKNLLYFESSVSDTS  
GSAQISITFKPGTDELAQVDVQNRISVEPRLPQTVRQNGLQVESASSGFLLLVSLTSDSGRFDQVALSDYLARNVIEELR  
RVEGVGRVQLFGAEQAMRIWVDPNKLLSYGLTMNDLSTAITQQNAQIAPGRVGDAPTLPGQRVTIPLTVQGQLETPEQ  
FAAIVLRAREDGSRVVLADVARVELGAQSYGFSVRENGKDATAA AVQLAPGANAVRTAAAIQRMALKPSPMAGMG  
YSLPFNTAPFVKISIEQVIRTLAEAMVLVFLVMYLFLQNVRYTLIPAIVAPIALLGTFTVMMAAGFSINVLTMMFGMVLAIGIIVD  
DAIVVVENVERLMAQERLSPKAATTQAMKEITGAIVGITLVLSAVFIPMAFASGSGVGIYRQFTLSMAVSILFSAFLALTLP  
ALCATLLTPVADGHHEKRGFFGGFNRRFEQLTQHAAAGTRALLRRSGSMMLLFAALTGALAWIFRELPSDFLPQEDQGYF  
MTSIQLPSDATEARTRDVVKTYEQHIASRPGIASNMSILGFGSGSGPNAAMAFTTLKDWASARDGATAQGEVALAQQA  
MSSIREGTAMTLMPPAIDELGTSSGFTLRLQDRSGQGYAALKAETKLLTLAAQSHIVAGVYPDGLPPGSTVRLNIDRQKA  
EALGVSFSTLSETLSAAIGSLYVNDFPNAGRMQQVIIQADAPARMQLDDVLRLYVRNTAGGMVSLKEVVTVPVWSDTPLQ  
LTRYQGFLAARISGSAAPGVSSGAAMAEMERLAAQLPPGFTVEWTGQSLQERQSAAQAPMLLLLSMVVVFLVLAALYES  
WSIPLSVMLVVPLGLLGAVLAVILRDMPNDFVFFKVLITVIGLSAKNAILIVEFARQLRDQGHVLDAAVTAARLRLRPILMT  
SLAFALGVVPLMVASGASAETQHAIGTGVFGGMVSATVLAVFFVPVFFVAVMSVQERYDRWREKRRTTHVNAPH

>AcrB\_S\_glossinidius

MSKYFIDRPIFAWVIAIIIMLAGALSILKPIEQYPAIAPPTIRITATYPGADASTLQDSVTQIVEQNMNGIDHLMYMASDSDS  
SGTATITLTFESGADPDIAQVQVQNKQLQAMPLLPQEVQQQGVQVQKSSASFLMVAGFISDDKNMTQEDIADYVGSSL  
KDPISRITNGVGEVQLFGAQYAMRIWLDPNKLNQFQLTPVDVISALEVQNNQIAAGQLGGSPPVKGQQLNTSIIVQTRLK  
TTDEFGKIQLVNPDGSQVRLKDVATIALGGESYDIARINGQPATGLGIKATGANALDTANAVKAELGRLQANFPAGLK  
VVYPYDTPFVKISITEVVKTLVEAILVFLVMYLFLQNFRTLIPTIAVPVLLGTFAILGAFGYTINTLTMFACVLAIGLLVDDA  
IVVVENVERVMAEEGLSPIEATRKSMGQIQGALVGIALVLSAVFVPMAFFGGSTGAIYRQFSITIVSAMILSVIVALVLTALC  
ATLLKPIKKGDHGGKTTGFFGWFNKKFDQSTHHYTD SIGHILNSTGRYLLIYLLIVVGMALLFIRLPTSFLPDEDQGVFLTMTL  
PAGATQERTQHVLDEVTQYYLNNEKDNVRSVFTVNGFGFAGRGQNSGIVFVSLKDWGERSGAENKVPAITARANQAFS  
KIKDGIVLAFNLPAIVELGTATGDFDFELIDENN LGHEQLTAARNQLLGMVAQHPDVLQGVVRPNGLEDTPYEKLDVDHEKA  
EVLGVSLSDINTTIGAALGGSYVNDFIDRGRVKKVYVQGDAPYRMLPQDINN WYVRGSDNQMVPLSAVTTARWQYGS  
PRLERYNGLPSMEIQGEAAPGKSTGEAMALMEQLAGKLPAGIGYDWTGMSYQERLSGNQAPALY AISLIVVFLCLAALYE  
SWSIPFSVMLVVPLGVIGALLAATLRGLNNDVYFQVGLTTIGLSAKNAILIVEFAKDLMEKEGKGLIEATLEAVRMRLRPIL  
MTSLAFILGVLPLAISTGTGSGSQNAVGTGVMGGMVTATLLAIFVFPVFFVVRRRFGKKGHQDELEQGHVPPPPR

>AcrB\_Enterobacter

MPNFFIDRPIFAWVIAIIIMLAGGLAILKLPVAQYPTIAPPAVSITAVYPGADAKTVQDVTQVIEQNMNGIDKLMYMSSNS  
DSTGTVQITLTFESGTDADIAQVQVQNKQLQAMPLLPQEVQQQGVSVKSSSSFLMVGVINTNGTMTQEDISDYVGA  
NMKDAISRTSGVGDVQLFGSQYAMRIWMDPNKLNQFQLTPVDVIAAIIKAQNAQVAAGQLGGTPPVKGQQLNASIIAQ  
TRLTSADEFSKILLKVNQDGSQVRLRDVAKVELGGENYDVIKFNQGPASGLGIKATGANALDTATAIRAELKKMEFFPS  
GLKIVYPYDTPFVKISIEHVVKTLVEAILVFLVMYLFLQNFRTLIPTIAVPVLLGTFAILSIFGFSINTLTMFGMVLAIGLLVD  
DAIVVVENVERVMAEEGLPPKEATRKSMGQIQGALVGIAMVLSAVFIPMAFFGGSTGAIYRQFSITIVSAMALSVLVALILT  
PALCATMLKPIAKGDHGENKKGFFGWFNRMFDKSTNHYTD SIGGILRSTGRYLLIYIIIVGMAFLVRLPSSFLPDEDQGV  
FLTMAQLPAGASQERTQKVLDEVTDYLTKEKANVESVFAVNGFGFAGRGQNTGIAFVSLKDWSESGDENKVEAITGR  
AMGTFSQIKDAMVFAFNLPAIVELGTATGDFDQLIDQGG LGHEKLTQARNQLFGEIAKHPDLLVGVVRPNGMEDTPQYKI  
DIDQEKAQALGVISDINTTLGAAWGGSYVNDFIDRGRVKKVYIMSEAQYRMLPNDINN WFVRGSDGQMVPFSAFSTS  
HWEYGSPRLERYNGLPSMEILGQAAPGKSTGEAMNLMEELASKLP SIGYDWTGMSYQERLSGNQAPALY AISLIVVFLC

LAALYESWSIPFSVMLVPLGVIGALLAATFRGLTNDVYFQVGLLTTIGLSAKNAILIVEFAKDLMDKEGKGLIEATLEAVRM  
RLRPILMTSLAFILGVMPLVISTGAGSGAQNNAVGTGVMGGMITATVLAIFFVPVFFVVRRRFSRKNEDVEHSHSVDDH

>AcrF\_Enterobacter

MANFFIQRPIFAWVLAILMIAGGLAILQLPVAQYPTIAPPAVAVTATYPGADAQTVQDQTVQVIEQNMNGIDNLMYMSS  
TSDSAGNVITITLTFQSGTDPDIAQVQVQNKQLQAMPPLPQEVQQQGIGVEKSSSSFLVAGFVSDNKTLTQDDISDYVAS  
NVKDAISRTSGVGDVQLFQAQYAMRIWLDSNALNKFQLTPLDVINQLKIQNNQIAAGQLGGTPSIPGQQNLNASIIAQTR  
LKTPEEFGNVTLVNQDGSMLVHLKDVARELGGENYNMVTKINGQAATGLGIKLATGANALDTAAAIKTKLAELQSFFPQ  
GMRVVYPYDTPFVKISIEHVIKTLFEAIVLVFLVMYLFQNLRLATLIPTIAVPVLLGAFILSAFGFSINTLTMFGMVLAIPLL  
VDDAIVVVENVERVMVEDKLPPKEATQKSMEQIQGALVGIAMVLSAVFIPMAFFGGSTGAIYRQFSLTIVSAMALSVLVAL  
ILTPALCATLLKPASEEHAKGGFFGWFNTLFDKSVHDHYSNSVSGILRKTGRYLVVYVLIVGGMAVFLRLPTSFLPEEDQG  
VFMTMVQLPAGATQTRTQQILDQVQQYYLTQEKANVESVFTVNGFSFSGQGQNSGIAFVSLKPWEDRPGKNGVEAIV  
GRATKAFSQIKDGLVFPFNLPAILLGTATGDFELIDQANLGHSTLTQARNQLLGMVKEHSDLLVRVRPNGLDTPQFKL  
DIDQEKAQALGVSVDINQITISTALGGTYVNDFIDHGRVKKVYAQAAAQFRMLPGDINNLYVRSANGEMVPFSAFSSSR  
WVSGSPRLERYNGMPMEILGESAPGKSTGEAMVMMERLANKLPSGIGYDWTGMSYQERLSGNQAPALYASLIIVFLCL  
AALYESWSIPFSVMLVPLGVIGALLGASLRGLNNDVYFQVGLLTTIGLSAKNAILIVEFAKDLMEKEGKGVVEATLEASRM  
RLRPILMTSLAFILGVMPLVISNGAGSGAQNNAVGTGVMGGMLSATLLAIFFVPVFFVVRRRFRTRQHH

>AcrD\_Enterobacter

MANFFIDRPIFAWVLAILCLTGTAILSLPVEQYPDLAPPNVKITANYPGASAQTLTENTVTQVIEQNMGTGLDNLMYMSSQ  
SSATGQATVTLSTAGSDPDEAVQQVQVQNLQSAMRKLQAVQVQVTVRKTGDSNLTIAFVSTDGSMQKQDISDYV  
ASNIQDPLSRINGVGDIDAYGSQYSMRIWLDPAKLSVQMTATDVTNAIKSQNAQIAGVQLGGTPSVDNQAALNATINS  
QSLQTPQQFRDITLRVNPDPGSEVRLGDVAKVEMGAEKYDNLSRFNGNQASGLGVKLASGANEMATAKLVIDRLDELA  
PYFPHGLEKVFATFETTSFVKASIEDVVKTLLEAIALVFLVMYLFQNLFRATLIPTIAVPVLLGTFAVLYAFGYSINTLTMFAMV  
LAIGLLVDDAIVVVENVERIMTEGLSPRDATRKSMGQIQGALVGIAMVLSAVFVPMMAFFGGTTGAIYRQFSITIVSAMVLS  
VLVAMILTPALCSTLLKPLHKGEQHGQKGGFFGWFNRMFNRNAARYEAGVANILHRSLRWIVYVLLGGMVFLRLPTSF  
LPLEDRGMFITSVQLPSGATQQQTLKVQKVEQYFFTHEKDNIVSVFSTVSGSGPGNGQNVARMFVRLKGWDERDSKT  
GSSFAIERATKAFTRIKEARVFASSPAAISGLSSAGFDMELQDHAGAGHDALMAARDRLDLAGKDPSTLRVRHNGLD  
DSPQLQIDIDQKQALGVSINDINDTLQTAWGSSVNDFMGRGRVKKVYVQAAAPYRMLPDDINLWYVRNNAGGM  
VPFSAFATSHWESGSPRLERYNGYSALEIVGEAAPGVSTGTAMDTMEKLVQQLPAGFGLEWTAMSYQERLSGAQAPAL  
YALSLLVFLCLAALYESWSVPFSVMLVPLGVIGALLATWMRGLENDVYFQVGLLTVIGLSAKNAILIVEFANEMNSKGH  
DLSSTLHACRQRLRPILMTSLAFVFGVLPMATSSGAGSSSQHAVGTGVMGGMISATVLAIVFVPLFFVLVRRRFLKERPE

>MexDYB\_Enterobacter

MPHFFIERPVFAWVIALFIVLTGLLSIPRLPVAQYPAVAPPGLIISVSYPGASPDVMNTSVVSLIEREISGVDNLLYFESSDDT  
GMASITVTFKPGTDIKLAQMDLQNKIKIVEPRLPQAVRQNGLTVEAANSGLMMVGLKSQTGEYQEADLSQDYFARNLTD  
ELRRVPVGKQVQLFGGEKALRIWLDPMKLHSHGLSVTDVLTAVSQQNVIVSPGRGTGDEPAIPGQGVTPITVRGQLSSVE  
AFSQITIKSLTSGARLKLSDIARVESGLQSYAFGIRENGMPATAAAIQLSPGANAIASGIRSRLAELSSVLPEGMEFTVPFD  
TAPFVKLSIMKVVETFAEAMVLVFLVMLLFLHKIRCTLIPAIAPVALLGTFTVMLLSGYSINILTMFGMVLAIIGIIVDDAIVV  
ENVERLMEEKNLSPKEATREAMHEITPAIIGITLVLTAVFIPMGFASGSGVGIYRQFCISVAVSILLSAFLALTLTPALCATLLKP  
HHVGQSKGKSFSAWFNTRFHTLTSFYASGLGFVLKRTGRMMMLYAALCVYAGLSSASSFLPDEDQGYFMSSIQLP  
DATMQRTLKVVKQFEDEIAQQQAIESNIMILGFGSGSGPNSAMAFTTLKNWKKREGRSAQDEADHIQSKMESVPDAV  
TMSLLPPAISDMGTSSGFTYYLQDRGGKGHQAALNADELVQRANKSGQLSDVYIDGLPEGTSLTLNVLDREKAEAMGVS  
FDEINQITISVAMGSNYVNDYTNKGRVQQVIIQADAPYRMQPEHVLALSVMNRLGEMLPSSFVTLNWNVAPQQLMRY  
QGYPISIRITGSASAGESTGTAMNAMEMLAKDLPAGFAGEWAGSSSQEKESASQLPGLIVLSMLVFMVLAALYESWSVP  
FAVMLVPLGLLGAVLAVTVANMTNDVFFKVLITLIGLSAKNAILIEFARQLHQHNVIEATLMASKQRLRPILMTSLAF  
TLGVVPLMLAKGASDSTQHAIGTGFGGMISGTLAIAFFVPVFFVVITRFIETRRKNRESKVQL

>MexFQ\_Enterobacter

MDFSRFFIDRPIFAAVLSILIFITGLIAIPLLPVSEYPDVPSPVQVRAEYPGANPKVIAETVATPLEEAINGVENMMYMKSWA  
GSDGVLVTTVTRPGTDPDQAQVQVQNRVSQAEARLPEDVRRLGITTQKQSPTLTLVVHLFSPGGKYDSLYMRNYATLK  
VKDELARLPGVGQIQIFGSGEYAMRIWLDPNKVAARGLTASDVVTAMQEQNVQVSAGQLGAEPLPKESDFLISINAQGR  
LHTEEEFGNIILKTAQDGSVLRLRDVARIEMGSGSYALRSQLNNKDAVGIGIFQSPGANAIIDLSNAVRKMDDELSTRFPED  
MKWAAPYDPTVFVRDSIRAVVQTLLEAVALVVLVILFLQTRASIPLIAPVPSIVGTFGILYLLGFSNLTLSLFGLVLAIGIVV  
DDAIVVVENVERNIEEGLAPLAAAHQAMREVSGPIIAIALVLCVAVFVPMFLSGVTGQFYKQFAVTIAISTVISAINSLTLSPA  
LAALLLKPHGAPKDYPTRLIDRLFGWIFRPFNRFFHRSSNGYQGLVGKTLGRRGAVFAVYLLLLCAAGVMFKAVPGGFIPT  
QDKLYLIGGVKMPGSSSLARTDAVIRKMSEIGMNTGVDYAVAFPLNALQFTNTPNTGTVFFGLKPFDPQRKHTAAEINA  
EINAKIAQIQQGFGFSILPPILGLGQSGSYLIQDRAGLGYGALQNAVNTMSGSIMQTPGMHFPISTYQANVPQLDVQ  
VDRDKAKAQGVSLTDLFGTLQTYLGSSYVNDNFNQGRWTWRVMAQADGPYRDSVEDIANLRTRNNQGEMVPIGSMVNI  
STTYGDPDVIRYNGYPAADLIGDADPRVLSSTQAMTQLEGMSKQILPNGMNIEWTDLSFQQATQGN TALIVFPVAVLLA  
FLVLAALYESWTLPLAVILVPMTMLSAFLGVWLTGGDNNVFVQVGLVVLMLGLACKNAILIVEFARELEIQKGIGIMEAALE  
ACRLRLRPVIMTSIAFAGTIPLILGHGAGAEVRGVTGITVFSGMLGVTFLGLFLTPVFYVTLRKFTVRGKAERDVLPA

>MexFQ2\_Enterobacter

MLTFFIKRPRFAMVIALVITLLGAIALKLIPVEQYPQITPPVVNVVSASWPGASAADVAEAIATPLETQINGVDHMLYMESTSS  
DEGAYSLNITFAAGTDADLAAIDVQNRVAQAVAQLPADAQQNGVQVRKRATNLMMGVSLYSPEQTHSPLFVSNYAST  
QIREALARLPGVGQVQIFGARDFSMRIWLRPDRMNALNVTDDISQALREQNVQGAAGQVGTTPPVFNQGGQQTTLTING  
LGRLEADAFGDIIIRAGEMQLVRLKDVANIELGSRYSYSSGAQLNGHDSAYLGIYPTPSANALRVAEAVRGELERLSARFP  
ADLTYEVKFDTTEFVAATIKEIGVSLALTLLAVVVIVSLFLQSWRATLIVAIAIPVSLIGTFAVLYALGYSANTLSLFAILALT  
VDDAIVVVENVETLMAEQSRTAATALALRQIAGPVIATTLVLLAVFIPVALLPGIVGELYRQFAVTLSTAVTLSSSLVALTLTP  
ALCAMLRLRPRPARPAAIFRFGFNRLDATTRDAYARLVNVLNHRPLAFIATAGAAAVVVSFTAMPKAFLPQEDQGYFFAS  
VQLPEAASLERTEAVMSTARQLIAANPAVADVQVSGFNLLNGTSASNGGFISVMLKDWSERPPLDEVMGTLQRQLLAL  
PEATIMTFAPPTLPGLGNASGFDLRIQAQAGQSPADLERVTREVLAKANQHPQLSRVFTTWSSNVPQLTSLVDRERAARL  
DVPVSRIFSSLQTAFGGTRAGDFSINNRVYHVVMQNEMQWRERAQISELYVRSNNGERVRLSNLVTITPTVGAPFLQQ  
YNQFPSVSVSGSAAPGVSSSTAMAAMGQLLDNLPAGYDYAWSGMSYQEQQTGNQAVWIVLAAVVMAWFLVAQ  
YESWTLPASVMSVLFAIGGALTWLWMAGYANDVYVQIGLVLLIALAAKNAILIVEFARARRNEGMAIVDAAREGASRRF  
RAVMMTAVSFIIGVLPMLLATGAGAQSRRRIIGTTVFSGMLVATTVGIVFIPALFVLQRLREWGHRLTGE

>MexB\_A\_borkumensis

MARFFIDRPIFAFWVIAIIMMMAGALAIYTLPIEQYPTVAPPQVSIAGNYPGASAKTVEDSVTQVIEQQMNIGIDNLLYMSSS  
SDSFGNAAVNLTFAPGTDPDIAQVQVQNKQLATPLLPQEVQQQGMQVTKSSDSFLMVAGFTSEDGSLRADLADYV  
ASNVQDPVSRVPGVGQIQIFGSPYAMRVWLDPNKLNKFDLTPQDVTQTIEVQNNQVASGQLGGAPAVEGQQQLNATII  
AQTRLEDVDQFENILLKVNPDGSRVFLKDVARVELAAQNYDVQGRYNGQPAAGLAISLATGANALDTAEALRARLAELQ  
PYFPDKMEMVFPYDTPFVVISIEEVVHTLFEAILVFLVMYFLQNFRA TLIPTLAVPVVLLGTFAVLAAGFSINTLTMFGMV  
LAIGLLVDDAIVVVENVERVMHEEGLPPKEATRSMGQITGALVGIALVLSAVFVPMFAFFPGSTGAIYRQFSITIVSAMVLS  
VLVALILTPALCATMLKAKDSEHQTDHGFFGWFNRTFDKSSRRYQGSVEKILGRRGRYLFYVWVIVGVLGFSFMRLPSSFLPE  
EDQGILFTLVTL PAGSTQEQT VVKLEKMEDYYLNEEASAVDGLFTVAGFSFTGRGQNAGMAFVNLKDW SERDLSVDGA  
DNVVARAMGYFSTIREAMMFALNPPSIPELGNASGFDQLLDQSGQGHEALIQARNQMLGMAAQDPRLAGVRPNGL  
DSPQYQIDIDQKAKALGLSISDINSTLQIAWGSSYVNNFVDRGRVKRYVQADAPYRMLPENVDWVFRNNQGMV  
PFSTFATGHWTYGGSPKLERYNGVSSVNIQGNAAPGYSTGDAMDAMEELSAKLPAFGFEGWTGMSYQERQSGDQAPAL  
YVISLLVFLCLAALYESWSIPFAVMLVPLGILGAVLAATFRDLNNDVFFQVGLLTTIGLSAKNAILIAEFALELEQKGEHLLK  
ATLEAVRMRLRPILMTSLAFMLGVTPLMISTGAGAGARNAIGTG VFGMLTATVLAIFFIPLFYAVRKLSGVPLDGKKKGK  
E

>AcrB\_P\_carotovorum

MAKFFIDRPIFAWVLAIMVMLTGLLAIVKLPIAQYPTIAPPAIDVTATYPGADASTLQDSVTQVIEQNMNGIDNLMYMSSSDSSSGTVQITLTFEAGTDPDIAQVQVQNKQLQAMPLLPQEVQQQGVNVQKSSSSFLMVAAFISEDGKMSQEDIADYVAANVKDPISRTSGVGDAQLFGSQYAMRIWLDPNKLNNYQLTAGDVTAAIRVQNNQIAAGQLGGAPPVPGQQLNASIIAQTRLNSAEFEFSKILLKVNADGSQVRLKDVARELGAEGYDVIARFNGKPAAGIGIKLATGANALDTATAVKEALTKAEEFFPAGLKVVYPYDTPFVKISINEVVKTLVEAIVLVFLVMYFLQNFRAFLIPTIAVPVLLGTFAISAFGYSINTLTMFAMVLAIGLVDDAIVVVENVERVMAEEGLPPKEATKRSMEQIQGALVGIALVLSAVFVPMMAFTGGSTGAIYRQFSITIVSAMVLSVMVALILTPALCATLLKPIAKGDHSEKTGFFGWFNRLFEEKSTHHYTDVANILRSTGRYLVIIYLLIVVGLALLFLRLPTSFLPDEDQGVLLNIVQLPSGATQENTQKIMDRMTQYYLENEKGNVKS VFTVTGFGFSGRGQNAGLAFASLNDWSERGAENKVMIAIGRANAAFSQYKEAMVFAVNLPAIIELGATGDFDQLIDQANLGHAKLTEARNQLLGMAAQRPDITLEQVRPNGMEDTPQFRLDIDQEKAQALGVSLSDISSTLATTGGSYVNDFIDRGRVKVYVQADAPFRMLPDDIKNWYIRGSNGQMVPFSAFTQSHWEYGSPRLERYNGQPSMQIQGQAAPGKSTGEAMALMESFVAQLPQGIGYEWTGMSYQERLSGNQAPAIY AISLIVFLCLAALYESWSIPFSVMLVPLGIIGALIAANMTGLENDVYFKVGLTTIGLSAKNAILIVEFAKDLMEKEGKGLIEATLDAVRMRLRPILMTSLAFILGVMPLVISSGAGSGAQNNAVGTGVMGGMITATVLAIFFVPVFFVVVRRRFGKKVDDTTAH

>AcrD\_P\_carotovorum

MANFFVDRPIFAWVLAILSLCGMLAIKSLPLEQYPDAPPVSRITASYPGASAQTLNENTVTQVIEQSMTGLDNLMYMSSSDSSNTGQARVMLTFEAGTNPDEARQQVQVQNLQSAIRKLPQEVQQQGVTVSKTGDTNLMVAFVSTDGSMQDIADYVATNIQEPISRISGVGEVSAYGSQYAMRIWLDPAKLMDYALTTSDVVRAIESQNSQVSVGGVPSVDNQALNATINAQSLQTPQQFRDITLRVNQDGSVATLANVAEVELGAERYDFLSRFNGQSASGLGVTLASGANELETDKRVRERIDELSRYPHGMEAKIAFETSPFVKASITDVVKTLEAVLLVFLVMYFLQNFRAFLIPTIAVPVLLGTFAVLYACGFSINTLTMFAMVLAIGLLVDDAIVVVENVERVMSEEGLSPREATRKSMDQVQVQALVGIALVLSAVFVPMMAFFGGTTGAIYRQFSITIVTSMILSVLVAMILTPALCATLLKPLAKGQHHGRKGFFGWFNRSFTRTSLKYERGVGKILMSSSGRWLLLYMGIIGVMAFLFRRLPTSFLPQEDRGVFTTQVQLPPGSTQQQLQVVKIEQYYLTQEKDTVTSVFSTIGSGPGGNGQNVARLFIRLKDWNERTTPESSFVAVIERATKAFRHIQEARVFASSPPSINGLSAAGFAMRLQDRGGLGHDALMAARDQLLNMAADSNPELTRVRHNGLDSSQLRIHIDQRKAQALGVSVDDINSTLKTGWGSTYVNDFLDRGRVKVYVQAAAKFRMLPDDISKWYVRNRRGGMVPFSAFAQTVWETGSPRLERYNGYSSLEIVGEAMPGVSTGTAMTVMESLVAKLPEGFLEWTGMSLQERLSGAQAPALY AISLLVFLCLAALYESWTVPFVSVMLVPMGVLGALVATWARGLENDVYFQVGLLTVVGLSAKNAILIVEFANEMNQKGKDLVEATLEASRQRLRPILMTSLAFIFGVLPMATSSGAGSASQHAVGTGVIGGMLAATFLAIFFVPLFFVVVRRRFLPEKLTLE

>AcrB\_E\_tasmaniensis

MAKFFIDRPIFAWVIAIIIMLAGALSILKLPQYQPNVAPPAIEITAAYPGADAKTLQDSVTQVIEQNMNGIDGLMYMSSSSSDSSGALQLTLTFESGTNADIAQVQVQNKQLLATPLLPQEVQQQGVNVQKSSSSFLMVAAGFINDNDTMTQNDIADYVGSNIKDPISRVTVGVDQTLFGAQYAMRIWMDPHKLNYYQLTPVDVISAINQNAQVAAGQLGGSPVKGQQLNASIIAQTRLTSPEEFGKILLKVNTDGSVRVRLSDVAHIELGGENYEIARFNGKPAAGIGIKLATGANALDTASAVKAELSKLEPFPSGLKVVYPYDTPFVKISINEVVKTLVEAIVLVFLVMYFLQNFRAFLIPTIAVPVLLGTFAIINTFGYSINTLTMFGMVLAIGLLVDDAIVVVENVERVMAEEGLPPKEATKRSMDQIQGALVGIALVLSAVFIPMAFFGGSTGVIYRQFSITIVSAMVLSVIVALVLTALCATMLKPIAKGEHGKTTGFFGWFNRMFDKSTHHYTDVGHIVRSTGRYLLIYLLIVVGMAFLFLRLPSSFLPEEDQGVFLTMAQLPAGATQERTEKVLQVTDYYLNNEKANVNSVFTVNGFGFAGRGQNTGIAFISLKPWDERPGAENKVPPIAGRAMTALSAIKDAMVIPFNLPAIVELGTATGDFDQLVDQGGGHEKLTAAARNQLLGMIQHPD TLVGVPRNGLEDTPQFKLSIDQEKALQALGVSLSNINTTLAAAWGGSYVNDFIDRGRVKVYVMAAAPYRMLPDDIGNWYVRATNGEMVSFNAFSSAQWVYGSPLRLERYNGLPSMELLGQPAAGKSSGEAMNLMQELAGKLPTGIGYDWTGMSYQERLSGNQAPALY AISLIVVFLCLAALYESWSIPFSVMLVPLGVIGALIFTTLRGLSNDVYFVGLTTIGLSAKNAILIVEFAKDLMDKEGKGLIEATLEAVRMRLRPILMTSLAFILGVLP LAISSGAGSGAQNNAVGTGVMGGMVTATVLAIFFVPVFFVVVRRRFGKNKEDGERSHAVDNH

>AcrD\_E\_tasmaniensis

MANFFIDRPIFAWVLAILLCLTGGLAIVSLPIEQYPDAPPNVIRITANYPGASAETLNTVTQVIEQNMTGIDNLMYMSSQSNTGQATVTLTFEAGTNPDEARQQVQVQNLQTAMRKLPQDVQSQGVTVNKTGDTNLMVAFVSTDGSMQDRQDISDYV

ASHLQDPLSRINGVGQVDAYGSQYAMRIWLDPDKLIDYALTTEVVDAIKSQNSQIAVQGQLGGLPSVPSQALNATINSQ  
SLLQTPEQFRAITLRVNTDGSVVTLGQVARIELGAKEYDYLSRYNGMDASGLGIKLASGANELQDRTLVRARLDELSRFFPH  
GLKAEIAFETSPFVKASIEDVVKTLFEAVLLVFLVMYLFQNFRAITLIPTIAVPVVLFGTFGVLYAFGYSINTLTMFAMVLAIGLL  
VDDAIVVVENVVERIMTEEGLSPRDATRKSMTGQIQGALVGIALVLSAVFVPMMAFFGGTTGAIYRQFSVTIVSAMVLSVLVAM  
ILTPALCSTLLKPLAQGSHHGRRGFFGWFNRMFNHNAERYKDGVGKMLAKGGRWLLVYLALIGVMALLFIRLPGSFLPLE  
DRGIFTTQVQLPPGSTLQQTMMKVVEKVEHYLLTHEQNNVLSVFATVGAGPGGNGQNVARLFVRLKDWQDRHGSDNSS  
FAIIERATRAFRSINEAKVVASSPAAITGLGNSAGFDMELQDNAGLGHRAIMSARNTLLDMAQKNPSLTRVRHNGLDDS  
SQLRIDIDQRKAQALGISLDDINATLQGTGWSSYVNDFLDRGRVKKVYVQADAPFRMLPDDISKWYVRNDSGGMVPFT  
AFARSHWESGSPRLERYNGYSALEIVGESATGVSNGAAMDVMEKLVAQLPVGISLQWTGASLQERMSGAPALYALS  
LLVFLCLAALYESWSIPFSVMLVVPLGLVGLIATWLRGLENDVYFQVGLLTVIGLSAKNAILIVEFANEINARGQELVAAT  
LEASRQRLRPILMTSLAFIFGVLPMAISQAGSSSQHAVGTGVLGGMISATVLAVFFVPLFFVMVRRRFLPKDKIR

>MexB\_P\_fluorescens

MSKFFIDRPIFAWVIALVIMLVGALSILKLPINQYPSIAPPAIAIQVTYPGASAQTVQDTVQVIEQQNLNGIDNLRVSSSEN  
SDGSMITITATFEQGTNSDTAQVQVQNKLNLATPLLPQEVQQGIRVTKSVRNFLMVIGVVS RDGSMTREDLSNIYVSN  
MQDPISRTAGVGDFQVFGAQYAMRIWLDPAKLNNFNLTVPDVSTAITAQNVQIASGQLGGLPAMPQQQLNATIIGKTR  
LQTAEQFKAILLKVNPDGSQVRVGDVADVALGGENYSINAQFNGAPASGLAVRLATGANALDTAKALRKTVDLKPFFP  
QGLEVVFPYDTPPVVSESIKGVVETLVEAIVLVFLVMFLFLQNFRAITITMTVPVLLGTFGILAAFGFSINTLTMFGMVLAIG  
LLVDDAIVVVENVVERVMSEGLSPKEATKKSMTGQIQGALVGIALVLSAVLLPMAFFGGSTGVYKQFSITIVSAMALSVLVA  
LIFTPALCATMLKPIPKGEHGIPKRGFFGWFNRTFDRGVRSYERGVGNMLKHKAPYLLAYIIIVGMVWLFTRIPTAFLPEED  
QGVLFQVQTPAGSSAERTQVVVDKMMREFLLRPSKDGEGDGVASVFTVTGFNFAGRGQSSGLAFIMLKPWEERNADN  
TVFKIAGRAQQHFFSFRDAMVFAFAPPAVMELGNATGDFVFLQDRAGIGHDKLMEARNQFLGMAAQSKILAQVRPNG  
LNDEPQYQLEIDDEKASALGITLSEINNTLSIALGSSYVNDFIDRGRVKKVYVQGP NARMSPEDLQKWYVRNSAGTMVP  
FTAFKGEWVYGSPKLARYNGVEAMEILGTPAPGYSTGEAMAEVEAIAKKLPAGVGISWTGLSYEERLSGSQAPALYALSL  
LMVFLCLAALYESWSIPIAVMLVVPLGIIGALMATSLRGLSNDVYFQVGLLTTIGLAAKNAILIVEFAKELHEQGRTLVEAAVE  
ACRMRLRPIIMTSLAFVLGVVPLAISTGAGSGSQHAIGTVIGGMLTATILAFWVPLFFVTSSIGRRKNTDEHDTPTSKE  
AGQ

>AcrDMexB\_P\_fluorescens

MARFFIDRPIFAWVIAIVIMLAGALSISQLPLEQYPDIAPPTVRISATYTGASAKTVEDSVTQVIEQQMKGLDNLTYSASSS  
SDGSASISLFTAGTNPDAQMQVQNKLQQAESRLPQPVQSEGLTVTKGGSDFLMIAALASDNPSVTGTQIGDYISSTLL  
DSISRIDGVGDVQTLGSGYAMRIWLDP TLLEKYALMPSDVSTALEAQNTEVSAGQLGAMPVAVKGQQLNATISARSKLQT  
VEEFRNWWWKSTSDGAVVLLGDVARVELGSESYDVSSALNGKPAAAMGVQLAAGANALNVGEAVKAKLKELEFPYPTM  
QLKNVIAYDTPFVSLSIEEVVKS LG E AIVLVLMFLFLQNL RATLIPAITVPVLLGTFGVLALFGYSINTLTMFAMVLAIGLL  
VDDAIVVVENVVERVMGEQGLSALDATRRSMDEITSALVGIALVLSAVFIPMAFFGGSTGVYRQFSVTIVSAMVLSVLVAM  
TLTPALCATLLKPSDGQGHGAQRGFFGWFNRTFERAAEAYKRQVGILQRGRVGLVYGLVLLVMAAGYFSLPTSFLPD  
EDQGILMAQVQLPVGATDSRTQAVVKQFESYLLEQPEVEALISISGLGMNGNSQNSARAFIRLKDWSERTGAGQDAASF  
AQRATMALSSIGDANVFMQPPAVRGLGQTSGFDLQLKDLAGLGHDTLVAAREKLIELANQDPRLLGVRNSGLDDAPQ  
LKVSIDDRKAGALSSTSDINTTLSTALGGTYVNDFLNQGRVKKVYVQGEAAARMQAADLEHWVVRNSNDEMVPFSSFA  
SSWSYSGSPLLERYNGNASLEVVGDPAPGVSSGDAMD AVEALVKQLPEGIGYEW TGQSYQLRLSGSQAPLLYGISVLVVF  
LCLAALYESWSVPFSVMLVVPLGVVGAVLATRVSGLSNDVYFQVGLLTTVGLAAKNAILIVEFAKHLQE QGNSLREATLIA  
VRQRLRPILMTSLAFMFGVLPLALSSGAGSAGRQAIGTVLGGMLSATVLGIFVPLFFVQIRRRFGRVSTASTSVPSAQSG  
DA

>MexDY\_P\_fluorescens

MPQFFIDRPVFAWVVALFILLAGILAIPQLPVAQYPPVAPPQIEITYVYPGASAQTVDESIVSLIEEELNGTDNLLYFESQSSL  
GSATITATFQPGTNPELAQVDVQNR LKAVESRLPQAVTQQGLQVDKVSAGFLLLITLTSSDGKLLDDVALSDYLARNVMN

EIKRLDGVGKAQLYGAERAMRIWIDPQKLVGFNLT PADVNAAIVAQNAQVSAGSLGDLPSRSTQEITATIVVKGQLNTPQ  
EFADIVLKANPDGSTVRIADVARVEIGSQEYQFSTRLNGKPSTAVAVQLSPGANALNTATLVRNKMDELSRYFPAGVEYKI  
PYDTSPFVKVSITKVIYTLGEAMLLVFAVMFLFLQNIRYTLIPTLVVPVALMGTFATMLALGFSINVLT MFGMVLAIGILVDD  
AIVVVENVERIMAEGLSPKEATRKAMGQITGAIIGITLVLVAVFIPMAFMQGSVGVYQQFSLSMATSILFSAFLALTTPA  
LCATLLKPVAKGDDHHAKTGFFGLFNRGFDRFGERYQGWVAYALKRSGRYLLIYGVLLVGMGLLFSRLPSSFLPVEDQGYTI  
TDIQLPPGASKNRTVQVVEQIEAHNAGEPGVGDSTIILGFSFSGSGQNAALFTTLKDWSQRGADDSAA SIADRANLALG  
QIKDAMAFSVLPPPVDGLGTSSGFEFRLQDRGGLGHATLMQARSELLAAADKSPMLMNVRESALAEAPQVQLEVDRKQ  
ANALGISFADVGSVLSTAVGSAYINDFPNQGRMQRVVVQAEQDQRSQVEDLLKIHVRNNSGKMVPLSAFVQARWSQG  
PAQLTRYNGYPAVISGEPAGYSTGQAMAEIERLVALGPTGLGQEW TGLSLQERLSGSQAPILLGLSLLVVFCLAA LYES  
WSIPTSVLLVPLGVLGAVLAVSLRGM PNDVFFKIGLITIIGLSAKNAILIEFAKSLYDEGHDLIDATLQAARLRLRPIIMTSLA  
FILGVVPLAIATGASSASQQAIGTG VIGGMISATLAVVFPVFFVVMKRVRRVDPKG

>MexFQ\_P\_fluorescens

MKFSQFFISRPIFA AVL SLLILIAG AISLFQLPISEYPEVVPPTVVVRANFPGANPKVIGETVAAPLEQAITGVENMLYMSSQST  
ADGKITLTITFALGTDLDNAQVQVQNRVTRTEPKLPEEVTRIGITVDKASPD LTMVVHLTSPDKRYDMLYLSNYALLNIKDE  
LARLGGVG DVQLFGMGDYS LR VWLDPNKTASRNLTATDVVTAIREQNRQVAAGALGAPPAPNAQAFQLSINTQGR LV  
NEEEFENIIIRSGANGEITRLKDIARVELGSSQYALRSLLDNQPAVAIPIFQRPGSNAIQISNDVREKMD ELKKGFPAGMDYSI  
VYDPTIFVRGSIEAVVHTLFEALILVVLVILFLQ TWRASIPLVAVPVSLIGTFAVMHLFGFSLNALS LFGVLVAIGIVDDAIV  
VVENVERNIELGLTPVEATKRAMGEVTGPIIATALVCAVFVPAAFISGLTGQFYKQFALTIAISTVISAINSLTSPALAAVLLK  
GHDAPKDRFSKFLDKVFGGWLF RPFNRFFERASHGYVGTVARVIRSSGIALVLYAGLMVLTFFGFSNTPTGFVPGQDKQYL  
VAFAQLPDAASLDRTE DVIKMSDLALKQPGVESAVAFPLSINGFTNSPNAGIVFVTLKPFDERKDPSMSAGAIAGALN  
GQYAGIQEAYMAIFPPPPVQGLGTIGGFRLQIEDRGNLGYDELYKETMNIITKSHNVPELAGLFTSYTVNVPQVDA AIDRE  
KAKTHGVAUSDIFDTLQIYLGSLYANDFNRFGR TYQVNVQAEQQFRLESDQIGQLKVRNNRGEMIPLATFIKVS DTS GPD  
RVMHYNGFITAEINGAAAPGYSSGQAEKAIEKLLKDELPNGMTYEWTDLT YQQILSGNTALFVFP LCVLLAFLVLA AQYES  
WSLPLAVILVPM TLLSAITGVILSGDNNIFTQIGLIVLVGLACKNAILIVEFAKDKQLEGMNPLAAVLEACRLRLRPILMTSF  
AFIMGVVPLVFSSGAGAEMRHAMGVAVFSGMLGV TFFGLLLTPVFYVLIRNFVERSEARKAARALKLEAQQ

>MexIW\_P\_fluorescens

MAFTDPFI RRPVLATVVSLLIVLLGFQAWSKLPLRQYPQMENALITVTTAYPGANAETIQGYITQPMQQSLASAEGIDYMT  
SVSRQNF SVISVYARIGSNSDR LFTELLAKANEVKNQLPQDAEDPVLSREAADASALMYISFFSKELNNPQITDYL SRVIQP  
KLATLPGMAEAEILGNQVFAMRLWLDPVKLAGFGLTAADVTNAVRQHNFLSAAGEVKGEYVVT SINANTELKSAEAFGAI  
PLKTDGDSRVLLRDVARVEMGAENYDTISSFGGTPSVYIGIKATPGANPLDVIKEVRKIMP DMEAQLPTNLKAEIAYDATLF  
IQASIDEVVKTLFEAVLIVIVVFLFLGALRSVVIPVVTIPLSMIGVMFFMQLMGYSMNLLTLLAMVLAIGLVDDAIVVVENI  
HRHIEEGKTPFDAAIEGAREIAMPVVSMTITLAAVYAPIGLLEGLTGALFKEFALTLAGAVVISGIVALTSPMMCALLLRHDE  
NPSGLAHR LDMVFERLKSRYQRMLHGTLNTRPVVLVFAVIVLLIPVLIMFTKSELAPDEDQGIIFMMATAPQPTNLDYLN  
TYTDHFITIFKEFPEYSSSFQINGYNGVQSGIGGFLLKPWNERSRTQMEILPEVQAKLESVPGLQIFGFNLPSLPGTGEGLPF  
AFVINS PKDYATLLEVADRVKKRALES GKF AFMDIDLAFDKPEVVVDIDRAKAAQMGVSMQDLGGTLATLLGEAEINRFTL  
EGRSYKVIAQVERPFRDNPDWLN NYYYVKNAGESLPLSTLIKVS DRARPRQLNQFQQ LNAV TISGFPIVSMGEAIETVRQI  
AREEAPVGFAFDYAGASRQFVQEGSALWVTFALALAIIFLVLAAQFESFRDPLVILVTVP L SICGALIFLGLWSSMNIYTQV  
GLVTLIGLISKHGILIVEFANQLRREQNLTPREAVEQAASIRLRPVLMTTAAMVFGMVPLIFATGAGAVSRFDIGMVIATGM  
SIGTLFTLFVLPCVYTLLAKPKDS

>MexB\_P\_putida

MSKFFIDRPIFAWVIALVIMLVGALSILKLPINQYPSIAPPAIAIAVTPGASAQTVQDTVVQVIEQQ L NGIDNLRYSSESNS  
DGSMTITATFEQGTNPDTAQVQVQNKLNLATPLLPQEVQQQGRVTKAVKNFLLVIGLVSEDGSM TKDDLANYIVSNM  
QDPISRTAGVGDFQVFGAQYAMRIWLDPAKLNKFQLTPVDVKTAVAAQNVQVSSGQLGGLPALPGTQLNATIIGKTRL  
QTAEQFESILLKVNKDGSQVRLGDVAQVGLGGENYAVSAQFNGKPASGLAVKLATGANALDTAKALRETIKGLEPFFPPG

VKAVFPYDTPVVTESISGVIHTLIEAVVLVFLVMYFLQNFRATIITMTVPVLLGTFGILAAAAGFSINTLTMFAMVLAIGLL  
VDDAIVVENVERVMSEGLPPKEATKRSMEQIQGALVGIALVLSAVLLPMAFFGGSTGVIYRQFSITIVSAMGLSVLVALIF  
TPALCATMLKPLKKGEHHTAKGGFFGWFNRFNDRSVNGYERSVGAILRNKVPFLLAYALIVVGMWLFARIPTAFLPEEDQ  
GVLFAQVQTPAGSSAERTQVVVDQMREYLLKDEADTVSSVFTVNGFNFAGRGQSSGMAFIMLKPWDERSKENSVFALA  
QRAQQHFFTFRDAMVFAFAPPAVLELGNATGFDVFLQDRGGVGHEKLMERNQFLAKAAQSKLSAVRPNGLNDEPQ  
YQLTIDDERASALGVTIADINNTLSIALGASYVNDFIDRGRVKKVYIQGEPSARMSPEDLQKWYVRNGAGEMVPFSSFAKG  
EWTYGSPKLSRYNGVEAMEILGAPAPGYSTGEAMAEVERIAGELPSGIGFSWTGMSYEEKLSGSQMPALFALSFLVFLCL  
AALYESWSIPIAVVLVPLGIIGALIATSLRGLSNDVYFLVGLTTIGLAAKNAILIVEFAKELHEQGRSLYDAAIEACRMRLRPII  
MTSLAFILGVPLTIASGAGAGSQHAIGTGVIIGMISATVLAIFWVPLFFVAVSSLFGSKEPEKDVTPENPRYEAGQ

>MexDY\_P\_putida

MPQFFIDRPVFAWVVALFILLAGALAIQPLPAQYPNVAPPQVEIYAVYPGASAATMDESVSLEQELNGADNLLYFESQ  
SSLGSATITATFAPGTHPDLAQVDVQNRKLVVESRLPRPVTQQGLQVEKVSTGFLLLATLTSEDGKLDETALSILARNVM  
DEIRRLKGVGKAQLYGSERAMRIWIDPRKLIGFNLTPNDVAEIAAQAQVAPGSIGDLPSRSTQEITANVVVKQLSSPD  
EFAAIVLRANPDGSTVTIGDVARVEIGAQEYQYGTRLNGKPATAFSVQLSPGANAMETATLVRAKMQDLARYFPEGVKY  
DIPYDTSFVKVSIEQVINTLFEAMLLVFVAMFLFLQNLRYLTIPTLVVPVALMGTFAVMLAMGFSVNVLTFLGMVLAIGILV  
DDAIVVENVERIMAEGLPPKQATRKAMGQISGAIVGITLVLVAVFLPMAFMQGSVGVYQQFSLMAVSILFSAFLALS  
TPALCATLLKPVAKEHHERKGGFFGWFNRRFESMSNGYQRWVVQALKRSGRYLLVYAVLLAVLGYGFSQLPTAFLPTED  
QGYTITDIQLPPGASRMTEQVAAQIEAHNAEEPVGNTTILILGFSFSGSGQNAALFTTLKDWSERGADDSAQSIADRA  
TMAFTQLKDAIAYSVLPPPIDGLGESTGFELRLQDRGGMGHAELMAARDQLLESASKSVLTNNVREASLAESPQVQLEIDR  
RQANALGVSFADIGTVLDVAVGSSYVNDFPNQGRMQRVVQAEGDQRSQVEDLLNIHVRNDSGKMVPLGAFVQAR  
WVSGPVQLTRYNGYPAVSISGEPAAGYSSGEAMAEVERLVAQLPAGTGLEWTGLSLQERLSGSQAPLLMALSLVFLCL  
AALYESWSIPTAVLLVPLGVLAGVAVTLRGMPNDVFFKVGLITLIGLSAKNAILIEFAKHLVDQGVDAADAQVQARLR  
LRPIVMTSLAFILGVPLAIASGASSASQQAIGTGVIIGMLSATLAVVFPVFFVVMRLSGRRQAHDSDGQVPVPRES

>MexDY2\_P\_putida

MSRFFIHRPNFAWVVALFISLAGLLVIPSLPAQYPNVAPPQISITASYPGASAKVMVESVTSIIEQSLNGAKGLLYESTNN  
SNGVAEVMVTFEPTDPDMAQVDVQNRKQAEARMPQAVLTQGLKVEQASSGFLLIYALTSTAGNRGDTTALADYAA  
RNINNELLRVPGVGKLQFFASEAMRVWVDPQKLVGYGLSIDDINSAIRGQNVQVPAGSFGSTPGASEQELTATLAVQG  
TLDTPEAFAGIVLRANPDGSSVRLGDVARMAIGSENYNLSARLNGHPAVAGAVQLAPGANAIQTATLVKERLAELSQFFP  
EGVEYSVPYDTSRFDVAIEKVIHTLIEAMVLVFLVMFLFLQNVRYTLVPSIVVPVCLLGTLMIMKLLGFSVNMMTMFGMV  
LAIGILVDDAIVVENVERLMAEGLSPVEATIKAMGQVSGAIGITLVLAAVFLPLAFMSGSVGVYQQFVSLSAVSILFSGF  
LALTFTPALCATLLKPVPHGHHEKAGFFGAFNRGFRVTERYLLNSELVARAGRWMLAYVGILVVLGYSYLRLPEAFVPAE  
DLGYSVVDVQLPPGASRVTDHTAEALEKFLMSRDVANSFIVSGFSFGQGDNAALAFPTFKDWSQRDKAQSAEAETA  
AINAQFAANGDGAITAVMPPPIDGLGNSGGFALRLMDRGGLGREALLAARDQLLARANGNPVILYAMMEGLAEAPQLR  
LHIDREKARALGVSFEAINSTLATAFGSAVINDFTNAGRQQRVVVQAEGQGERMTPESVLRLYAPNANGEQVPFSAFVTTQ  
WEEGPVQLVRYNGYPSIRIAGDASPGHSTGQAMAEMERLVSELPPGIGYAWTGLSYQEKVSSGQAASLALAILVFLLLV  
ALYESWAIPLTVMLIVPIGALGAVWAVTLTGMPNDVYFKVGLITIIGLAAKNAILIVEFAKELWEKGYSLCDAAIEAARLRFRP  
IVMTSMAFILGVPLAIASGAGAASQRAIGTGVIIGMLSATLLGVVFPVCFVWVLTLLKRKPSPVQQAVEEAE

>MexF\_P\_putida

MNFSKFFITRPIFAAVLSLVLLIAGSISLFQLPISEYPEVVPPTVVVRANFPGANPKVIGETVAAPLEQAITGVENMLYMSSQS  
TADGKLTITITFALGTDLDNAQVQVQNRVTRTQPKLPEEVTRIGITVDKASPDLTMVVHLTSPDNRYDMLYLSNYAILNIK  
DELARLGGVGVDVQLFGMGDYSLRVWLDPNKTASRNLTASDVAAIREQNRQVAAGQLGAPPAGSTSFQLSINTQGR  
VNEEFENIIIRAGADGEITRLKDIARVELGSSQYALRSLNNQPAVAIPIFQRPGSNAIEISDEVRAKMAELKKDFPEGMDYS  
IVYDPTIFVRGSIEAVVHTLFEALVLVVLVILFLQTWRASIIPLLAVPVSLIGTFVVMHLFGFSLNALSFLGLVLAIGIVDDAIV  
VVENVERNIGLGLKPLEATQKAMSEVTGPIIATLVLCVAVFPAAAFISGLTGQFYKQFALTIAISTVISAFNSLTLSPALAAVLL



KDHHAPKDRFSRFLDKLLGSWLFSPFNRFFDRASHSYVGGVRRVIRSSGIALFVYAGLMGLTYLGFSSPTPTGFVPAQDKQY  
LVAFAPQLPDAASLDRTEAVIKRMSEIALKQPGVADSVAFPGLSINGFTNSPNSGIVFTPLKPFDERKDPSQSAAAIAAALNA  
QFADIQDAYIAIFPPPPVQGLGTIGGFRLQIEDRGNLGYEALYKETQNIIAKSHNVPELAGLFTSYQVNVQVDAADREKA  
KTHGVAITDIFDTLQVYLGSLYTNDNFNRFGRTYQVNVQAEQQFRLDAEQIGQLKVRNNLGEMIPLATFLKVS DTS GPDRV  
MHYNGFITAEINGAAAPGYSSGQAEAAIEKLLKEELPNGMTFEWTDLTYYQQILSGNTALLVFPLCVLLAFLVLAAYESWS  
LPLAVILVPMITLLSAITGVIVSGDNNIFTQIGLIVLVGLACKNAILIVEFAKDEQAKGLDPLAAVLEACRLRLRPILMTSIAFI  
MGVVPLVFSSGAGSEMRHAMGVAVFSGMIGVTVFGLFTPVFFFLIRRFVERRQARKAEHAQVLENHA

>MexW\_P\_putida

MAFTDFTIQRPVLASVVSLLILLGFQAWNKLQIRQYPQMENALITVTTAYPGANAETIQGYITQPLQQSLASAEGIDYMT  
SVSRQNFISIYARIGADSDRLFTELLAKANEVRNKL PQDSEDPVLSKEAADASALMYVSFYSKEMSNPQITDYLRSVIQPK  
LATLPGMAEAEILGNQVFAMRLWLDPVKLAGFGLSATDVTNAVRRYNFLSAAGEVKGEYVTSVNASTELKSAEFAALP  
LKTSGDSRVLLGDVARVEMGAENYDTVSSFDGTPSVYIGIKATPAANPLDVIKEVRRIMPELESQ LPSALNVSIA YDATRFIQ  
ASIDEVIKTLGEAVLIVVVVFLFLGALRSVLIPVVTIPLSMIGVLFFMQMMGYSLNLLTLLAMVLAIGLVDDAIVVVENIHR  
HMEEGKSPFDAALEGAREIAMPVVSMTITLAAVYAPIGFLTGLTGALFKEFALTLAGAVIISGIVALTLSPMMCALLRREQN  
PSGLAHLRLDQLFERLKGRYQRLHATLDSRPVVLVFAVILCLIPVLLKFTQNELAPNEDQGVIFMMSSSPQ PANLDYLNAY  
TDQFTPLFKAFPEYSSFQINGFNGVQTGIGGFLKPWNERERTQMELLPLVQAKLEEISGLQIFGFNLPSLPGTGEGLPFQF  
VINTAGDYPALLDVAQRIKTRAQESGKFAFLDIDLAFDKPEVVVDIDRAKAAQMGVSMDTLGGTLATLLGAEINRFTLEG  
RSYKVIAQVERPYRDNPGWLNNYYVKNDDQGQLPLSTLITLDRARPRQLNQFQQLNAAIIGVPMVSLGEALKTVQDI  
AREEAPEGFADFYAGAARQYVQEGSALWVTFGLALAIIFLVLAQFESFRDPLVILVTVPLSICGALLPLFLGVSSMNIYTQV  
GLVTLIGLISKHGILIVEFANQLRDERGLSVREAEIEAAAIRLPVLMTTAAMVFGMVPLILASGAGAVSRFDIGMVIATGMSI  
GTLFTLFVLCIYTL LAHKASAKAPAIA

>MexI\_P\_putida

MRFTDVFVRRPV LALVSSLIIMGLFAMGKLPIRQYPLLESSTITISTEYPGASAEMLMQGFVTQPITQAVSSVEGIDYLSSSS  
QQGRSLITLRMVLNRDSTQALAE TMAKVNQVRYRLPEKAYDPVVELSAGDSTAVAYVGFASDSL SIPELSDYLSRVVEPQ  
FSGIDGVAKVQSFGGQRLAMRLWLDSEQMAGRGVTAADVAQAVRANNYQATPGQVRGQYVLADIQVDTDLTRVEDF  
RELIIRNDGTDLVRLRDIGTVELSAATQTSATMDGKPAVHLGLFPTPSGNPLVIVEGIRQLLPQIQQTLPPGVYVALAYET  
ARFIDASIHEVLRTLVEAMLIVVLVIWLCLGSLRSVLIAVVAIPLSMLGAAGLMLMFGFSLNLLTLLAMVLAIGLVDDAIVVV  
ENVHRHIEEGKSPIAAALAGAREIAGPVIAMTTLAAVYAPIGLMGGTLGTLFREFALTLAGAVIVSGIVALTLSPVMSSLLQ  
PGQQHGA MAIADRLFGTLSGVYGRVLAYTLAHRWISGGVALLVCLSLPWLYLLPQRELAPPEDQAAVLTAIKSPQHASL  
EYAEERFALKDQVMKSIAETTDTWIINGTDGPAASFGGINLSAWQARERSAAQVQAQLQQAVADIEGSSIFAFQVASLPG  
SSGGLPVQMVLRSAQDYPELFQTMEVLKQRARDSGLFAVVDSDLDYNNPVVKVRVDRAKAASLGISMQAIGESLGLV  
GEQYLNRFALFGRSYDVIPQSIQDQRLTPAALS RQYVRAEDGSLVPLATLVRLDIEVAPNRLLQFDQQNASTLQAIPAPGV  
SMGNAVAFLEQLTAELPPGFSDHWQSES RQYVQEGFALMWAFLAALVVIYLVLAAYESLVDPLIILVTVPLSICGALLPL  
ALGWATLNIYTQIGLVTLIGLISKHGILMVAFANEIQVRDNLDRAAIVRAAQIRLPVLMTTAAMTFGLVPLLFASGAGAN  
SRFGLGVVIVCGMLVGTLFTLFVLPTIYAWLARDHRVSTARARQLVEAERQLGAL

>AcrF\_T\_auensis

MSRFFIDRPIFAWVIAIVIMLAGALAIKSLPIEQYPTIAPPSVRISTSYPGASAQTVEDSVTQVLEQNMTGIDNLLYMSSQSD  
SSGNVTVSLSFLAGTNADTAQVQVQNKVQQALSSLPQTVQDQGV RVEKSTESFLMVAGLISENGEMDQSDISDYMVT  
NIKEPLSRIKGVGTQVIFGSQYAMRVWLDPNKLN SFNLTPGDVTSaitsQNTQISVGQLGATPAVAGQQFNATITGQGRL  
TSMDEFKNILLKVNTNGSQVRLRDVARVELGAESYNAVSRYNKGPASGIAIRLASNANALDTAELVKAKMADLSKYFPTG  
LKVVYPFDTTTTFVKISISEVAQTLVEAVILVFFIMYFLQNFRATLIPTIAVPVLLGTGIMSVFGYTINTLTMFGLVLAIGLLVD  
DAIVVVENVERVMSEEGLSPLEATRKSMQITGALIGIALVLSAVFVPMAFFSGTGAIYRQFSLTIVSAMALSVVVALILTP  
ALCATMLKPVPKGDHGIQTGFFGWFNHMFERNRRYRNTVGRILQRSGRMLVIYVVLGLVWLFTRMPTSF LPEEDQGI  
ALTMVQLPTGATQERTLKVLDKVS DHFTTAEKKNVESVFTVAGFSFAGSGQNMGLAFVKLKDWSERKASDDAASAIIGR

AMGAFSQIKDASIFAFNMSSIPALGNSSGFDLYLQDRGGLGHEKLIERNQLLGMAAKEPSLTRVRPNGMEDTPQYNINI  
DYEKAMALGLTVSDINSTLSTAWGSNYVND FIDRGRVKVYVQADAPFRMQPEHLQLWYVRNAQEQMVPFSAFAEGN  
WSYGSPLRERYNGSSAIDIVGEAAEGYTTGEAMATMTRLISQLPEGIGFEWTGLSYQEESGSQAPALY AISLLVFLCLAA  
LYESWTIPFSVMLIVPLGVVGALAAATLRGLSNDIFFQVGLLTTIGLAAKNAILIVEFAKELFDKGMGIKQAVIEASRMRLRPIL  
MTSLAFILGVFPLVISSGAGASGRHAIGTGVTTGGMIAATVLAIFYVPSFFVLVMKYFSKHRHSLRAPTSAEKHHD

>AcrB\_T\_auensis

MRFTDLFIRRPVLAVTISLMMVFLGLEALRGMAIREYPKVTNTVITVTNNYGGASADVIQGFISQPVEQAIQAENIDYMTS  
RSQLGRSTITVNMRLNTDPNAALADVLAKVNSVRSQLPREADDPSITSSTGSNTSIVYIAFSSAELNSSQITDYLERVIKPOL  
FTVPGVAKVNLYGGTQFAMRVWLDPLKMGAYNLSSTQVLSVLQSNNYQSAPGQATGYFVLYNAEADTQVNSTEQLEE  
LVVASHDGA VIRLRDIAKVSLEKNHDQYRALANGKEAVIAAVDSAPSANPLEIAANVRKLLPDFERNLPNTMNMKLLYDS  
TQAINESIHEVLKTIVEAAAIVLVVIALFLGSMRAVVIPTIPLSLIGVVMMLMQMFGFSINLITLLAMVLAIGLVDDAIVVVE  
NVDRHIKAGEPPFRAAIIGTREIASPVITMTITLAAVYTPIALMGGVTGSIFKEFALTLAGAVFISGVIALTLSPMMCSVMLKP  
HINPNRFERGVENTLNSITSGYSRMLDKVMTRRPVIIIFGIIVLAVMPLLFKLIPAE LAPSED RGAYLMMAKAPNTANLDYIQ  
NNMAAAGETLMKDPAMSTNLALAGIPNNNQGLAIAILKPWSEREKAPVIVQRTNAALQDMPGVAISSFQFPELPGAGG  
GLPLQLVITTPNEFRSLFEVASDALAKIKTNRQFVYTDLDLAFDSATMHI AINRDKAGAYGVSMIAIAETLSTLMGDGNVN  
RVSLNGRSYEVIPQVERQFRLNPESIKHYVTAANGQSIPLSNLVTVDLKSEIRALPHFNQLNSATIGIVPIMPMGDAVTWL  
EENVVSELPLGYQHDYMGEARQYVQEGSALMYTFLLALCVIFLVLA AQFESWRDPLVIMMSVPLAISGALVALAWGLST  
MNIYTQVGII TLVGLISKHGILICEVAREQQLLKGLSKMDAVKIAARVRLRPILMTTAAMVTGLLPLL GAMGAGALSRSFISIGI  
VIVAGLTIGTFFTLFVLPVIYTYVGKTHKPLQEFDESVA PLALHDDE

>AcrBF\_C\_japonicus

MARFFIDRPIFAWVIALVIMLAGVLSISALPIAQYPSIAPPAISATYPGASARTLED SVTQVIEQKMKGLDGLMYMSSTSES  
SGVTVLMLTFTADTNPDIAQVQVQNK LALATPLLPQEVQRQGVTVAKSARNFLMVLGFVSADGSM SNIDIGDYVAANV  
QDIISRV DGVGEVQLFGTQYAMRIWLD PARLQNYKLT PADISNAITAQNAQVSAGQLGGMPAIEGQQLNATVTAQSRL  
QTVEQFRHIILRTNPDGSNVRLGDVAKIELGGD TYDVVARFNGKPAAGLGVKLAAGANALDTAEGVKAKIAELQPFPEG  
LQAVVPYDTPPFVKISIQKVETLIEAVVLVFLVMYFLQNF RATLIPTIAVPVVLGTFGVLA AFGYSINTLTMFAMVLAIGLL  
VDDAIVVVENVERVMTEEKLSPEATR KSMREITGALIGIALVLSAVFVPM AFFGGSTGVYIRQFSITLVSAMALSVLVALSL  
TPALCATLLKAGDHNHDAPKSLIGRFFAGFN RNFERVNKGTRSFVGRMIGQSKRYLVIYGLILLGLGFLFSRLPTAFLPDED  
QGILFNQILLPAGATTERTLQVVEQVEKH FLEEQGD AVKSIFTVTGFSFAGRGQNAAIGFVNLRP WDERTESHLALNAVVG  
KAMGSFSKIRDAMVFAFAPPAVIELGTANGFNHLQDRAGLGH DQLLAARNQLLGMAAQNPVLS SVRPNQGEDKPEL  
QLDIDLAKAGALGVSQADINSTLATAWGGSYVND FIDKGRVKRVFVQGDASSRMNPEDLNQWYVRNSQGDMPVFS A  
FASSHWGYGSPRLERYNGLASMEIQGAAAPGYSTGDAMLAMEELIAKLPPGIGFEWTGMSYQERMTGDQAPLLYALSLL  
VFLCLAAALYESWFVPAAVMLVPLGV LGAVIAATLVKLPNDIYFQVGLLTTMGLASKNAILIVEFAKGRMEQGM DLVAA  
SIEAVRLRLRPIIMTSMAFVCGVLPALATGAGSGAQNALGIGVVGGM L TSAGLAILFVPLFFVLIRRLFPVKKDIEATDEHD  
TH

>MexIW\_C\_japonicus

MKFTDIFIQRPVLSIVVSLILIGIQAASSLSVRQYPRSDIAVIT IETVYVGANAELIRGFITAPIERAVASAEGIDYIASSSVMG  
MSTIKVHLRLNYDPLKAMTEISAKVNQVRGNLPPEAEVPAIRVDSADSEFAAA YLSFSSEILEQNQITDFLTRLVQPRLTAV  
AGVQKAEVLGGRTFAMRIWLKPERMAALNVTPVQVRAALAANNVQAAIGQTRGSY TQVNLRADTDLTSVDEF RQMIIR  
NTADGIVRLSDIADVVLGAESYDVVVNYSGDTAVFMGVWVAPTANSLEV MKAVNEEMEIKSELPTGLSGTVAYDSTEYI  
DAAIHEVIKLTLTETLLIIVLVIFLFGFSRSVIIPVLAIPLSLIGALFIMQICGFSNLNLTLLSIVLCVGLVDDAIVMVENIERHIQEG  
LKPYRAAIVAARELAGPILAMTVTLASVYIPIGLQGGTGTLFREFAITLAGAMTISAVVAITLSPMLGSRMLKPHKGLNAPLE  
KPF EKFTWYAEKLGVSLENRAGIYVFWVVAFLCVPLYMMSPKELAPTEDQGVIFGIVDAQANSTVDQSDFYGRQVNQ  
ALMSFPESDFTFQLTMPTGGFAGLVVKPWGDRERSVNEILPDVQAKLAEISGQKVLPTPPALPGGGQFPFEV LASTADI  
KEIYEYALKIQEIMVKSGKFYFQVLDVKVDQPDYKLSIDRNKVADLGLDLQTVTNDVGTLMGGGYVNRFN MAGQSYKVIP

QVKRIGRLTPDDLNLNLYITGPDGGLIRLDQVASISHTTEPRTINRMQQNLNAVKLSGVPGVPLGEALAFLEDEARKILPKSYSI  
DYTGETRQLVREGNTFLPALTLAIIMIFLVLAQYNSFRDPLVILAGSVPLAMFGALIFTFLKLPMPMPFFTNGFTSTLNIYSQ  
VGLVTLMGLIARNILVVEFANKLQEQGRAKLDAIREAAVLRRLPVMMTSIATIAGHTPLIFASGPGAEARNSIGIVLVLGM  
TIGTFFTLFVLPSVYMLLAKDHQHDHEQLDELEEDISKA

>AcrBF\_Shewanella

MARFFIDRPIFAWVIALIIMLAGILSIRSLPVSQYPSIAPPTVVISANYPGASAKIVEDSVTQVIEQRMTGIDHLRYITSTSDSFG  
NASITLTFNAEADADIAQVQVQNKLGAMTLLPQEVQSQGVNVNKSSSGFLLVLGFVSTDGSLDKSDIADYVGSNVQD  
PMSRVSGVGEIQIFGAQYAMRIWLDPLKLTQYNLTSLDVVAIRAQNAQVSAGQLGGTPSVAGQELNATVSAQSRLQT  
PEEFRKIILKSDTSGANVFLGDVARVELGSESYSVVSLYNGKPATGLAIKLTGANALDTAEAVRAKIAEMKPPFPQGLEVY  
PYDTTPFVEKSIEGVVHTLLEAVVLVFLIMYLFQLNFRATLIPTIAPVVLLGTFAILSATGFSINTLTMFAMVLAIGLLVDDAIV  
VVENVERVMSEEGLSPLEATRKSMQITGALVGIGLTL SAVFVPMAFMSGSTGVYRQFSITIVSAMALSVLVALILTPALCA  
TMLKPLKKGHHGHIEGTFFGWFNRGFDRLTNRYESSVAGIIRGFRVMMIYVALVVAVGWIFMRMPTAFLPDEDQGILFTQ  
AILPTNSTQESTLKVLEKVSDFHMAEEGVRSVFSVAGFSFAGQGQNMGIAFVGLKDWsertAPGADVQSIAGRAMGVFS  
QMMDAFVFAFVPPAVIELGTANGFDMFLQDKNGQGHEKLLAARNQLLGMAAQNPNLVGVVRPNQGEDAPIYQLHIDH  
AKLSALGIEIANVNSVLATAWGGSYVNDFIDRGRVKKVYVQGDAQYRMQPGDLDTWYVRNKNKGMVFPFAFAMGTW  
EYGSPrLERFNGLPAMNIQGATVPGFSTGAAMDIMEDLVKQLPPPGFIEWNGLSYEERLSGNQAPALYALSILVFLVLA  
ALYESWSVPFAVVLVPLGIIGALLAMNGRGLPNDVFFQVGLTTVGLATKNAILIVEFAKEYYEKGAGLVEATLHAVRVRL  
RPILMTSLAFGLGVVPLAISTGVGSGSQNAIGTGVLGMMSSSTFLGIFFVPLFFVIVERIFSKRERKAKDEKPTSAE

>MexBYD\_Shewanella

MPQFFINRPVFAWVIALFIVLIGVIAIPKLPISRYPSVAPVSVSIYAAYPGATPQTLNDSVVSLVERELSGVKNLLYFESSVDSS  
GSAQITATFKPGTDAEMAQVDVQNRKAVEPRLPQVVRQIGLQVESAASSFLMMIGMTSPNGQFDEIALNDYLARNIVE  
ELRRIDGVRVQLFGAEQAMRVWVDPNKLTAISLTMNDLAIAIEQQNAQIAPGRLGDEPVLQGGQRLTVPLTVQGQLST  
PEEFAAIVLRAGADGAKLVLDVAWVELGAQSYGFSNRENGVAATSAAIQLSPGANAVRTASAVRERLAELAPMMPAG  
MNYSPVFDTPAFVKVSIKVIYTLFEAMALVFMVFMFLQLNRYTLIPAIVAPIALLGTFAVMLLAGFSINSLTMFGMVLAIGI  
IVDDAIVVVENVERLMTQGLSPREATSQAMKEITGAVIGITLVLTAVFIPMAFGSGSGVGVYQQFTLSMAVSILFSAFLALT  
LTPALCATLLRPVSADHHQKGGFFGTfNRGFEHLTAGYSERVARLVGRSGRMMAAFVLCMVLLAAGQLPSSFLPEEDQ  
GYFMTSIQLPTGATSERLTDVVKAYEAHVASRPTLDANMVVLGFSFAGSGPNNAAMAFMLKDWQDQRNGATAAEEAAL  
AQQAMADNVEGTVMMLPMPAIDELGTSSGFTLFLQDRANRGEAALIAAQTTLLALAAQSEVVSDVYPDGLPPGESISLNI  
NRSKAEAMGLSFAAVSSTLSAAMGSLYVNDFPNNGRMQQVILQADATARMQLDDVLSLRVRNSSGGMVPLREIVTAE  
WKESPQQMMRFQGFAPMRISGGAAAGVSSGAAMTEMERLVAQLPQGFVAWWTGASLQERQSAAQAPLLMLLSALV  
VFLVLAALYESWSIPLSVMLVPLGLLGAVAAVILRDMPNVFFKVGMITIIGLSAKNAILIVEFARQLHAEGHTLIDAAVTA  
ARLRLRPILMTSLAFTLGVVPLMLASGASAETQHAIGTGVFGGMLSGTLLAIFVPAFFVFIQTQERLSAWLGRNRHNSKM  
AKG

>MexQ\_Shewanella

MNFPRFFINRPFAIVLSVLMIAAGAISYFQLPLSEYPQVTPPTVQVTASYPGANPQVIADTVASPLEQAINGVEGMMYMQ  
SQMSTDGKMVLTSFEQHINADIAQIQVQNRVSRALPRLPEVQRIGVVTEKTAPDILMVVNMLSPGDRYDPLYVSNYA  
MLNVRDELARLPGIANVLLGGEGEYAMRVWLDPEKVASRGMTASDVVAIREQNVQVAAGSIGQQPNASSAFQVTN  
ALGRLTTEEQFGDIVIKAGTHGQVTRLRDVARVELGAENYTMRAQLDGGNTVGIQILMTPGSNALDVSSAVRATMDRLQ  
ASFPEGIEYKIAYDPTVFVRASLQSVAVTLLAILLVVVVVFLQSWRASIIPIAVPVSLVGTFAVMHMFGLNLTLSLFLGLV  
LSIGIVDDAIVVVENVERHMALGESPKDAALKAMDEVTGPILAITSVLA AVFIPSAFLSGLQGEFYRQFALTIAFSTILSAINS  
LTLSPALAAILLKPHHGAAQPDVTRLIDGLFGGFFRRFNRRFDSASNAYVGGVRRAVRGSAVLLLLYVGLGLTWLGFHK  
VPAGFVPAQDKYLVGIAQLPTGASLDRTDAVVKEMSKIALAEPGVESVMAFPGFSGFNGPVNQPNALVFAMLKPFNER  
KDPSLSAFAIQGRLMGKFSQIPDGFGVIFPPPPVPLGSMGGFKLQIEDRAGLGPDALAQAGQIMGKAMQAPELANM  
LASFQANAPQLQVDIDRVKAKSQGVSLTEVFDTLQINLGSLYVNDFNRFGRYRVMTQADAKFRMQAEDIGMLKVRNA

SGDMIPLSAIATISRSSGPDRVMHYNGFPSADISGGPAPGYSSGQATAAIEKIVSESLPDGMTYEWTDLTFQEKRVGNTSIY  
IFALAVLLAFLFLAAQYNWSLPPFAVLLIAPMALLSAIAGVWLTGGDNNIFTQIGFVVLVGLAAKNAILIVEFARAKESEGVD  
PLAAVLEAARLRLRPILMTSLAFIAGVIPLVLASGAGAEMRHAMGIAVFAGMLGVTAFLGLVLTVPFYVVVRKLALRREASQ  
ARVGMSDKHNGQEEF

>MexF\_Shewanella

MLSQFFIKRPIFAAVLSLLFLITGAIAVWQLPITEYPEVVPPTVVVTANYPGANPKVIAETVASPLEQEINGVEDMLYMSSQA  
TSDGRMTLTITFAIGTDVDRAQTQVQSRVDRAMPRLPQEVQRLGIVTEKSSPDLTMVVHLLSPDNRYDMLYLSNYAALN  
VKDELARIKGVGAVRLFGAGEYSLRIWLDPNKVSALGLSPADIIAAREQNNQAAAAGSLGAQPSGSADFQLLINVKGRLTE  
LSEFEDIIKVGQNAEVIRLKDVARVELGATSYALRSLLDNKDAVAIPVFQASGSNAIQISDDVRAEMARLAKSFPEGLQYEI  
VYDPTVTVFRGSIEAVVKTLLVAVLLVVLVVLVFLQTWASIIPLVAVPVSLVGTFAFMHLLGFSNLNLSLFGFLVLAIGIVVDDA  
IVVVENVERNIAAGLSPMAATQKAMKEVTGPVATTLLVAAVFIPTAFMSGLTGQFYKQFALTITISTFISAINSLTSPALSAL  
LLKSHDAPKDGLTRMLDKLFGAWLFVPFNRLFNRASDGYGYLVVRKIVRFGGIIIGLVYLGVMVALTGVQFANTPTGYVPGQD  
KQYLVAFAQLPDAASLERTDSVIKKMSEIALNHPGVAHSIAFPGLSINGFTNSPNSGVVVALDDFELRKSPELSANAIAAGQ  
LNQQFAGIQDAFIAIFPPPPVQGLGTIGGFRLQIQDRANLGYEALYQVTQQVMYKAWADPQLAGIFSSYQVNVNPQLELDI  
DRTKAKQQAVSLDQIFQLQTYMGSTYVNDNFNFRGRTYQVNMQADEAFRQSPQQISQLKVPNVNGDMIPLGSGFINVS  
QSAGPDRVMHYNGFTTAEINGGPAPGVSTGQAQAAIEKILAETLPIGMTYEWTELTYQQILAGNTGLLVFPLVILLVFMVL  
AAQYESLSLPLAIIILPMTLLSALSGVLIYGGDNNIFTQIGLIVLVGLATKNAILIVEFAKEKQDHGMAPMEAILEAARLRLRPIL  
MTSIAFIMGVVPVMVFSTGAGAEMRQAMGVAVFAGMIGVTVFGLLITPLFYALAKRGSKNVVQLEGISTNQHHEKT

>AcrB\_Shewanella

MRLPEVCIRHPIFASVLSIMAVLLGLIAFHKLDIQYFPEHTTHSASVNASIAGASADFMSSNVADKLVAASGLDKVDTMST  
DCSEGRCSLTIKFKDDTTDIEYTNLMNKLRSSEVGINDFPQSMIDKPTVTDDTSATDSASNIITFVNTGGMEKQAMYDYIS  
QQLVLPQLKQVQGVGAVWGPYGGSQKAVRVWLNPQMKALNIKAADVGTLSYNASFTSGAIKGRSDFINPLNQV  
ETLEDVKDLVIKVSDBGKIIRVSDVAEVMGEESLSPSLLSIGGHSAMSLQILPLSNANPVTVASNIKAEIARMQKHLPGGLE  
MNLAYNQADFIEAAIDEGFAALIEAVILVSLIVLFLGSLRAASIPIITIPVCVIGVFAVMSALGFSINVLTIILAILGLVDDAI  
VVVENCYRHIENGETPFNAANGCQEIIFPIIAMTLTAAVYLPIGLMSGLTADLFRQFSFTLAAAVIISGMVALTLSPMMSA  
YLINTTEQQPKWFSRVEGALQQNLHLYINELSKWFTKRQMLGMALVLMGLAGIAYWQLPKILLPVEDSGFIDVAANGP  
TGVGRQYHLDHNSLNGVIDGHPAVGANLSYIEGEPVNHVLLKPWGERREGIDEVIADLIAKSKESVSAYNMSFSIRSADN  
LNIATNVRLTTLDRNKDKLSETAAKVQKLMEDEYPLGTNVGNSVLRDQLRYDLSIDRNAILSGVSYGDTVNALSTFLGSV  
KAADLHATDGFYPIQVQVNLDKLSDFRVMKLYVTSESGQALPLSQFVSINQTTAESNIKTFMGLDSELTADIMPGYST  
DEIKAYLDEQLPTLLTDAQGFKYNGVIKELMDSQAGTQSLFLLALVFIYLILAAQFESFVDPLIILLTVPLCIVGALLTLTLFGQS  
LNIYSQIGLLTLVGLVTKHGILLVEFANKQQQLQGFSIAESALSASAKSRLRPILMTSLTMILSAIPLALASGPGSLGLANIGLVV  
GGLLAGTFFSLFVVPVAYVAMAEKARDVYPSYLMQDSAADFND

>AcrBF\_P\_mirabilis

MPKFFIDRPIFAWVIAITMLAGLLALIKLPVAQYPTIAPPAISAVYPGADATTQNTVTQVIEQNMNGIDNMVYMSSTS  
DSAGMMNITLTFEAGTDPDIAQVQVQNKQLAMPLLPQEVQQQGISVDKSSSSFLMVAGFISGDGMSQDDIADYVG  
ATIKDPLSRVTGVGETQLFGTQYAMRIWLDPKLVKYNMTTLDVINAIKSQNNQVAAGQLGGTPPVPGQRLNVSIIAQT  
RLNTPEQFADILMKVNQDGSQVKLKDGLIVEMGAENYSTIARFNGLPAAGIGIKLATGANALDTATAVRAALADMEPFFP  
SGLEVVPYDTPFVKISIFEVVKTLVEAIMLVFVVMYLFQNFRAFLIPTIAVPVLLGTFAILSAFGYSINTLTMFAMVLAIGL  
LVDDAIVVVENVERVMQEEGLSPKEATRKSMMQIQGALVGIALVLSAVFIPMAFFGGSTGAIYRQFSVTIVSAMVLSVFVA  
LILTPALCATLLKPIPKGSHGVQTGFFGWFNRFVEKSSHHYTDVSRTLRGTGRYLLIYVLLVAAMAIMFVRLPASFLPEEDQ  
GVLLTMVQLPAGSTQEQTQDVLAAQVNDYFNTKEKDVVKSFTVSGFGFGGQGNMGLAFVVLNDWDERKSDQDKV  
PAIVGRANQALSQIKEAFVYSFNIPAIVELGSAGGFELIDNANLGHKEKLEARNQLLGMAAQEPQMLTGVRPNGQED  
TSQYRLYIDLEKAQAQGVAVSDIYSTLGTMTFGGSYVNDFIDRGRVKVYVQAESQFRMLPQDIANLYVRNAGQMVPF  
SSFIDTSKDPWLYGSPRLERYNGLPAVQIQGSATPGQSSGDAMLMMEQLASKLPSGIGYEWGTGMSYQERLSGNQAPAL

YTISLIVVFLCLAALYESWSVPFSVMLVVPLGVIGALFTTLRGLENDVYFKVGLLTTIGLSAKNAILIVEFAKDLMEKEGKGLV  
EATLDSVRMRLRPILMTSLAFMLGVIPLVLSNGAGSGAQNSVGTGVFGGMIAATSLAIYFVPIFFVIRRRFAKKNEDLEHP  
NYPHQTK

>AcrBF2\_P\_mirabilis

MSRFFINRPILSWVMAIVIMIAGGLSLIKLPVSQYPEIAAPAIMITAVYPGASAETVQDTPVQVIEQELSGLDGFRYLSSNSN  
TDGSFEVIATFEQGTDSIALMQVQNKQLATPKLPLEVQRQGMRVVKFQINFMQVVALVDESGKLDAFDLGNYLASH  
MKDPISRIDGMGDILLGSPRAMRIWLDPKLTNYHLMPPQDIAAAIQDENVQVSAGQLAGLPALKGVELNATITSASRM  
VSVDEFNHILLKVNLDGSQVLLQDVAKVEVGADNFSISSLYNGKPSAGMAMRLAPGANLLDVSKKVEVVEAQSQFFPQ  
GVKALFPYDTPSPVKSISVVRTIVEASILVFLVMFLQNIIRATLVPTLAIPVLLGTFGVLAALGLTINVLTMYAMVLAIGLL  
VDDAIVVENVERIMHEQASVKEATILSMTQIQGALVGIGLVLSAVFVPMFAFFGGSAGIIRQFAATIVVAMALSVLIALTF  
TPALCASILKKPQPKVKRRGFFWLFNRFFDRGTNYEYKGVNLYRRGRYMFIFLIITVGTGWLFTQLPKAFLPNEDQGVV  
MIEVRMPANSTAERMEQTMAEFRDYLLTEEKHLVKTVFTVNGFNFAGRGQNAGMAFVNLADWSEKKGKGEDVFSVA  
RAQQHFNSIRDGMVIAFPPPAIMEMGNAMGDFYLDNAGLGHTLVKARDKFELEAAQSPVLTNVRPNGKNDEPQL  
RVVIDKERARALQRLSDINDTLSAAWGS MYVNDFIDEGRVKRVYLQGEASARMLPTDLDKWHVRNQRGEMIPFNAFA  
TTQWYMGPPKLERFNGLSAIEILGEPAPGYSTGDAMLAIADIMKQLPSEISLSYSGLSYEEIQTQDQAPALYVMTILFVFLSL  
AALYESWSVPFSVALVVPFGILGAVIATLLRGLSSDVYFQIGLMTTIGLSAKNAILIVEFAKHLYEKDGKPLIDAAAEAARMRL  
RPIIMTSLAFTFGVLPMALAAGAGQGSQHSVATGVIGGMLASTFLAIFVPLFYFVVKLFSRKKAHVSIEEIDK

>MexIW\_P\_mirabilis

MKFTDIFVRRPVLALVVSTLIFLLGAFAFSKLPYRQYPMQLQNSTITIATDYPGASSELMQGFVTQPITQAVSSVEGVDISSSS  
VQGKSFVTRMELNRDPTQALTQVMAKVNQVRYKLPEQAYDPVIELSSGESTAVAYVGSSEQISIPELTDYLSRVVEPMF  
SSINGVAKVQVFGGQQLAMRVWLDTDKLAGRNLTASDVADAIRRNQYQAPGKVEGEFVIANVYVNTDLTNVEEFKD  
MVIHNDGHNLRDLDIGTVELGAAATETSGIMNGKKAFLGLFPTPTGNPLIIVDGIRENLTDIEKTLPPGVNVELAFETSRI  
KASIDQVVQTLIEAILIVIAVYLCGLSLRSVPIPVLAIPLSMLGAAGLMLAFGFSINLLTLLAMVLAIGLVDDAIVVENVHRH  
IEEGLSPVQAALVGAREVAGPVIAMTITLAAVYAPIGLMSGLTGALFKEFAITLAGSVIVSGIVALTLSPVMSSMLPKPENEG  
RMAKIAEYTFDKLAYYSYLLNFSLTHRWLTVVFAFAVFSVLPFLYSQTKQELAPLEDQASVLTAVKAPQHANLAYAEHFN  
QKLDDIYMSLPETDSTWIINGTDGPSASFSGGINFDGWKGRDRNANQIQADLQNRVADVEGSSIFAFQLASLPGSVGGP  
VQMVLRSPGLGYPVLFDTMEEIKQQAESGLFVVVDSDLDYNNPVVQITIDRAKANTLGIRMQDIGESLSLLVGEHYINRFG  
MDGRSYDVIPQSIQQLTPAALAGHYIRTQDNLLIPLSTVVNITTQVEPNKLTQFNQQNAAIFQAIPAGVTMGQAVAF  
LENVANSPLAGFSHDWQSDARQFTQEGNTLVFAFIAALIIYLVAAQYESLVDPLIILITVPLSICGALVPLALGMVTLNIYT  
QIGLVTLIGLISKHGLMVEFANELQVHKNLNRREAIIIEAAKIRLPRVLMTTAAMVIGLIPLLFASGAGANSRYGLGLIIVSGML  
VGTLFTLVLPMTMYSFLARNHQVSAQTERQKQLQQISEQ

>MtrD\_N\_gonorrhoeae

MAKFFIDRPIFAFWVISIFIIAAGIFGIKSLPVSQYPSVAAPTITLHAIYPGASAQVMEGSVLSVIERNMNGVEGLDYMSTSADS  
SGSGSVSLTFTPDTDENLAQVEVQNKLSEVLRTPATVQQYGVTVSKARSNFLMIVMLSSDVQSTEEMNDYAQRNVVPE  
LQRIEGVGQVRLFGAQRAMRIWVDPKKLQNYNLSFADVGSALSAQNIQISAGSIGSLPAVRGQTVTATVTAQGQLGTAE  
EFGNVILRANTDGSNIYLDVAKVGLGMEDYSSSTRLNGVNTTGMAVMLSNSGNAMATAKAVKERLAVLEKYFPQGMS  
WKTPYDTSKFVEISIEKVIHTLIEAMVLVFFVVMYFLQNIIRYTLIPTIVVPISSLGGFAFISYMGMSINVLTMFAMILVIGIVDD  
AIVVENVERIMAGEGLPPKEATKKAMGQISGAVIGITAVLISVFPVPLAMFSGAAGNIYKQFALTMASSIAFSAFLALTTPA  
LCATMLKTIPKGHHEEKKGFFGWFNKKFDSWTHGYEGRVAKVLRKTRMMVVIYGLAVVGVLFMRLPTSFLPTEDQGFV  
MVSQVLPAGATKERTDATLAQVTQLAKSIPEIENIITVSGFSFGSGQNMAMGFAIFKDWNERASGSDAVAVAGKLTG  
MMMGTLDKGFGIAVVPPIELGNGSGLSINLQDRNNTGHTGIAGEGNELIQKMRASGLFDPSTVRAGGLEDSPQLKIDI  
NRAAAAAQGISFADIRALASALSSSYSDFPNQGRQLQRMVQADEARMQPADILNLTVPNKGAVPLSTIATVSWE  
NGTEQSVRFNGYPSMKLSASPATGVSTGQAMEAVQKMDVDELGGGYSFEWGGQSSEEAKGGSQTLILYGLAVAAVFLVL

AALYESWSIPLAVILVIPLGLIGAAAAGVTGRNLFEGLLGSVPSFANDIYFQVGFVTVMGLSAKNAILIIEFAKDLQAQGKSAV  
EAALEAARLRFRPIIMTSFAFILGVVPLYIAAGASSASQRAIGTTFWGMMLVGTLLSVFLVPLFYVVVRKFFKETAHEHEMAV  
RHASKAGITGSDDKQY

>MexB\_X\_campestris

MARFFIDRPIFAWVLAIIVMLAGILSIATLPIAQYPSIAPPAVAITANYPGASAQTLTDTVTQVIEQKMKGDLNLSYMASTSE  
SSGAVTITLTFENGTDPDQAQVQVQNKLSLATALLPQEVQQQGVTVTKSATNFLNVLAFTSEDGSMSSDLSDYVAANV  
QETISRVQGVGDTTLFGSQYSMRIWLDPKLNNFNLTVPDVRAAIQAQNAQVSAGQLGALPAVANQQLNATITAQTRL  
KTAEEFENILLRTRTDGSQVRLRDVARELGSESYNTVGRYNGKPAAGLAIKLATGANALDTVRAIDKSLEEQEKFFPPGMK  
VQKPYDTPFVRISIEQVVHTLVEAVVLVFLVMYFLQNFRATLIPTIAVPVLLGTFGVLAVFGFTINTLTMFAMVLAIGLLV  
DDAIVVVENVERVMAEEQLSPKEATRKSMDQITGALVGVALVLAAVFVPMAFFGGSTGVYIRQFSITIVSAMTSLVLVAM  
VLTALCATLLKPGHGMATTGFFGWFNRFVDRSNGRYQGVRHMLGKGWRYMIAYVVIVALVVVGFMKTPVGFLPDE  
DQGTFLVLVQLPPGATDARTGAVLKQVEHHFLVDQKDSVAGIFAVSGFSFAGTGQNVGFVFKLRPWDERTGKGQSVT  
DVAAKAGAFFATLRDAQVFAVAPPVSELGNATGFDLMLQDRANLGHAAALMQARNQLLAELSQDKRLVAVRPNGQE  
DTPEFKLEIDPHKAEAMGVSIADINNTFSSAWGSTYVNDFIDKGRVKKVMLQADAPYRMNPQDIDRWVFRNSAGTMVP  
FNAFATARWTQGSPLRLERYNSLPSVEILGMALPGAASSGQAMQIVEAAAAKLPAIGFEWTGLSRQEKASTGQTGLLYG  
LSILIVFLCLAALYESWSIPFSVILVVPLGVFGTLVAAVLTWKMNDVYFQVGLLTTIGLASKNAILIVEFAKELHEGGKSLVAAA  
LEAARMRLRPILMTSLAFILGVVPLVLTSGAGAGAQHALGTAVIGGMISSGTVLAIFFVPLFFVLVRGLFERRAQPDASVPQH  
AGH

>MexDY\_X\_campestris

MPKFFIEHPVFAWVVAILISLAGVISILNLGIESYPTIAPPQVTVTANFPGASADTAEKAVTQVIEQQLTGIDHLLYFNSSSAS  
NGRVTITLTFETGTDADIAQVQVQNKVSLATPRLPSEVTQQGVVAKANAGFLMVAALRSDNPSIDRDALNDIVGSRVL  
EQISRVPGVGSTNQFGAEYAMNIWLNPEKLQGYNLSATQVLTAVRNQNVQFAAGSVGADPTPQGISFTATVSAEGRFS  
SPQEFENIILRTDNNGATVRLKDVARVTVGPSNYGFDQYNGKPTGAFGIQLLPGANALNVSEAVGAKLDELQPTFPQG  
VTWFAPYESTTFVRISIEEVVHTLVEAIVLVFLVMLLFLQNFRATVIPTLVIPVALLGTFFGMYVIGFTINQLTLFAMVLAIGIVV  
DDAIVVIENVERIMSEEHLEPKAATQKAMTQITGAVVAITVVLAAVFIPSAMQPGASGAIYKQFALTIAMAMAFSAFLALSF  
TPALCAAFLKSTHSDKKNWIYRTFDKYYDKLAHRYVGVVGNLTKRSPAWMVVVFVVLVLCGFLFTRMPGSFLPEEDQGF  
AVAIVQLPPGATKIRTNEAFAQMRVLEKQPAVEGMLQIAGFSFLGSGENVGMGFIRLKPWEERDVTAEQLIQQLNGAF  
YGIKGAQIFVVNLPTVQGLGQFGGDFMWLQDRSGAGQEALTQARNIVLGKAAQKQDQTVVGVVRPNGLNSPQLQLHV  
DRVQAQSMGLEVSDIYSSIQLMLAPVYVNDYFSEGRIKRVNIRADDQFRTGPESLRNFFTPSSTATGADGQPGMIPLSNV  
VKAEWTYASPALNRYNGYSAVNIVGNPAPGGSSGQAMQAMEEIVNNDLPPGFGFDWGSMSYQEIAGNAATLLLSV  
VVVFLCLAALYESWSIPVAVLLVPIGVLAGITFSMLRGLPNLDLYFKIGMITVIGLAAKNAILIVEFAVEQRAAGKTLREATLEA  
AHLRFRPILMTSFAFILGVPLAISTGAGANSRHSIGTGVIGGMVFATVLGVIFPLFFVVRRMLGDKLDEPPKEYLAVQND  
SGTHRPDR

>MexFQ\_X\_campestris

MDFSRFFIDRPIFAAVLSIIIFAAGLIAMPLLPISYEPEVPPSVQVRVYPGANPKVIAETVATPLEEAINGVENMMYMKSV  
GSDGVLVVTFTFKPGTDPDQAQVQVQNRVSQAQARLPEDVRRQGVTTQKQSPTLTMVVHLTSPKGYDSLYSNYAT  
LKVKDELSRLPGVGQIQIFGAGDYAMRIWLDPKVAARGLTASDVVAAIREQNVQVSAGQLGAEPMPNKSEFLLSINAQ  
GRLTTEEEFGNIVIRSGTSGEIVRLSDVARLELGAGKYTLRSQLDSKSAVGMGVFQSPGANAIELSDAVRAKMAELEKQFPQ  
DMAWSAAYDPTIFVRDSIAKAVVSTLLEAVLLVVLVILFLQTVRASIIPLLAVPVSVVGTFAALYVLGFSINTLTLFGLVLAIGI  
VVDDAIVVVENVERNIEEGLSPLAAAHQAMREVSGPIIAIALVLCVAVFVPMFLSGVTGQFYKQFAVTIAISTVISAINSLTSL  
PALAAMLLKAHDAPKDGPTRLIDRLFGWIFRPFNRFFNTSSHKYQGAVSRALGKGRMVFMVYLLLVGTGVMFKLVPGG  
FIPTQDKLYLIAGAKLPEGASLERTSEVISQISDIALQTEGVAHAVAFAFGLNPLQFTNTPTNTGTFLTLPFSERSRTAAQINA  
EINARISQIEKGFAFAFMPPPIGLGQSGSYLIQDRAGLGYGQLQTAVTAMSGAISQTPGMQFPIGTQYQANVPQLDAK  
VDRDKAKAQGVPLTNVFDTLQTYLGSAYINDFNRFGRTYQVIAQADGQFRDSVEDIANLRTRNDRGQMVPISGMVTLG

QTYGDPVIRYNGYPAADLIGeadTRVLSSAQAMQTLAGMAPKVLPNGMNIEWTDLSYQQSIQGNsALIVFPMavLLA  
FLVLAALYESWTLPLAVILIVPMTLLSALFGVWLTGGDNNVFVQVGLVVLmGLACKNAILIVEFARELEMHGKGIVEAALEA  
CRLRLRPIVMTSIAFIAGTVPLVFGHGAGAEVRSVTGITVFAGMLGVTFLGLFLTPVFYVALRKWVTRGEPAAAPAavaHDP  
VKA

>MexB\_T\_turnerae

MARFFIDRPVFAWVIAIVIMLAGVLAIVQLPVAQYPEVAPPSVSIRASYPGASAKVVEDSVVQIIEQNLTGVDNMQYMSST  
SDSSGTAEVTLTFVAGTDPDIAQVQVQNKLQAAMPLLPNEVQQQGIRVTKSTAGFLMVLGFVSEDGSLDKYDISDFIAA  
NVREPLSRVNGVGTIQLFGSQYAMRIWLD AHKMAAYDFTTVDVVNIRAQNAQIAAGELGGAPALPGQDINASIVVQT  
RLNNAQQFSNILLRVNPDGSQITLGDVARVEMGAENYQFETEYNNQAATGLAVTLASGANALETADAVMARIEDLKPF  
PHGLTVVKAFDTPPFVKLSIEGVVHTLIEAIVLVFLVMYFLQNFRATLIPTIAVPVVLMTGTFATLLAFGFSVNTLTMFAMVLA  
IGLLVDDAIVVVVENVERVMHEDNLGPREATRKSMsQITGALIGIALVLSAVFIPMAFFGGSTGIIRQFSITIVSAMLSSVVVA  
LTLTALCASMLRKSDVDHYARRGFFGWFNRFDSsSDGYQRGVGYMLARKGRFMVVYLIVIGALALLFGRLPGSFLPDE  
DQGIMFTQMSLPVGSTKERSMAVMDKVESYFLEQEKANVESVFSVIGFSFSGRGQNNGIAFVKMRDWSERTGAGQDV  
QSIAGRAMGYFMQMREAMVFPFVPPAITQLGTSSGFNLQLKDLSAQGHDAALMAARNQLLGMAAQDSRLARVRPNGQ  
EDMPQFKLDVDTARAAALGVSDQINAVFSTAWAAsYVNDFIDNGRVKRVYVQGDTPYRMNPDDVGDWYVRNDKG  
EMVSFSAFASGRWIYGSPrLERYNGISSVNIQGGAGPVSSGEAMAIMEELAAKLPFGFYEWtgMSLQERQSGDQAP  
MLYALSILVVFLCLAALYESWSVPIAVMMMVPLGVIGALLFAMLRGMSNDVYFQVGLLTTIGLSAKNAILIVEFARAIYEEK  
KSLIEATMEAVRMRLRPIIMTSLAFGLGVLPVLIASGAGSGSQNAIGTGvFGGVLSATALAIFFPVFFVVFQLSHRFGNKT  
AESsDKPAETQST

>MexDYB\_T\_turnerae

MIARIFVQRPVLAGVFAIALMLLGGIALRFLPVsQYPNISPPMVLVEAVYPGASAKVVENSvtQILEQSLKGLDGLLYFDSVS  
TSDGVVELTLVFDLNTDVEAqVRVQNKVNQISYRLPAQVQQRGITVNSLQNSFLMVAVFHDASGRLSsDIANWISS  
MEDPLSRLPGVGAIrNFgAPYAMRIWLDPhQLAAHQLMPSDVEEAIAQNTevPVGELGARPHREGQQLNVTVTAMS  
RLQSVDDFASIVLKTRAQGDVVRLGDVARIEIGRESYASTSRLNGKPASGLAMMMAPGANAMATASAVKNRIAQLRHTF  
PAGVDVFYPEDASRFVKRSIRDVLRtLAEALVLVVLVMYFLQNWRVTLIPTLTIPIVLLGTCCVIALLGYSLNTLNLfAMVLA  
IGLLVDDAIVVVEHVERTMMQEKLDARSATLKSMQHMTRVLIGIALVLAAVFLPMAAFPGSVGVYRQFSVTLVTAMALS  
AVVALTLTPALCAALLKPADGHKRNPVTRAFNRLFSVMKLRyHHRVTALLKRPLRFSaiYLVLLGSTWWAYQSLPTAFIPED  
DQGTVMVRYALPEGAsYTRtRELVRTVENYFMQHEAKNIAGIYTVSGFSFSGSQNAGIGFVPLKDWSQRQGQENSAQ  
AIAARANRALADLVEGKVFAMVLPPIDGLGDTNGFEFWLQDVAGRGREALVADAWQLVNSLTNEPDIMFADADGGES  
SPNLNIHIDQQKASAMGLNLHTINQTLSTAWGGRYVNDfVYDGQLRKVFIQADAPFRSAPENINDWQVRNNLGEMVP  
FSAFTAQQWESGPGQISRFNGLPAVRITGAAAPGASSGRIMERIETLAATLPGTNYEWSGLSYQDKISSGSATLLYTVSILFV  
FLCLAALYESWSIPLAILLVIPLGVLGAVVLVMLSGQSNdIFFQIGVLTsIGLSARNGILIVEFAEHAIQRGGSAFHATRKAASL  
RLRPILMTSLSFGAGVVPLIVATGPAANAQHAIGLAVLGGVITATLLTIFYVPLAYLAICRIRGWLSSSTQPINPVASEGVPL

>MexFQ\_T\_turnerae

MNISRFVDRPIFAGVISLLIFISGLLAVFQLPISEYPEVAPPSVVVNAsFPGANPKVIAETVARPLEEQMSGVENMIYMFSQA  
TTDGQMMLTVTFKIGTDPDLAQQMvQNRVSQALPRLPEVTRQVGVTVKSSPNLTMVVHLTSPDQRYDDLFLRNYAVL  
SVKDELAKLTGvGMVRLFGSGDYAMRIWLNPDKIAEYNLTSTDVVNAIREQNVQVAAGIIGGAPVSSAIEVQMPINAKGR  
LETPEEFGSIIKAGQHGEITRLRDVARIELGASDFGLNALLDNKPAVAIPiFQAPGANAIQISDQVRATMKRLSEDFPAGMS  
YELVYDPTVFVRGSIEAVVHTLFEALLVVIVVVVFLQTwRASIIPLAVPVsIVGTfALMHVFGFSINTLSLFGVLVSIGIVDD  
AIVVVVENVERNIEEGLHPIQATYKAMQEVSGPIIAISLTVAVFVPIAFVSGLTGQFYKQFALTIAISTVISAVNSLTSPALSAL  
LLKDRDAPKDLLTRGMEKVFgPFFRGFNrVFGASSNGYGRSVQHLLGRKTIMMAIYAGFLAITCWEFISIPKGFVPPQDKQ  
YLIAFAILPDGATLERTRQVIEDMGAIGLEEEGVANAVQFPGLSINGFVNSSSAGIVFFPLTDfDERTDSSQSAAAIAQRLQ  
QKFGAIDEAFIAIFPPPPVRGLGTTGGFKLQIEDRAGLGYEALADVVAQASQKAMQRPELSRVYSNYKINVPQLYADLDRt

KAKQLGLDLREIFETMQIYLGSLYINDFNQFGRTYRVIAQADAQYRESIDDALNLKVRNRDGDMMVPLGSVVHISDSYGPES  
ATHYNGYLAADLNGDAAPGYSSGQAQDAISEILDEVLPPIISYEWTDLTYYQQVLSGNTAIFIFPLCLILVFLVLAQAQYESVV  
LPLAVILVPLSILAALAGVFISGGDNNVFTQVSLFVLAGLACKNAILIVEFARELEMEGMPTLKAAITASRLRLRPILMTSFAF  
IMGVPMVFSTGAGAEMRVVMGIAVFSGMLGVTAFLFFTPIFYVLLRTLLEKKFQKSPAEPKPTTTQAEAI

>MexIW\_T\_turnerae

MKTVFTDIFVRRPVLAIVVNLVIIIAGIQAISSLTVRQYPRNDNAVITVNTAYIGANAQLVRGFITTPLEAISGADGIDYINSS  
STQGMSTINVQLELNYDPIKALSEITSKVNQVRGDLPEAEVPIINVQSADSQFASAYLSFSSEILEPNQITDYLTRVVQPRL  
AALEGVQRADVLGGRTFAMRIWLKPDRMAAYGITPVQIRQALTSNNYLAALGNTKGSFIQVNLSTANTDLNTVEEFRDLV  
LRSENGALVRLSDVADVELGSESYNEEVRYSGMTTTFMGIWPMMPNANTLDVMKLVKELDSLDRDGMPPKGMDAVIGYDA  
TEYIESSIHEVIKLTSETLLIVIAIIFLFLGSVRSVVIPVMAIPVSLIGAIFLMQLFGFSLNLLTLLAIVLSVGLVVDADAIVIVENVERHI  
SEGQSPMKAAMLGARELVGPVIAMTITLIAVYLPIGLQGGTLGSLFREFAFTLAGAVTISGIVALTSPMMSSKLLKEGIEDEG  
FAKRSASAFNAIRARYLRILDVSLRARGAIYVLWFLLSAGALAMFMSSPKELAPTEDQGIVFIMSEGASSSTIDQSKIYANAL  
NEKLLSVPEGEFTFQITFPDGGMGGLLLKPAERDRSVFQLLPEITADISQIGGINNFAIAPPALPGGGSFPVEFVIAATGETE  
DILKYAEQLQQAATSGMFMFPPIQIDTKVDVPEAELVIDRDKVADLGLSLQQVGADVGVMGGLGGYVNRFNIGGRSYRVI  
PQVKRSERLNPAQLQDIFITGPEGKLIPLSTVARIEEKTVPRLNRFQQLNAVKLSGVSTQSLDAALNFELEAAKILPSDYM  
VDYTGESRQLRREGNKVFPAFTMALLLIFLVLAQAQFNSFRDPFVILAGSVPLAMFGASIFTFLKFPVPGMGFWTDGFTTTLN  
IYSQVGLVTLIGLVAKNGILLVEFANKMQELGLTKMAAVREAASRLRPILMTTVATVAGHFPLTLVTGAGAEARNSIGLVL  
VGGMAIGTIFTLFVPSIYVLLAKNLHGELEEVPPEEPEPMDPITV

>AcrBF\_P\_haloplanktis

MSRYFIDKPIFAWVLAIVMLAGILAVKSLPIAQYPSIAPPAISITANYPGASAQTLEDSVTQVIEQKMKGLDGLLYMSSTSES  
NGSATLTLTFNADTDPDIAQVQVQNKLATATPLPEEVQRQGVVAKAARNFLLVLAFAVSKDGSMNTIDIGDYVASNVQ  
DIVSRVDGVGAEQLFGSQYAMRIWLDPAKLQNFKLTPNDIGAAITAQNAQVSAGQLGGMPAIAAGQQLNATITAQSRLQ  
TPEQFENILVKTNSDGSVVRKDVARELVGGENYGVVARYNGDPAAGIGIKLASGANALDTAEGVKKALEDLKPFPEGLD  
VAIPYDTPFVLSIEKVVHTLIEAVILVFVVMYLFQNFRTLIPTIAPVPVLLGTFAILYTFGYSINTLTMFAMVLAIGLLVDD  
AIVVVENVERLMTTEKLSALDATRKSMDIEKALVGIAMVLSAVFIPMAFFSGSTGVYRQFSITIVSAMGLSVLVALILTPAL  
CATLLKPSHVHDKTSFIGRFFSGFNRGFDKTNRGAQGIVGRMISQSKRYLLIYGVLVGGMVYVFSSLPTAFLPDEDQGILFN  
QVMLPAGSTIEQTLGVVEKVENHYLNDQAEAVGSIFTVTGFSFAGSGQNSAIGFVNKLHWDERQRDDLSVNAVAGKG  
MGYFSTIKEAFVFAFPPPAIVELGTANGFNMFLQDRVGLGHDELLNARNMMLGMASKSPVLAGVRPNQGQEDMPQLQDI  
DLAKAEALGVTQTDINSTLSTAWGSRYVNDFIDRGRVKKVYMQGEADSRMPEDLNKWWYVRNNNGDMVPFAAFASS  
HWSYGSPRRLERYNGFSAMEIQGSAAPGYSTGQAMDEMERLVKQLPNIGIASEWSGISYQERSSGGQAPLLYGLSLLFVFL  
CLAALYESWSVPFAVMIIVPLGIFGAIMAALIGNLSNDIYLQVGLLTTIGLASKNAILIVEFAIHKMEEGLSLVDAAIAAVKLRL  
RPVLMTSLAFICGVVPLAIASSAGSGAQNALGISIIGGTAASTLVVLFVPLFFVLVRKTFSSKSAVATKESE

>MexFQ\_P\_haloplanktis

MKFSHFFIQRPIFAAMLSLIIAGGISLFQLPVSEYEVVPPTVVVTASYPGANPTVIAQTVATPLEQEINGTENMLYMFSQA  
TSDGRMTLTVTFALGTDLDRAQVQVQNRVNSALPRLPQEVQRLGVVAEKSSPDLTMVVHLYSPENTHDTAYLSNYADL  
NIKDEIARLSGVGDIRLFGGGKYSMRVWLNPDALASRELTASDVVSALRSQNQQVAAGSLGAQPISNDSQFQILLNVKG  
RLNSIEEFQVVIKVGEGGQLTRLSDIARVDLGQDTYALRAELDNQPALAMPIFQRPGSNAIELSDQVRETMARLAKDFPT  
GVEYDIVYDPTVFVRGSIDAVITTLLEAIALVIVVIVFLQTWRAIIPLIAPVPSLIGTFAVMQLLGVSTINTLSLFLGLVLAIGIVV  
DDAIVVVENVERNIEKGLSPLEATRVAMSEVTGPPIAIALVLSAVFIPTAFITGLSGQFYKQFALTITISTIISAFNSLTSPALAAAL  
LLKPHDAKPDATFRLNLKLFGRWLFAPFNRFNRGAKGYEKLVLQKLIRMSVVVMVAYVALVGGTIKLFDSVPGGFIPQQD  
KQYLVAIAQLPDAASLDRTAEVIKQMQQIALEVPGVAHTVAFPGLSVNGFTNSPNSGIVFTPLAPFSERTDPSLSAMAIAA  
QLNQRFAAIDEAFVAVFPPPIQGLGTTGGFKLQIEDRANKGFEALFNSLQAVIAKAQQDPALVGLYSSFRIQVPQMDIDI  
DREQALIQIGPLDEVFNALQIYLGSVYVNDFNLFGRTYQVNAQADTDYRVDPEQILHLKVRNRAGNMVPLGSVLTVTPTI  
GPDRVMHYNGYPSAELNGSPAPGYSSDQAQVAIEKVLADTLPSGIEYEWTEVTYQQVLAGNTMVYVFLVLLVFMVLA



AQYESLRLPLAIIMIVPMTIFSALIGVWVFGSDNNIFTQIALIVLVALASKNAILMVEFAKDQHETGLSHLDAMLAACRMRL  
RPILMTSIAFTAGVVPLVLATGAGAEMRHAMGNVAVFAGMIGVTVFGLLFTPVFYMLVANKKQKAQQVSHD

>AcrBF\_H\_defensa

MANFFIERPIFAWWIALIVMFLGALAITKLPVAQYPAVAPPTILIVANYPGADATTVQNTVTQVIEQNMNSIDNLLYMSSNS  
DSSGNANITLTFNLGTDPDIAQVQVQNKLRVMPALPQEVQKQGIVIVEKSTGNFLMFLAFISENGSMKQEEIADYVASH  
LKDPLSRINGVGDVQLFGAQHAMRIWLDPYKLNDFKLTPLDVMNAIQAENNQVAAGELGSAPTIGQQNLASIVAQTR  
LTSKEFSQILLKANPDGSQVRLKDVANVELGAEGYKLNLTLYNGKPATGVGIKATGANALEASNALKEELIKLEPSFPAGF  
KVVHPYDTPFIKISIQEVIKTLLEAIVLVFLVMYFLQNFRTLIPTIAVPVLLGTFGVLSVLGYSINTLTMFGMVLAIGLLVD  
DAIVVVENVERVMHEDGLSPKEASKSMQIQGALVGIALVLSSVFIPMAFLGGSTGEIYRQFSVTIVSAMVLSVLVALILT  
PALCATILKPIDKDKKNKVSFAFLGWFNHFIEKSSCHHYTYSVKHILKGTGRYLIYLFIVIGMCVLFRLPTSFLPEEDQGVFVTM  
VQLPVGASQERTDKVLSQVTDYFLTQEKDVIKSVLTLSGFGFNGQGQNMGLVFISLNDWSQRTEKKDTSVAVVARASRA  
FSQIRDGLVFAFNLPITELGVATGDFDFELLDQRNLGHQKLTQARNQLLAMAAQHRDVLVNMRRPSGMEDSPQFKIEVDK  
EKARVLGLSLSDINTTLGSAFAGIYVND FIDAGRKKVVFVQGAAPFRMLPEDINHWYVRNKQGQMVPFSSFTTQWKYN  
SPRLERYNGFSPMKIQGQAAPGKSTGEAMALMQELAKKLPNGIGYDWTGVSFQERMSANQSLFLYLAISLIFVFLCLAALY  
ESWSIPFSVIMVVPVGVGLSLLAAYLGGLDNDVYFQVSLTTIGLSAKNAILIEFSKNLIQKEGKGLIEATLSAVRMRLRPILM  
TSLAFMLGVPLAMSHGAGSGAQHALGVGVIGGMIASVLAIFYVPVFFVFLRRFGQKTHLGIQHSDKN

>MexB\_S\_maltophilia

MARFFIDRPIFAWWIAIIIMLAGGLALFKLPVSMYPNVAPPAVEISATYPGASAKVVEDSVTQIIEQNMKGLDGLIYFSSNSSS  
NGQATITLTFESGTNPDIQVQVQNKQLQAMPLLPQEVQRQGINVAKSSSGFLNVIAFVSENGSMDANDIADYVGSNV  
VDRLSRVPGVGNIQVFGGKYAMRIWLDPNKLHTYGLSVAEVTAAIKAQNAQVAIGQLGGAPSIGQQNLATINAQSR  
QTPEQFRNIIVRGAQDGAELRLGDVARVELGAESYDFVTRYNGQPASGLAVLATGANALDTAAGVNAALEDMSFFPA  
GLKAEVPYDTPFVRVSIKGVVQTLIEAIVLVFVVMYFLQNFRTLIPTIAVPVLLGTFGVLAMLGFSVNMLTMFAMVLAI  
GLLVDDAIVVVENVERIMSEEGLSPLEATRKSMGQITGALVGIGLVLSAVFVPMFMSGSTGVIYRQFSATIVSAMALSVLV  
AIVLTPALCATMLKPLKKGEHHVAHRGLAGRFFNGFNRGFDRTSESYQRGVIRGIIHRPWRFMGIVAALFVLMGVLFVRLP  
SSFLPNEDQGVLMALVQAPVGATQERTLESIAALENHFLQNEKDAVDSVFSVQGFSFAGMGQNAGMAFVKLKDWSER  
DANNGVMPITGRAMAALGQIKDAFIFAPPPAIPELGTASGYTFFLKDNSGQGHEALVAARNQLLGLAAGSKKLANVRP  
NGQEDTPQFRIDIDAAKATSLGLSIDQINGTLAAAWGSSYIDDFVDRGRVVRVQADQPFMVPEDFDLWSVKNDKG  
EMVPFSAFATKHWYDGSPLRLERYNGVSAMEIQGEPAGVASGDAMAEIEQLAKQLPAGFGIEWTAMSYQERQAGSQ  
PLLYTSLMIVFLCLAAMYESWSVPTAVLLAAPLGILGAVLANTFKGLERDIYFQVAMLTTVGLTSKNAILIVEFAKENLEKGA  
GLIESIMHAVRDLRPIVMTSLAFGMGVVPLAISTGAGSGAKQAIGTVGLGGMIVGTVLGVFFVPLFFVVVQRFVFRKSTT

>AcrDMexB\_S\_maltophilia

MVRFFIDRPIFAWWIAIAVSLLGLLAILLPVDRYPQIAPPTITIRATYTGASSQTVENAVTQVIEQSQQSLDHLMYMTSTSAS  
DGSAQVNLVFATGTNPDTAQVQVQNLQAAMATLPQAVQQNGLTITKSSGSIFEVLSTSEDGSMDNFDVANFMEAR  
IDDQISRVSQVGNIQPIGQEYAMRIWLDPEKMRQYALMPSDIETALQAQNTDVSAGELGGQPALKGQQLDATVTARSR  
LHTPEQFAQVVLKADANGSVVRLGDVATIGLGPESYDSISTFNGKPSASLGIELNAGANAIASKAIDARLQQLQKYWPH  
GYTAHVAFSTTPFVTISLKEVVITLIEAIIILVVLVMYFLQNWRTLIPTIAVPVLLGTFGVLAAGFYINTLTMFALVLAIGLL  
VDDAIVVVENVERVMTFEG LAPKATLKAMGQITGALVGIVLVLTAFLPMAFFSGVTGVIYRQFSVTIAAAMILSVLVAM  
TITPALCGSILHQIPKGGHPHGDHGGEPSSLGKFFIWFNHRFERTSNGLRHRVDRFLGRRTLGVLFYLVLSVATGLLLWHLP  
GAFLPDEDQGMLNALVKLPAGSTLEQTRAVMDRLSAVAVKDDGVLSIQATAGFSVTGSGQNVGQAFIRLKDWDDEK  
DADTIAARLTRAMASVPDAQVFITSPPAILGLGDAGGFTLELQDEGGAGHAAVAARNLTLLKEAKDPKLVNVRYASLED  
APVYAVKVDDAKAQAMGVNPQDVNDTLNAAALGGDFVNNFIYKGRIKKVFIQGTAEARMQPQDIERWSVRNQAGQM  
VPLSSLISTHWTSAPAALQRYNGISAMEITGQPAPGVSSGEAMAEIARLADTLPEGFSHAWSDMAYQEQLSGNQAPMLY  
AISLLFVFLCLAALYESWAVPFAVMLAVPVGVFGAVLMMNLRGLNNDVYFQVGLLTTIGLAAKNGILIVEFARILEQQGRD

TRDAILQAVYLRLRPVMTSLAFLMGVLPVLFATGAGSAARRSLGTGVAGGTVASMVLGMFFVPLFYLLVRRLLFPGRAPAD  
ATVPETSP

>MexDY\_S\_maltophilia

MPKFFIEHPVFAWVVAIISLSGVIAILNLGVESYPNIAPPQVTVSATYPGASADTTEKSVTQVIEQQLTGIDHLLYFSSSSSS  
NGRAQITLTFETGTDPDIAQVQVQNKVSLATPRLPSEVTQQGVVVAKANAGFLMVVALQSDTPTINRDALNDIVGSRVL  
DQVSRIPGVGSTQQFGSEYAMNIWLNPEKMQGYGLSASQVLA AVRAQNVQFAAGALGSDPSPEGQHFTATVSAEGRF  
SSPQEFENIILRANADGSRVLLKDIARVAFGANNYGFDQYNGKPTGAFAIQLLPGANALNVAEAVRAKMDLQPSFPAG  
VTWFSPYDSTTFVKISIQEVVKTLFEAVFLVFLVMLIFLQNFRA TLIPTLVIPVALLGTFLGMWMIGFTINQLTLFAMVLAIGIV  
VDDAIVVIENVERIMTEEGLAPKPATQKAMTQITGAVVAITVVLA AVFIPSALQGGGAAGEIYKQFALTIAISMAFSAFLALGF  
TPALCATFLKPTHNDNPNIYVRTFNKYYDKISHTYVGHITS AVRHAPRWMLFVVLTALCGFLFTRMPGSFLPEEDQGYAL  
AIVQLPPGSTKGQTNEVFAQMRGILEKQDGYEGLQVAGFSFVGSGENVGMGFIRLKQWEERKFTAPEFIQNMNGAFY  
GIKEAQIFVNLPTVQGLGQFGGDMWLQDRSGAGYEQLTQARNILLGQAAQKPDHLVGVRPNGLNAPQLQLHVDR  
VQAQSMGMSVSDVYSTIQLMLAPVYVNDFFYEGRIKRVTMQADGPYRTGQESLSFYSPSSLTKNADGTNSMIPLNTVV  
KSEWVSAPPSLSRYNGYSAINIVGSQAPGTSSGEAMQTMESIVNDDLPAFGGYDWSGMSYQEILAGNAATLLLVLSIVVV  
FLCLAALYESWSIPVAVLLVPLGLVGLALGLSMLRGLPNDLFFKIGLITVIGLAAKNAILIVEFAVEQRAAGKNLRDatieaar  
LRFrpilMTSfAFIMGVIPMAISTGAGANSRHAIGTGvIGGMLFATLLGllMIPVFFVvVRRMLGDKLDEPSKEFMERQRDA  
DAAHRPDR

>AmrBAdeB\_S\_maltophilia

MARFFIDRPVFAWVLAIFILAGVLAIPRLAVERYPAVAPPSVSIYASYPGASPQTLNDAVVGLIERELSSVKHLLYFESSVDTS  
GEASITATFKPGTNPELAQVDVQNRKAIEPRLPRSVRQNGLFEAADSGFLMLVGLRSPDASVSEALGDFMARNIIEELR  
RIDGVGRVQLFGAEQAMRVWLDPTRLTGyGLTMGDVAAAIEQQNLEISPRIGDSPGVPGQRITVPLSADGQLSTPEQF  
AAIVLRAGADGSRVVLGDVARVELGAQSYAWGTREDGHPATAAGVQLRPGANAVRTASAVRERMAELAPLLPRGVESS  
IPFDTAPFVKISIQKVVQTLLEAMLLVFAVMYFLQNWRYTLIPALVAPIALLGTFAVMLALGFSINVLTMFGMVLAIGIIVDD  
AIVVVEGVERIMAEGLPPREATIKAMRELTGAVIGITLVLTAVFIPMALASGSVGAIYRQFTVAMAVSILFSALLALS LTPALC  
ATLLRPNTHGHHGRRGGLFGAFNRGFERMTGRYQRGVASVQLRSGRVMGVFAALVAALLLGLHWLPGAFLPEEDQGYF  
MTSIQLPAEATAERTLAVVEAYERHVASRPGIGSNQSILGYSFSGSGPSAALTYTMLKDWGERAGATAAGEVEAAQKAM  
ATIAEGEVMSVMPPAIDSLGRSSGFSLALQARTGQSQAELRAALQQLLKAEASPLLSEVHADGLPAGTSVRLLDIDRAKAE  
AMGVGFEQISSTLSAAMGSQYVNDFPNKGRLQQVILQADAPHRMELEDVLKLYVRNSEGGMVASELVTPHWTEAPLQ  
LQRYLGFPALNLSGAPASGVSTGQAMAEMERLAEKLPSGFALQWTSQSLSQERESGAQAPWLLLLSMLVFLVLAALYES  
WSIPLAVMLVPLGLLGAVA AVLLRGMPNDVFFKVGMITVIGLSAKNAILIVEFARQLQQQGRGLVEAALEAARLRLRPV  
MTSLAFALGVVPLMLAQGASKETQQAIGTGvFggmVSATVLAVFFVpVfyVVVQGARQWIAQRLRRRRRPMPEGSVDG  
TGHR

>MexFQ\_S\_maltophilia

MDFSRRFFIDRPIFA AVLSI VIFAAGLITIPILPISEYPEVPPSVVVRTVYPGANPKVIAETVATPLEEAINGVEGMMY LKSVAGS  
DGVLMQMTVTRPGTDPDAAAVKVQNRVAQAQARLPEDVRRQGVTTQKQSPTFLMVVHLTSPQGKYDTLYLRNYARLH  
VKDALARIPGVGDAQIFGGGDYAMRAWLDPDKVASRGLTASDVVRAMREQNVQVSAGQLGAELPDSKFLT LINAQG  
RLKTEKEFGDIVLKS GTDGEIVRLSDVARLELGAGDYTLRSQLDGKNAVIGIGIFQSPGANALEIRDQVISTMDEM QKTMPIA  
DVKYEA VYDTTIFVRDSIKAVVSTLLEAIALVVLVILFLQTWRASIIPIAVPVSVVGTFAALYLLGFSINTLSL FGLVLAIGIVV  
DDAIVVVENVERNIEEGLSPTAAAHQAMREVSGPIVAIALVLC AVFVPM AFLSGVTGQFYKQFAVTIAISTVISAINSLT LSP  
ALAARLLKAHGAPKDGPSRLIDRLFGWVFRPFNRRFFKSSEKEYERGVARILGRRGAVFVVYA ILLVGTGVIFKLVP PPGFIPTQ  
DKLYLIAGVKLPEGSSIARTDEMLRKVAKIAQETDGV AHTISFPGLNALQFTNTPNTGVAFIPLKPAERHGR TAAQINAEIN  
QKIAGLQEGFAFAMMPPIILGLNGNGYQMFIEDRGNLGYGALQNAVQAMQGTVAQTPGMAFPISSYQANVPQLDA  
EVD RVKAKAQGVQLTELFDTLQTYLGSAYVNDFNQFGRTWQVIAQADGPFRETVEDIGKLRTNRDRGEMVPIGSMVTIK  
QTFGDPVLRFN GYPAADLAGEADPRLSSAEAMTKLTEIAGKVL PVGMTTEWTDLSYQQATQGKA AFIVFPVAIMLAF L

VLAALYESWSLPLAVILIVPMTLLSALFGVWLTGGDNNVFVQVGLVVLMLGLACKNAILIVEFARELEMGGKGIVEAALEAC  
RLRLRPVMTSIAFIAGTVPLVLSHGAGAEVRSVTGITVFAGMLGVTLFGLFLTPVFYVALRKVTRNGGGQLVQHGEPTIH  
H

>AcrBF\_I\_loihiensis

MAKFFFINRPIFAWVIALLTMMAGAIAMLQLPIAQYPTIAPPAVEIQVSYPGANAETVSNTVTKVIEQNMTGIDNLLYFSSQS  
NFGNGTVSLTFASGTDPDIAQVQVQNKLSQATPQLPQAVQAQGITVSKASSSFLMVAALVASDDRYSTDLSDYIASNI  
QDPIARTTGVGNVQLFGSPYSMRIWVDPSALVNYGMTMADLKSIAQNAQVAAGELGGTPAVEGQRLNATIIAQTR  
MSDVSEFENITLKVLSGDSQVRLKDVAEVEKGAENYSIQANYNGKPATGLAINLQTGANALETADAVKARMAELEEFPD  
GMELVTAYDTPFIKISISEVAQVLIEAIIIVFLMFVFLQNLRLATLIPTLAIPVVILGTMGVMALAGFSINTLTMFGMVLSIGLL  
VDDAIVVVENVERLMSEEGLSPKQATIKSMGQITGALVAIGVVMMAAVFAPMAFFPGSTGAVYRQFSLTIITSMGLSVLVAI  
VFSPALCATLLKPVKHKDKSSGWGPLGWFNRTLEKWTDKYNTNIIHSILRRTVRFGLVYLGIIGILVFLFMKLPAAFLPDEDRGV  
FLTQMQLPVGSTIEQSVNTMDKIENYYLNQEDAVQSVFSVVGFSFSGRSQANGIAFVRLKDWSEDESQSVNAVIGRAF  
GFFAGIKEAMIFAFNLPPPELGVSSGFNLFLQDRGNLGHAGLLEARNQLLGMAGQNDKLVQVRPNGLEDAPQLRIDIDF  
EKAQALGLTITININETLSTAWGSSYVNDFIDRGRVKVYLQGETESRMLPEDINNEWYVKNQQDMVPFSSFSWSEWWTYG  
AQRVESYNGVAAMEIQQAAPGVSTGEAMIEMEKMIAKLPPIGFEWGTGSLQERQSGDFAPILYSVLIVVFLFLAALYES  
WSIPFSVMLVVPLGILGAVVAVMLRGISNDVYFQVGLLTTVGVSARNAILIVEFAKDLQAQKGELLDATLEAVRLRLRPILM  
TSLAFIFGVMPALSDGAGAASRNAIGTSVIGGMIGGTVLAIFFVPLFFYVVRRIFFPKQSEE

>AcrBF\_P\_arcticus

MSRFFFINRPIFAWVLAVLMLIGVISVLNLPQIEQYPRIAPPTISVSASYPGANAQTVENSIVQIIIEQRMKGLDGLMYMSSSSS  
SNGSASVTLTFENGTDSDTAQVQVQNKQLQAAMSSLPESVQRQGVNVNKSSSFMMVQAFISEDGNMDRSDIGDYINS  
NVLDAISRVEGVGEVQVFGSTYAMRVWLDPSRLRSYNMVPDSDVNAIRAQNTQVSAGQLGQAPADTDQQVINATVT  
VQSYLQTPEEFQNIILLKTDTAGAQVRLGDVADVEIGSENYSVVSLYNGQEAAGLGISLAAGANALETREAVGVRMAELEK  
NFPAGLTSVVPYDTPFVRLSIEQVVMTLIEAIVLVFIVMFLFLQNWRAIIPTLAVPVVLLGTFGVLYIAGFSINVLTMFAMV  
LSIGLLVDDAIVVVENVERILEEDPHISIKDATVQSMGEISKIVIGIALILSAVFIPMAFFGGSTGVIYRQFSITLITSMVLSAMVA  
LVFTPALCVTLTKRGKSHEKGENSENQKGFFGWFNRSFTKTSQSYEKFIGKSFRFKWLYLIVYAAIIGIMAVVFLRIPGSFLPEE  
DQGIMFTLVQLPAGSTLDETQDVLDKIRNYYDTQESDNIAVSFTIAGFSFAGQGQNMGLAFVRLSDWEERSGDENTAQA  
VAGRAMGYFFTQLNEAQVFAIVPPAITELGNASGFNLMLQDSGNLGHGDLLEARNMMLGMAAQNEQVAGVRPNGQE  
DSPQLKIDINQEQAAYGLSLSNINSVISTAWGSSYVNDFVDRGRIKRVYVQGEASSRTNPDDIGKWYVRNDMNDMISF  
DAFSSSEWQSGSPRLTRYNSLPSMNIQGSAAPLSTGEAMSSMEAMIDKLPEGISYEWGTGMSLEEKSGAQAPILYALSIL  
VVFLCLAALYESWSIPFSVLLVIPLGVLGAVIFTWLRGFANDIYLQVGLLTVVGLSAKNAILIEFAKERQEAGYSLTEAVMTA  
ARQRLRPIIMTSLAFLGVVPLFLANGPGSGSQNAIGTSVIGGVITATLLGIFFIPMFYIWWRSAPPHKYENNKPNDKDDSN  
GTPDSHNPMPSDNDQPASLGDNT

>MexDyB\_Marinomonas

MLAHFFINRPVFAWVISIAIMLAGLASILNLPISQYPNVAPPTISATYSGASAETVENSVTQILEQQLTGLDGLLYFSSSSSS  
SGRTSINVTFEQGTADIAQVQVQNKIQQITSNLPESVQRNGVTVRKSNSDFLMVAAIYDETDTDANDISDFLVSSVQD  
PVSRLVDGVSIGQVFGAEYAMRIWLDPLKLASYKLMPNSVSSAINAQNTQVAAGSLGAYPIIKGQELNVTVAQSKLQTAE  
QFRDIIILAYDDSGATVRLSDVAKVELGSESYGYIPRLNGHPASGMVAVMLAPGANALSTSEAVKKVLNGLSSTLPDGYKLSF  
PVDNTAFIRISIEEVKTLFEAIVLVVIMFIFLQNWRAIIPAVPVVLLGTFGVLEIFGFSINTLTMFGVVLSIGLLVDDAIVV  
VENVERVMEEDKLSPKEATIKSMKEITSALVGIAVVLSAVFLPMAFFSGSTGVIYRQFSITIVASMTLSVIVALTLTPALCATLL  
KANHGGNNKGLGGWFNRNFRATDKYFGSVSSIIKKPVRWMLGYGVIVAGLAGLMVTLPSGFLPTEDQGRVMVMVSL  
PEGAAMSRDVKMRDYESYFMNQEKDNVEDIFTISGFNFMGSGQNAGMAFVALKDWSKRVGPANSASAIVGRSYGAF  
AGIRDARIFSLIPPSIQGLGQSNGFTFQLQASGNTDRATLLEMRNALLQNANTSQLLTGVRLGSDSEAPQLHIDIDQEKAS  
ALGLSMSDISSTLSSAWAGSYINDFIDRGRVKTVYMQGEAQYRSSPEDLQHWYVRGNDNTMTPFSAFAKSEWYGPXSL  
TRFNGLASYEIQGSGAPGVSSGAAMDELQNIADALPGGVTGSWSGLSYQERLSSGQTQILYAISILVVFLCLAALYESWTV

PFSVILVIPLGVIGSAAAAHLRGLENDVYFQVALLTTIGLSSKNAILIVEFAEAAAYRRGLNVWDAAAQAARLRLRPIIMTSMA  
FMVGTLPALSSGAGANSRISIGSGIVGGTLTATVLAVFFVPLFFVWVRRIFFPKRPEALSSNENAE

>AmrBAdeB\_MexDYB\_Marinomonas

MSNFFIARPNFAWVMAIFILLAGLLALPTLPVSQFPVAPPQVEITATYPGASAQVLVDSVTSVIEEELNGAKGLLYFDSSS  
NANGIAQITASFEPGTDPDLAQVDIQNRLKKAEARLPSSVIAQGVQVDQASSGFLMIYALTFKGDDSSKSIHALADYAARNI  
NNNIRRVKGVGKLQYFGTEAMRVWVSPEKLLSYGLSIGDINNAINQNQVVPAGSFGGRPADDAQELTASLVVKGFL  
DPEEFGNIVLRSNVDGSAVYLKDVARVELGKQDYNFETRLNGHKAIMGAVQLSPGANAIETVKAIKARAAELEANFPDDI  
QISFPYDTSKFVSAAIEKVIYTLIEAIVLVFLVMLLFLQNLRYTLIPTIVPVCILGTFAVMSLMGFSVNMMTMFGMVLAIGILV  
DDAIVVVENVERIMVEEGLPPKDATIKAMGQVSGAIVGITLVLSAVFVPLAFMSGSGVGIYQQFSMSLAVSIMLSGILALTFT  
PALCATLLKPINKEAHHEKGFFGWFNRRKFARLTHRYSILNGMLVNRSGRFMLVYLVLIIGLGYAYLRLPESFVPTEDQGYM  
IVDLQLPAGATFSRTNETMKDAEKFLGQRDAVENVTVMGFSFGSMGANAGLLPFTFTDWSRQQLSDFDETAMAYNQF  
AGSITDGRSMAVEPPSIEGMGNSGGFSLRLQDRSNLREALTNARNIVLGQANASPIIAYAMMEGLEADPQLRINIDRQK  
ATALGVGFESINNAVSTAYGSASVNDFTNAGRLQRVVVQADVADRMTPERVLELQVLNDEGNLVPMRFSASSWEIGP  
VQVSRYNGYPTYKISGSPMPGHSSGEAMAEIERIISTLPKGIGYEWTGLSYQEKAAGSQAPMLLTISILVFLLLVALYESWSI  
PFSVILIPIGALGAVAAVYLMGMSNDVYFKVLITIGLSAKNAILIVEFAKDLYQQGHSLKESAIQAAKLRFRIIMTSMAFIL  
GVVPLTIATGAGAASQHS LGVSVIGGMISATVLGVLFVPVFFTWWLGRFKASNKT

>AmrBAdeB2\_MexDYB\_Marinomonas

MAQFFIHRPIFAWVLALFIILGGVLSIPQLPIARYPSIAPPSVSIMATYPGANPQTMNDVLSLIERELSGVKNMLYFESSAD  
GSGSASITVTFKPGTDPKLAQVDVQNKIKAVEARLPQAVRQNGLSVESATSSFLMIVGLKSDDGRTETSLSDYMSRNLLE  
EFRRIDGVGNVQLFGSEQAMRIWVDPNKLTSYGLTMADLTAITQQNTQIAPGSVGASPSVIGQRVTVPLTVQGQLSSP  
EEFASIVVRARTDGSKIVLSDVARVEIGAQS YGFSNRENGKVSTSAAIQLAPGANAVSTSNKVLARMEELGRTMPAGMSY  
SIPFNTAPFVKVSIKVIYTLLEAMALVFLVMFLFLQNI RYTLIPAIVAPIALLGTFSIMLLAGFSINVLTMFGMVLAIGIIVDDAI  
VVVENVERIMAKEGLSPKDATVKAMRQITGAVVSITLVLTAVFIPMAFASGSVGVIYQQFSLMAVSILFSAFLALTLPALC  
ATLLKPHTEKDFKKTGFFGWFNRTFDSMTKGYVSCVGKLVARTGRMMMIFIVIVAILILALRQLPTSFLPEEDQGYFMTTIQ  
LPADATSSERTLDVVEVFEEYIASRPAIASNLSILGFGFSGSGSNAAMAFTVLKDWKDWKREYTTLQEEVSLAQQAMVDISEGSA  
MSLMPPAIDELDTSSGFSMRLQDRANRGYEALKEAETKLLTAAQSKVVTGVYPDGLPSGVSIQLNINRLKAEAMGVSFSS  
ISDTLSTAMGSTYVSDFPNAGRMQQVILQADASARMQIEDVLNLYVRNISGGMVPLSEVTPVWTTETPLQLTRYQGFP  
IRISGAAAAGFSSGDAMQEMERLVDQLPAGFAVAWSGQSLQERQSSSQAPLLMALSMVLVFLVLAALYESWSIPLSVML  
VPLGLLGAVIAVLLREMPNDVFFKVGMITVIGLSAKNAILIVEFAKQLREQGEGLESAMIAARLRLRPILMTSLAFGLGVVP  
LVIASGASAEQRAIGTGVLGGIISATVLAVFFVPVFFVFI GLQERISRWRALD

>LpeB\_lpp2880\_L\_pneumophila

MKLTSYFIKHPVITIILNAMIVVLGLLCLYNLSVREYPDINFPTITVSASYPNASPDLVETAITNVLEDRLAGIEGLETITSQSSA  
GYAQITLMFRSGTSMDRALSTTQDAVGVAKALLPPEVRSPTVERQRKSNGLPFIGISLESTSKDFGELTHYANLNLKNVFRS  
VQGVASVEVWGQPYTYNITLQPEKLFSGVNVDEIVNALAKNRISLPAGNYRNKIPSTLNSELKTREDYENLLIKANSKHPIL  
LKSLANVALETDNSQMRVRVNGHAGVVL SINKANEANPIEVSKEIRKVIKGLQQGLPKDLKINTIIDQSDFINASIKNIRSAI  
GEAIFLVLIIVFLFLRNIKATIIPLITIPISLLGSLFLKLFGFSINLMTLLAMVLAIGLVVDDAIIVLENIWRHIESGLSPLDAALKGA  
REIGFAIIAMTFTLSSVYLP IAFIQGMLGQLFVEFAVALAGSVFISGIVALTLSPLMCANLLSASSKNWWPQFDNALEKLT KH  
YSNILQFILKHQKITLLTALISVVACFGFYNLISHETAPKEDRGLIGIYIPPVAGEDIGMLDNKTGKLEKKLDAIPEANNRLTFIG  
DWGGSIVLPLKPHAQRHR SANQIVEKL RPSFNHFPSMDPHVWSWDTGLPGVDDAGSGSELT LVISTPDHFRQLFDETEK  
LKSVDLDSKSLFAAVNYDLRLDTMGYNIDLDYNQLAKLGLTANQVAKTIEVFFSGDKSQTFEKDGVVYNISIKGDSSPWTLN  
ELYLTNEGKSVSLGAITKMQPKAQPATLDHYQQMRSTTLHVQLHKGDSMAKAEKLWGTTKEVMPQHYKLTWIGA AK  
AFHESSNSMLFLFLSLAFIYAILCTQFENFTDPFIILFTVPLACSGALLFTYLFQGSLNIYTQVGLITLIGLISKHGILIVEFANKLH  
KDGASLPEAIQKSAALRLRPILMTTGAMVFGAIPVLVSHDAGSESRHAIGTVLISGLGLGLTFTLVLPVYNNIISK LIDMQK  
TGGKKRCSKE
