# Supplementary material for: Ever-Adapting RND Efflux Pumps in Gram-Negative Multidrug-Resistant Pathogens: A Race against Time
Source: MDPI journal article supplement (doi:10.3390/antibiotics10070774), 2021-06-24
Supplement: s1 [file s1]

**Table S1. Overview of residue conservation based on 135 MDR-type RND pumps.**  
 The table details the residue variety in % for each position in the query sequence (AcrB-Ec). Each column shows the % for that amino-acid, found in the position based on AcrB-Ec. Analysis after ClustalOmega [65] and output data by ConSurf [68]. Efflux pumps selected from Zwama *et al.* (2019) [17]. Colors are per Figure 3a of the main article, with green being most variable and purple being most conserved.

| Position (#) | AA (%)    | Percentage | ConSurf Category | A      | C     | D     | E      | F      | G      | H      | I     | K      | L      | M      | N      | P      | Q      | R      | S      | T      | V      | W      | Y      |       |
|--------------|-----------|------------|------------------|--------|-------|-------|--------|--------|--------|--------|-------|--------|--------|--------|--------|--------|--------|--------|--------|--------|--------|--------|--------|-------|
| 1            | M 54.815  | 54.815     | 8                |        |       |       |        |        | 31.111 |        |       | 6.667  |        | 6.667  | 54.815 |        |        |        |        |        |        | 0.741  |        |       |
| 2            | A 31.852  | 31.852     | 7                | 31.852 |       |       |        |        |        |        |       |        |        | 2.963  | 0.741  |        | 14.074 |        |        | 31.111 | 18.519 |        | 0.741  |       |
| 3            | R 25.185  | 25.185     | 5                |        | 1.481 |       | 18.519 | 2.963  |        | 0.741  | 4.444 |        | 17.037 | 0.741  |        | 16.296 |        | 11.111 | 25.185 | 0.741  | 0.741  |        |        |       |
| 4            | F 71.852  | 71.852     | 7                |        |       |       |        |        | 71.852 |        |       | 12.593 |        | 0.741  | 2.963  |        | 1.481  |        |        |        | 2.222  | 3.704  |        | 4.444 |
| 5            | F 97.037  | 97.037     | 9                |        |       | 2.963 |        |        | 97.037 |        |       |        |        |        |        |        |        |        |        |        |        |        |        |       |
| 6            | I 88.889  | 88.889     | 9                |        |       |       |        |        |        |        |       | 88.889 |        |        |        |        |        |        |        |        | 0.741  | 10.37  |        |       |
| 7            | D 42.963  | 42.963     | 2                | 0.741  |       |       | 42.963 | 5.185  |        |        | 8.148 | 0.741  | 8.148  |        |        | 8.889  |        | 5.926  | 17.037 | 0.741  | 1.481  |        |        |       |
| 8            | R 93.333  | 93.333     | 9                |        |       |       |        |        |        |        | 3.704 |        | 2.222  |        |        |        |        | 0.741  | 93.333 |        |        |        |        |       |
| 9            | P 100.000 | 100        | 9                |        |       |       |        |        |        |        |       |        |        |        |        |        | 100    |        |        |        |        |        |        |       |
| 10           | I 56.296  | 56.296     | 8                |        |       |       |        |        |        |        |       | 56.296 | 3.704  |        |        | 2.222  |        |        | 0.741  |        |        | 37.037 |        |       |
| 11           | F 76.296  | 76.296     | 8                |        |       |       |        |        | 76.296 |        |       | 0.741  |        | 21.481 | 0.741  |        |        |        |        |        | 0.741  |        |        |       |
| 12           | A 96.296  | 96.296     | 9                | 96.296 |       |       |        |        |        |        |       |        |        |        |        |        |        |        |        | 2.963  | 0.741  |        |        |       |
| 13           | W 55.556  | 55.556     | 5                | 7.407  |       |       |        |        | 2.222  | 2.963  |       | 9.63   |        | 5.926  | 0.741  | 0.741  |        |        |        | 8.148  | 2.963  | 3.704  | 55.556 |       |
| 14           | V 92.593  | 92.593     | 9                | 0.741  | 0.741 |       |        |        |        |        |       | 0.741  |        |        | 0.741  |        |        |        |        | 3.704  | 0.741  | 92.593 |        |       |
| 15           | I 48.889  | 48.889     | 7                |        |       |       |        |        | 0.741  |        |       | 48.889 |        | 31.111 | 1.481  |        |        |        |        |        |        | 17.037 |        |       |
| 16           | A 54.815  | 54.815     | 9                | 54.815 |       |       |        |        |        |        |       |        |        |        |        | 2.963  |        |        |        | 41.481 | 0.741  |        |        |       |
| 17           | I 54.074  | 54.074     | 6                | 0.741  |       |       |        |        | 1.481  |        |       | 54.074 |        | 37.037 | 1.481  |        |        |        |        | 0.741  | 1.481  | 2.963  |        |       |
| 18           | L 32.593  | 32.593     | 4                | 2.222  |       |       |        |        | 13.333 |        |       | 28.889 |        | 32.593 | 4.444  |        |        |        |        |        |        | 18.519 |        |       |
| 19           | I 67.407  | 67.407     | 7                | 0.741  |       |       |        |        | 0.741  |        |       | 67.407 |        | 14.815 | 5.926  |        |        |        |        |        | 2.963  | 7.407  |        |       |
| 20           | M 37.037  | 37.037     | 6                | 1.481  |       | 6.667 |        |        | 6.667  |        |       | 8.148  |        | 16.296 | 37.037 |        |        |        |        | 4.444  | 5.926  | 13.333 |        |       |
| 21           | L 65.926  | 65.926     | 6                | 2.222  |       |       |        |        | 1.481  |        |       | 21.481 |        | 65.926 | 5.185  |        |        |        |        |        |        | 3.704  |        |       |
| 22           | A 50.370  | 50.37      | 4                | 50.37  | 1.481 |       |        |        | 2.222  | 7.407  |       | 4.444  |        | 17.778 | 0.741  |        |        |        |        | 1.481  | 9.63   | 4.444  |        |       |
| 23           | G 100.000 | 100        | 9                |        |       |       |        |        |        | 100    |       |        |        |        |        |        |        |        |        |        |        |        |        |       |
| 24           | L 25.926  | 25.926     | 1                | 25.185 |       |       |        |        | 1.481  | 13.333 |       |        |        | 25.926 | 2.222  |        |        |        |        | 2.963  | 5.185  | 11.852 | 0.741  |       |
| 25           | L 53.333  | 53.333     | 6                | 2.963  |       |       |        | 0.741  | 3.704  |        |       | 18.519 |        | 53.333 | 1.481  | 1.481  |        | 10.37  | 2.963  |        | 3.704  | 0.741  |        |       |
| 26           | A 65.185  | 65.185     | 6                | 65.185 | 0.741 |       |        |        |        | 2.222  |       |        |        |        |        |        |        |        |        | 28.889 | 1.481  | 1.481  |        |       |
| 27           | I 56.296  | 56.296     | 5                | 3.704  |       |       |        |        | 4.444  | 0.741  |       | 56.296 |        | 18.519 | 5.926  |        |        |        |        |        | 6.667  | 2.222  | 1.481  |       |
| 28           | L 21.481  | 21.481     | 1                | 2.222  |       |       | 0.741  |        | 14.074 | 1.481  | 1.481 | 2.222  | 5.185  | 21.481 | 6.667  | 4.444  | 11.852 | 2.222  | 5.926  | 11.111 | 3.704  | 2.222  | 0.741  |       |
| 29           | K 31.852  | 31.852     | 1                | 1.481  |       |       | 1.481  | 2.222  | 1.481  | 2.222  |       | 2.222  | 31.852 | 4.444  |        | 7.407  |        | 16.296 | 2.963  | 17.778 | 5.926  | 2.222  |        |       |
| 30           | L 90.370  | 90.37      | 8                |        |       |       |        |        |        |        |       | 2.963  |        | 90.37  | 6.667  |        |        |        |        |        |        |        |        |       |
| 31           | P 78.519  | 78.519     | 6                | 3.704  |       | 0.741 |        | 2.963  |        | 1.481  |       |        |        |        |        | 1.481  | 78.519 | 5.185  |        | 3.704  | 1.481  | 0.741  |        |       |
| 32           | V 54.074  | 54.074     | 6                |        |       |       |        |        |        |        |       | 40.741 |        | 4.444  |        |        |        |        |        |        | 0.741  | 54.074 |        |       |
| 33           | A 31.852  | 31.852     | 6                | 31.852 |       | 0.741 | 19.259 |        |        |        |       | 0.741  |        | 0.741  | 0.741  | 4.444  |        | 0.741  | 20     | 19.259 | 2.222  |        |        |       |
| 34           | Q 66.667  | 66.667     | 8                | 0.741  |       |       | 20.741 | 1.481  |        |        | 0.741 |        |        |        | 2.222  |        |        | 66.667 | 5.185  | 1.481  |        |        | 0.741  |       |
| 35           | Y 93.333  | 93.333     | 8                |        |       |       |        | 5.926  |        |        | 0.741 |        |        |        |        |        |        |        |        |        |        |        | 93.333 |       |
| 36           | P 100.000 | 100        | 9                |        |       |       |        |        |        |        |       |        |        |        |        |        | 100    |        |        |        |        |        |        |       |
| 37           | T 18.519  | 18.519     | 2                | 5.185  |       |       | 17.037 | 17.037 |        |        |       |        | 7.407  | 1.481  | 0.741  | 8.889  |        | 8.148  | 2.963  | 11.111 | 18.519 | 1.481  |        |       |
| 38           | I 41.481  | 41.481     | 7                |        |       |       |        |        | 0.741  |        | 0.741 | 41.481 |        | 11.111 | 10.37  |        |        |        |        | 1.481  | 0.741  | 31.852 |        |       |
| 39           | A 54.815  | 54.815     | 7                | 54.815 |       | 2.963 | 8.889  |        |        |        |       |        | 0.741  |        |        | 1.481  |        | 0.741  |        | 5.185  | 12.593 | 12.593 |        |       |
| 40           | P 76.296  | 76.296     | 7                | 2.222  |       |       |        |        | 0.741  |        |       | 1.481  |        | 0.741  |        | 11.852 | 76.296 | 0.741  |        | 2.963  | 2.963  |        |        |       |
| 41           | P 78.519  | 78.519     | 8                | 7.407  |       |       |        |        |        |        | 0.741 |        |        |        |        | 0.741  | 78.519 |        |        | 2.963  | 8.148  | 1.481  |        |       |
| 42           | A 23.704  | 23.704     | 6                | 23.704 |       |       | 0.741  |        |        | 0.741  |       | 1.481  |        | 2.963  | 0.741  | 5.926  |        | 11.852 |        | 14.815 | 22.222 | 14.815 |        |       |
| 43           | V 62.963  | 62.963     | 7                | 0.741  |       |       |        |        |        |        |       | 34.815 |        | 1.481  |        |        |        |        |        |        |        | 62.963 |        |       |
| 44           | T 28.148  | 28.148     | 4                | 5.926  |       | 0.741 | 4.444  |        |        | 1.481  |       | 0.741  | 0.741  | 1.481  | 1.481  | 5.926  |        | 8.889  | 8.889  | 19.259 | 28.148 | 11.852 |        |       |
| 45           | I 54.074  | 54.074     | 8                |        |       |       |        |        |        |        |       | 54.074 |        | 1.481  |        |        |        |        |        |        |        | 44.444 |        |       |
| 46           | S 37.778  | 37.778     | 4                | 4.444  |       | 0.741 | 2.222  |        |        |        | 0.741 |        | 2.222  |        | 1.481  | 4.444  |        | 2.963  | 8.889  | 37.778 | 28.889 | 0.741  | 4.444  |       |
| 47           | A 66.667  | 66.667     | 8                | 66.667 |       |       |        |        | 0.741  | 1.481  |       |        |        |        |        |        |        |        | 0.741  |        | 24.444 | 5.926  |        |       |
| 48           | T 28.148  | 28.148     | 1                | 12.593 |       | 0.741 | 2.222  |        | 1.481  | 0.741  |       | 0.741  |        | 0.741  | 0.741  | 17.778 |        | 1.481  | 0.741  | 20.741 | 28.148 | 9.63   | 1.481  |       |
| 49           | Y 92.593  | 92.593     | 8                |        |       |       |        |        | 5.185  |        |       | 0.741  |        | 0.741  |        |        |        |        |        |        |        |        | 1.481  |       |
| 50           | P 82.963  | 82.963     | 6                | 2.222  |       | 0.741 |        |        |        |        |       | 2.963  |        | 0.741  |        |        | 82.963 |        |        | 2.963  | 2.963  | 1.481  | 2.963  |       |
| 51           | G 98.519  | 98.519     | 9                |        |       |       |        |        |        | 98.519 |       |        |        |        |        |        | 0.741  |        |        | 0.741  |        |        |        |       |
| 52           | A 100.000 | 100        | 9                |        | 100   |       |        |        |        |        |       |        |        |        |        |        |        |        |        |        |        |        |        |       |
| 53           | S 51.852  | 51.852     | 8                |        |       |       | 23.704 |        |        |        |       |        |        |        |        |        |        |        |        | 51.852 | 3.704  |        |        |       |
| 54           | A 77.037  | 77.037     | 8                | 77.037 |       |       |        |        |        | 0.741  |       |        |        |        |        |        | 17.778 |        |        | 4.444  |        |        |        |       |
| 55           | K 27.407  | 27.407     | 3                | 2.222  |       |       | 11.852 | 20.741 |        | 0.741  |       |        | 27.407 |        |        | 1.481  |        | 26.667 | 1.481  |        | 3.704  | 3.704  |        |       |
| 56           | T 51.852  | 51.852     | 7                |        |       |       | 1.481  | 0.741  | 0.741  | 0.741  |       | 1.481  |        | 16.296 |        |        |        |        |        |        | 51.852 | 26.667 |        |       |
| 57           | V 41.481  | 41.481     | 7                | 0.741  |       |       |        |        |        |        |       | 27.407 |        | 20.741 | 8.889  |        |        |        |        |        | 0.741  | 41.481 |        |       |
| 58           | Q 32.593  | 32.593     | 7                | 14.074 |       |       | 1.481  | 31.852 |        | 2.963  |       | 0.741  | 1.481  |        |        | 5.926  |        | 32.593 | 2.963  | 3.704  | 2.222  | 1.481  |        |       |
| 59           | D 32.593  | 32.593     | 5                | 2.963  |       |       | 32.593 | 17.037 |        | 16.296 |       |        | 2.222  |        |        | 20.741 |        | 4.444  |        |        | 2.222  | 1.481  |        |       |
| 60           | T 42.963  | 42.963     | 7                | 9.63   |       |       |        |        | 15.556 |        |       |        |        | 0.741  |        | 1.481  |        | 0.741  |        | 26.667 | 42.963 |        | 2.222  |       |
| 61           | V 82.963  | 82.963     | 9                |        |       |       |        |        |        |        |       | 17.037 |        |        |        |        |        |        |        |        |        | 82.963 |        |       |
| 62           | T 62.222  | 62.222     | 8                | 20     |       |       |        |        |        |        |       | 2.963  |        | 1.481  |        |        |        |        |        | 1.481  | 62.222 | 11.852 |        |       |
| 63           | Q 51.111  | 51.111     | 7                | 6.667  |       |       | 1.481  | 0.741  |        | 1.481  |       |        | 0.741  | 0.741  |        | 0.741  |        | 51.111 | 2.222  | 18.519 | 14.815 | 0.741  |        |       |
| 64           | V 40.741  | 40.741     | 7                | 0.741  |       |       |        |        |        |        |       | 9.63   | 2.963  | 6.667  |        |        | 37.037 | 1.481  | 0.741  |        | 40.741 |        |        |       |

|     |           |        |   |        |       |        |        |        |        |        |        |        |        |        |        |        |        |        |        |  |
|-----|-----------|--------|---|--------|-------|--------|--------|--------|--------|--------|--------|--------|--------|--------|--------|--------|--------|--------|--------|--|
| 65  | I 64.444  | 64.444 | 7 |        |       |        |        |        | 64.444 |        | 31.852 | 0.741  |        |        |        |        |        |        | 2.963  |  |
| 66  | E 92.593  | 92.593 | 9 | 0.741  |       | 92.593 |        |        |        | 0.741  |        |        |        | 4.444  |        |        |        | 1.481  | 0.741  |  |
| 67  | Q 68.148  | 68.148 | 7 |        | 0.741 | 14.074 |        |        |        |        |        |        | 1.481  | 68.148 | 11.111 | 0.741  | 0.741  |        |        |  |
| 68  | N 25.926  | 25.926 | 6 |        |       | 23.704 |        |        |        | 2.222  |        |        | 25.926 | 17.778 | 2.222  | 9.63   |        |        |        |  |
| 69  | M 36.296  | 36.296 | 7 |        |       | 1.481  |        | 0.741  | 26.667 |        | 23.704 | 36.296 |        | 0.741  |        |        |        |        | 11.111 |  |
| 70  | N 44.444  | 44.444 | 8 |        |       | 15.556 |        |        |        | 5.926  |        |        | 44.444 | 0.741  |        | 12.593 | 20     | 0.741  |        |  |
| 71  | G 80.000  | 80     | 8 |        |       | 1.481  |        | 80     |        |        |        |        |        | 5.926  |        | 10.37  | 0.741  |        |        |  |
| 72  | V 31.852  | 31.852 | 8 | 20     |       |        |        |        | 25.926 |        | 20.741 |        |        |        |        |        | 1.481  | 31.852 |        |  |
| 73  | D 57.778  | 57.778 | 7 |        |       | 57.778 | 31.111 |        |        | 6.667  |        |        | 0.741  | 1.481  | 0.741  | 1.481  |        |        |        |  |
| 74  | N 48.148  | 48.148 | 4 |        |       | 6.667  |        | 34.815 | 7.407  |        |        |        | 48.148 |        |        |        |        |        |        |  |
| 75  | L 53.333  | 53.333 | 8 |        |       |        |        | 0.741  |        | 18.519 |        | 53.333 | 24.444 |        |        | 0.741  |        |        | 2.963  |  |
| 76  | L 34.074  | 34.074 | 5 | 0.741  |       | 20.741 | 1.481  |        |        | 5.185  |        | 34.074 | 26.667 |        | 0.741  | 6.667  | 1.481  | 0.741  | 1.481  |  |
| 77  | Y 95.556  | 95.556 | 9 |        |       |        | 1.481  |        |        |        |        |        |        |        |        | 0.741  | 2.222  |        | 95.556 |  |
| 78  | M 60.000  | 60     | 7 |        |       |        | 15.556 |        |        | 11.852 |        | 6.667  | 60     |        |        |        | 0.741  |        | 3.704  |  |
| 79  | S 54.815  | 54.815 | 6 |        |       | 2.222  |        | 2.963  |        | 0.741  | 4.444  |        |        | 2.222  |        | 2.963  | 54.815 | 12.593 | 1.481  |  |
| 80  | S 94.815  | 94.815 | 9 |        |       | 3.704  |        |        |        | 0.741  |        |        |        |        |        |        | 94.815 | 1.481  |        |  |
| 81  | T 25.926  | 25.926 | 4 |        |       |        |        | 2.963  |        |        |        |        |        | 9.63   | 22.222 | 1.481  | 24.444 | 25.926 | 6.667  |  |
| 82  | S 78.519  | 78.519 | 8 | 12.593 | 0.741 |        |        |        |        |        |        |        | 0.741  | 1.481  |        |        | 78.519 | 1.481  | 2.963  |  |
| 83  | D 27.481  | 27.481 | 5 |        |       | 6.107  | 27.481 | 2.29   | 0.763  | 4.58   |        |        | 0.763  | 8.397  | 3.053  | 2.29   | 23.664 | 14.504 | 3.817  |  |
| 84  | S 66.038  | 66.038 | 7 |        |       | 8.491  | 3.774  |        |        | 5.66   |        |        |        | 7.547  |        | 0.943  | 66.038 | 7.547  |        |  |
| 85  | D 24.444  | 24.444 | 5 |        |       | 8.889  | 24.444 | 1.481  | 2.222  | 0.741  |        | 4.444  | 1.481  | 9.63   | 3.704  | 10.37  | 19.259 | 13.333 |        |  |
| 86  | G 94.074  | 94.074 | 9 |        |       |        |        |        | 94.074 |        |        |        |        | 2.963  |        |        | 2.963  |        |        |  |
| 87  | S 27.407  | 27.407 | 1 | 4.444  |       | 0.741  | 1.481  | 1.481  |        | 1.481  | 0.741  | 5.185  | 1.481  | 2.963  | 11.111 | 10.37  | 9.63   | 27.407 | 7.407  |  |
| 88  | A 30.370  | 30.37  | 6 |        | 0.741 | 30.37  |        |        |        | 0.741  |        |        | 8.148  | 11.852 |        |        | 21.481 | 1.481  | 17.778 |  |
| 89  | T 37.778  | 37.778 | 2 |        |       | 2.222  | 0.741  | 5.185  | 0.741  |        |        | 2.222  | 3.704  | 0.741  | 3.704  | 15.556 | 3.704  | 15.556 | 3.704  |  |
| 90  | I 56.296  | 56.296 | 6 |        |       |        |        |        |        | 56.296 |        | 20     | 0.741  |        |        |        | 2.222  | 20.741 |        |  |
| 91  | T 69.630  | 69.63  | 6 |        |       | 0.741  | 1.481  |        |        | 2.963  | 1.481  |        | 2.963  | 8.148  |        | 2.222  | 8.889  | 69.63  | 1.481  |  |
| 92  | L 42.222  | 42.222 | 6 | 14.074 |       |        |        |        |        | 16.296 |        |        | 42.222 |        |        |        |        | 2.222  | 27.407 |  |
| 93  | T 66.667  | 66.667 | 7 |        |       |        |        | 2.963  | 2.222  |        | 4.444  | 0.741  | 0.741  | 3.704  |        | 0.741  | 3.704  | 8.148  | 66.667 |  |
| 94  | F 80.741  | 80.741 | 9 |        |       | 2.222  |        | 80.741 |        | 1.481  |        |        | 5.926  | 9.63   |        |        |        |        |        |  |
| 95  | E 31.852  | 31.852 | 1 | 12.593 |       | 4.444  | 31.852 |        | 0.741  | 1.481  | 20.741 | 1.481  |        | 4.444  |        | 6.667  | 8.148  |        | 4.444  |  |
| 96  | L 25.926  | 25.926 | 4 | 15.556 |       | 0.741  |        |        | 0.741  | 8.148  |        | 25.926 | 0.741  | 1.481  | 14.815 | 10.37  | 15.556 | 3.704  | 1.481  |  |
| 97  | G 77.778  | 77.778 | 8 |        |       | 4.444  | 0.741  |        | 77.778 | 1.481  |        |        |        | 15.556 |        |        |        |        |        |  |
| 98  | T 78.519  | 78.519 | 8 | 3.704  |       | 0.741  | 2.222  | 0.741  |        | 2.963  |        |        |        |        |        | 2.222  | 1.481  | 78.519 | 2.222  |  |
| 99  | D 77.778  | 77.778 | 7 |        |       | 77.778 | 0.741  |        | 0.741  |        | 0.741  |        |        | 19.259 |        |        | 0.741  | 0.741  |        |  |
| 100 | P 60.741  | 60.741 | 1 | 14.815 |       | 0.741  | 0.741  | 0.741  |        | 0.741  |        | 7.407  | 0.741  |        | 60.741 |        | 7.407  | 2.222  | 2.963  |  |
| 101 | D 71.852  | 71.852 | 7 | 1.481  |       | 71.852 | 5.926  |        | 1.481  | 1.481  | 0.741  |        |        | 8.148  |        | 1.481  | 2.222  | 4.444  | 0.741  |  |
| 102 | I 34.074  | 34.074 | 4 | 2.963  | 0.741 |        | 9.63   | 2.963  |        | 34.074 | 5.185  | 11.852 | 5.185  | 3.704  | 8.148  | 4.444  | 0.741  | 7.407  | 2.222  |  |
| 103 | A 95.556  | 95.556 | 9 | 95.556 |       | 0.741  |        |        |        |        |        | 2.963  |        |        |        |        |        | 0.741  | 0.741  |  |
| 104 | Q 63.704  | 63.704 | 7 | 5.185  |       | 0.741  | 2.963  | 0.741  |        |        |        | 12.593 | 3.704  |        | 63.704 | 1.481  | 0.741  | 1.481  | 6.667  |  |
| 105 | V 62.222  | 62.222 | 8 | 9.63   |       |        |        |        | 4.444  |        |        | 2.963  | 1.481  |        | 8.148  |        | 2.963  | 8.148  | 62.222 |  |
| 106 | Q 54.815  | 54.815 | 7 | 0.741  |       | 19.259 | 11.852 |        |        | 1.481  | 2.963  | 0.741  | 6.667  |        | 54.815 | 0.741  |        | 0.741  |        |  |
| 107 | V 82.222  | 82.222 | 8 |        |       |        |        |        | 11.111 |        |        | 4.444  |        |        |        |        |        | 2.222  | 82.222 |  |
| 108 | Q 77.778  | 77.778 | 8 | 0.741  |       |        |        |        |        |        |        | 8.148  | 3.704  | 2.963  | 77.778 | 2.222  | 1.481  | 2.963  |        |  |
| 109 | N 77.778  | 77.778 | 9 | 14.074 |       | 2.222  |        |        |        |        |        |        |        | 77.778 |        |        | 5.926  |        |        |  |
| 110 | K 58.519  | 58.519 | 8 | 0.741  |       |        |        |        |        | 58.519 |        |        |        |        | 8.889  | 31.111 | 0.741  |        |        |  |
| 111 | LV 44.444 | 44.444 | 8 | 2.222  |       |        |        |        | 7.407  |        | 44.444 |        |        |        |        |        | 0.741  | 0.741  | 44.444 |  |
| 112 | Q 39.259  | 39.259 | 6 | 11.852 | 0.741 | 1.481  | 0.741  | 1.481  |        | 11.111 |        |        |        | 17.037 | 39.259 |        | 13.333 | 2.963  |        |  |
| 113 | L 27.407  | 27.407 | 4 | 11.111 |       | 3.704  |        | 1.481  |        | 1.481  | 2.222  | 27.407 |        |        | 25.185 | 7.407  | 15.556 | 1.481  | 2.963  |  |
| 114 | A 62.222  | 62.222 | 7 |        |       |        |        |        |        | 5.926  |        |        |        |        | 1.481  |        |        | 3.704  | 26.667 |  |
| 115 | M 25.185  | 25.185 | 4 | 0.741  |       | 20     |        |        |        | 1.481  | 2.963  | 9.63   | 25.185 | 1.481  |        | 2.963  | 16.296 | 1.481  | 17.037 |  |
| 116 | P 42.222  | 42.222 | 4 | 15.556 | 1.481 |        | 0.741  | 2.963  |        | 0.741  |        |        | 5.185  |        | 42.222 |        | 7.407  | 17.778 | 2.222  |  |
| 117 | R 30.370  | 30.37  | 5 | 1.481  |       | 2.963  | 2.222  | 1.481  |        | 13.333 | 25.185 | 0.741  | 2.222  |        |        | 13.333 | 30.37  | 2.963  | 2.222  |  |
| 118 | L 97.778  | 97.778 | 9 |        |       |        |        |        |        |        | 97.778 | 1.481  |        |        | 0.741  |        |        |        | 1.481  |  |
| 119 | P 99.259  | 99.259 | 9 |        |       |        |        |        |        |        |        |        |        | 99.259 | 0.741  |        |        |        |        |  |
| 120 | Q 47.407  | 47.407 | 4 | 6.667  | 1.481 | 17.778 |        |        |        | 2.222  | 1.481  |        | 2.222  | 5.185  | 47.407 | 3.704  | 8.889  | 2.963  |        |  |
| 121 | E 54.815  | 54.815 | 9 | 11.852 | 9.63  | 54.815 |        | 4.444  |        | 0.741  |        | 0.741  | 1.481  | 2.222  | 1.481  | 0.741  | 5.926  | 3.704  | 2.222  |  |
| 122 | V 77.037  | 77.037 | 4 | 12.593 |       |        |        |        |        | 4.444  |        |        |        |        |        |        | 4.444  | 1.481  | 77.037 |  |
| 123 | Q 53.333  | 53.333 | 7 |        |       | 2.963  | 11.852 |        |        | 1.481  | 0.741  | 1.481  |        | 2.222  | 53.333 | 17.037 |        | 6.667  |        |  |
| 124 | Q 36.296  | 36.296 | 6 | 2.963  |       | 15.556 | 2.222  |        |        | 2.963  |        | 1.481  | 0.741  | 5.185  | 0.741  | 36.296 | 22.963 | 4.444  | 2.222  |  |
| 125 | Q 55.556  | 55.556 | 7 |        |       | 0.741  | 0.741  |        |        | 2.963  | 6.667  | 1.481  | 6.667  |        | 20.741 | 55.556 | 0.741  | 1.481  | 1.481  |  |
| 126 | G 78.519  | 78.519 | 8 | 1.481  |       |        |        | 78.519 |        | 0.741  |        |        |        |        |        |        | 3.704  | 3.704  | 11.852 |  |
| 127 | V 46.667  | 46.667 | 6 |        |       |        |        |        | 36.296 |        | 15.556 | 1.481  |        |        |        |        |        | 46.667 |        |  |
| 128 | T 34.815  | 34.815 | 3 |        |       | 2.222  | 3.704  | 0.741  | 0.741  | 2.222  | 2.963  | 0.741  | 0.741  | 5.926  | 11.852 | 8.148  | 17.778 | 34.815 | 5.926  |  |
| 129 | V 72.593  | 72.593 | 8 | 0.741  |       | 0.741  |        |        |        | 2.222  | 3.704  | 2.222  | 2.222  |        |        | 2.222  | 4.444  | 8.889  | 72.593 |  |
| 130 | E 27.407  | 27.407 | 3 | 4.444  |       | 8.889  | 27.407 | 1.481  |        | 3.704  | 1.481  |        |        | 4.444  | 11.852 | 8.148  | 14.815 | 11.111 | 2.222  |  |
| 131 | K 67.407  | 67.407 | 7 |        |       | 5.926  |        |        |        | 67.407 |        |        |        |        | 3.704  | 1.481  | 11.111 | 8.889  | 0.741  |  |
| 132 | S 34.074  | 34.074 | 5 | 24.444 |       | 0.741  |        | 0.741  |        | 13.333 | 4.444  |        | 0.741  |        | 4.444  | 3.704  | 34.074 | 10.37  | 1.481  |  |
| 133 | S 51.111  | 51.111 | 6 | 6.667  |       | 8.889  | 1.481  |        |        | 11.852 |        |        |        |        | 6.667  | 1.481  | 51.111 | 5.185  | 2.963  |  |

|               |        |   |        |        |        |        |        |        |        |        |        |        |        |        |        |        |        |        |        |        |        |
|---------------|--------|---|--------|--------|--------|--------|--------|--------|--------|--------|--------|--------|--------|--------|--------|--------|--------|--------|--------|--------|--------|
| 134 S 40.152  | 40.152 | 5 | 7.576  | 9.091  | 0.758  |        | 2.273  |        | 0.758  | 1.515  |        | 0.758  | 5.303  | 15.909 | 1.515  | 3.788  | 40.152 | 9.848  | 0.758  |        |        |
| 135 S 31.852  | 31.852 | 5 | 2.963  | 13.333 |        | 3.704  | 11.111 |        | 0.741  |        | 1.481  |        | 16.296 |        |        |        | 31.852 | 17.778 | 0.741  |        |        |
| 136 F 48.889  | 48.889 | 7 | 15.556 |        |        | 48.889 | 2.222  |        | 6.667  |        | 14.074 | 2.963  | 5.926  | 0.741  |        |        | 1.481  | 0.741  |        |        | 0.741  |
| 137 L 63.910  | 63.910 | 7 | 3.008  |        |        | 1.504  |        |        | 8.271  |        | 63.91  | 5.263  |        |        | 0.752  |        | 1.481  | 0.741  | 5.263  |        |        |
| 138 M 56.391  | 56.391 | 6 | 5.263  |        | 0.752  | 0.752  |        | 0.752  | 1.504  |        | 27.82  | 56.391 | 2.256  |        | 3.759  |        | 2.256  | 9.774  | 0.752  |        |        |
| 139 V 49.630  | 49.63  | 7 |        | 0.741  |        | 1.481  | 4.444  |        | 11.852 |        | 4.444  | 4.444  |        |        |        |        |        | 4.444  | 49.63  | 18.519 |        |
| 140 V 37.778  | 37.778 | 5 | 18.519 |        |        |        |        | 0.741  | 23.704 |        | 12.593 | 2.963  |        |        | 0.741  |        |        | 0.741  | 37.778 | 2.222  |        |
| 141 G 32.593  | 32.593 | 6 | 26.667 |        |        |        | 32.593 | 11.111 |        |        |        | 0.741  | 5.926  |        | 0.741  | 0.741  | 14.815 | 5.926  | 0.741  |        |        |
| 142 F 49.630  | 49.63  | 6 |        |        |        | 49.63  |        |        | 2.222  |        | 35.556 | 3.704  |        |        |        |        |        | 8.889  |        |        |        |
| 143 V 21.481  | 21.481 | 1 | 1.481  | 0.741  | 0.741  | 4.444  |        | 0.741  | 16.296 | 1.481  | 2.222  |        | 0.741  |        | 2.222  | 2.963  | 9.63   | 19.259 | 21.481 | 0.741  | 14.815 |
| 144 S 82.963  | 82.963 | 9 | 2.963  |        |        | 6.667  | 0.741  |        |        |        |        |        | 5.926  |        |        |        | 82.963 |        |        | 0.741  |        |
| 145 P 29.907  | 29.907 | 1 | 2.804  | 14.953 | 19.626 |        | 0.935  |        |        | 5.607  |        |        |        | 29.907 | 0.935  | 0.935  | 4.673  | 19.626 |        |        |        |
| 146 D 56.190  | 56.19  | 2 | 0.952  | 56.19  | 3.81   |        | 2.857  |        |        | 3.81   |        |        | 17.143 |        | 1.905  | 0.952  | 7.619  | 4.762  |        |        |        |
| 147 G 44.030  | 44.03  | 1 | 2.239  | 12.687 | 8.209  |        | 44.03  |        |        | 6.716  |        |        | 9.701  | 7.463  | 4.478  | 0.746  | 1.493  | 2.239  |        |        |        |
| 148 S 27.407  | 27.407 | 1 | 2.222  | 2.222  | 7.407  |        | 2.963  |        | 2.222  | 11.111 | 0.741  |        | 5.185  |        | 6.667  | 18.519 | 27.407 | 12.593 | 0.741  |        |        |
| 149 M 34.074  | 34.074 | 4 | 1.481  | 0.741  | 0.741  | 3.704  | 0.741  | 4.444  | 2.963  | 2.222  | 22.222 | 34.074 | 0.741  |        | 1.481  | 2.222  | 1.481  | 2.222  | 1.481  | 17.037 |        |
| 150 D 42.222  | 42.222 | 3 | 0.741  | 42.222 | 3.704  |        | 0.741  | 0.741  |        | 1.481  |        |        | 7.407  | 0.741  | 0.741  |        | 20.741 | 20     | 0.741  |        |        |
| 151 Q 22.222  | 22.222 | 1 | 7.407  | 5.926  | 5.926  | 0.741  | 3.704  |        |        | 9.63   | 0.741  | 5.185  | 5.926  | 5.926  | 22.222 | 5.185  | 9.63   | 6.667  | 1.481  |        |        |
| 152 L 14.074  | 14.074 | 1 | 7.407  | 9.63   | 10.37  | 2.222  | 1.481  |        | 3.704  | 1.481  | 14.074 | 0.741  | 5.926  | 5.926  | 9.63   |        | 11.852 | 9.63   | 5.185  |        | 0.741  |
| 153 D 44.444  | 44.444 | 7 | 10.37  | 44.444 | 8.148  | 5.926  |        |        |        |        |        |        |        |        |        | 0.741  |        |        |        | 0.741  | 14.074 |
| 154 I 53.333  | 53.333 | 7 |        |        |        |        |        |        | 53.333 |        | 37.778 | 2.963  |        |        |        |        |        | 0.741  | 5.185  |        |        |
| 155 S 37.037  | 37.037 | 6 | 25.185 | 0.741  |        |        | 8.148  |        |        | 0.741  |        |        | 4.444  |        |        | 5.185  | 37.037 | 17.778 |        | 0.741  |        |
| 156 D 70.370  | 70.37  | 9 |        | 70.37  | 0.741  |        |        | 0.741  |        |        |        |        | 27.407 |        |        |        | 0.741  |        |        |        |        |
| 157 Y 90.370  | 90.37  | 8 |        |        |        | 4.444  |        |        | 2.963  |        |        |        |        |        |        |        |        |        |        | 2.222  | 90.37  |
| 158 V 31.111  | 31.111 | 6 | 26.667 |        |        | 0.741  |        |        | 12.593 |        | 22.963 | 5.185  |        |        |        |        |        | 0.741  | 31.111 |        |        |
| 159 A 31.852  | 31.852 | 3 |        | 2.222  | 6.667  |        | 8.148  |        | 1.481  | 0.741  | 4.444  | 0.741  | 5.926  |        | 0.741  | 0.741  | 11.111 | 9.63   | 14.815 |        | 0.741  |
| 160 S 31.111  | 31.111 | 7 | 11.852 |        |        |        | 0.741  |        | 3.704  |        | 17.037 |        | 1.481  |        | 1.481  | 30.37  | 31.111 | 2.222  |        |        |        |
| 161 N 57.778  | 57.778 | 6 | 1.481  |        |        |        |        | 4.444  | 0.741  | 2.222  | 0.741  |        | 57.778 |        | 3.704  | 2.222  | 5.185  | 1.481  | 17.037 | 2.963  |        |
| 162 V 45.185  | 45.185 | 5 |        |        |        |        |        |        | 34.074 |        | 12.593 | 8.148  |        |        |        |        |        |        | 45.185 |        |        |
| 163 K 37.037  | 37.037 | 5 |        | 0.741  | 2.963  |        |        |        | 4.444  | 37.037 | 6.667  | 1.481  |        |        | 30.37  | 5.926  | 2.222  | 5.185  |        |        |        |
| 164 D 59.259  | 59.259 | 6 |        | 59.259 | 11.852 |        | 0.741  |        |        |        |        | 5.185  |        | 21.481 | 1.481  |        |        |        |        |        |        |
| 165 P 33.333  | 33.333 | 4 | 11.111 |        | 22.222 |        |        |        | 1.481  | 5.926  |        | 1.481  | 0.741  | 33.333 | 14.074 | 4.444  | 1.481  | 2.222  | 1.481  |        |        |
| 166 L 60.741  | 60.741 | 5 |        |        |        | 5.926  |        |        | 28.889 |        | 60.741 | 1.481  |        |        |        |        |        | 2.963  |        |        |        |
| 167 S 48.148  | 48.148 | 6 | 18.519 |        | 2.963  | 5.926  | 1.481  |        | 4.444  | 2.222  |        |        | 0.741  |        | 3.704  | 10.37  | 48.148 | 0.741  | 0.741  |        |        |
| 168 R 77.778  | 77.778 | 9 | 5.185  |        |        | 0.741  |        |        | 0.741  |        |        |        |        |        | 2.222  | 77.778 | 2.963  | 10.37  |        |        |        |
| 169 V 34.074  | 34.074 | 4 | 1.481  |        |        |        |        |        |        |        | 25.926 |        |        |        |        |        | 0.741  | 12.593 | 34.074 |        |        |
| 170 P 21.481  | 21.481 | 1 | 5.185  | 14.815 | 12.593 | 0.741  | 2.963  |        | 5.926  |        |        |        | 13.333 | 21.481 | 3.704  | 0.741  | 14.074 | 3.704  |        | 0.741  |        |
| 171 G 100.000 | 100    | 9 |        |        |        | 100    |        |        |        |        |        |        |        |        |        |        |        |        |        |        |        |
| 172 V 89.630  | 89.63  | 9 | 0.741  |        |        |        |        |        | 6.667  |        |        | 2.222  |        |        |        |        |        | 0.741  | 89.63  |        |        |
| 173 G 76.296  | 76.296 | 7 | 12.593 |        |        |        | 76.296 |        |        |        |        |        | 0.741  |        | 4.444  |        | 5.185  | 0.741  |        |        |        |
| 174 D 34.815  | 34.815 | 2 | 3.704  | 34.815 | 14.074 |        |        |        |        | 15.556 |        | 0.741  | 5.185  |        | 7.407  | 6.667  | 10.37  | 1.481  |        |        |        |
| 175 V 54.815  | 54.815 | 7 | 18.519 |        |        | 3.704  |        |        | 14.815 |        | 2.963  |        |        |        |        |        |        | 5.185  | 54.815 |        |        |
| 176 Q 58.519  | 58.519 | 5 | 0.741  | 11.852 | 8.889  |        | 2.222  |        |        |        | 2.222  | 0.741  | 2.963  |        | 58.519 | 4.444  | 3.704  | 2.222  | 1.481  |        |        |
| 177 L 43.704  | 43.704 | 4 | 6.667  |        |        | 1.481  |        |        | 16.296 |        | 43.704 | 0.741  | 1.481  | 1.481  |        |        | 1.481  | 2.222  | 21.481 |        | 0.741  |
| 178 F 69.630  | 69.63  | 7 | 0.741  |        | 0.741  | 69.63  | 0.741  |        | 1.481  |        | 11.111 | 1.481  |        |        |        |        |        |        |        | 11.852 |        |
| 179 G 97.778  | 97.778 | 9 | 0.741  |        |        |        | 97.778 |        |        |        |        |        |        |        |        |        |        |        |        |        |        |
| 180 S 33.582  | 33.582 | 4 | 21.642 | 0.746  |        |        | 14.925 |        | 2.985  | 0.746  | 0.746  | 1.493  | 0.746  | 9.701  | 7.463  | 33.582 | 5.224  |        |        |        |        |
| 181 Q 37.037  | 37.037 | 6 |        | 14.815 | 21.481 |        | 0.741  |        | 4.444  |        |        | 1.481  | 4.444  | 37.037 | 1.481  | 1.481  | 10.37  | 2.222  |        |        |        |
| 182 Y 72.593  | 72.593 | 7 | 2.222  |        |        | 11.852 |        | 0.741  | 2.222  | 2.222  |        |        |        | 0.741  | 3.704  | 3.704  |        |        |        | 72.593 |        |
| 183 A 78.519  | 78.519 | 8 | 78.519 |        |        |        | 1.481  |        |        |        |        |        |        |        |        |        | 19.259 | 0.741  |        |        |        |
| 184 M 87.407  | 87.407 | 9 |        |        |        |        |        |        | 0.741  |        | 10.37  | 87.407 |        |        |        |        |        |        | 0.741  |        | 0.741  |
| 185 R 97.778  | 97.778 | 9 |        |        |        |        |        |        |        |        |        |        | 2.222  |        |        | 97.778 |        |        |        |        |        |
| 186 I 68.889  | 68.889 | 7 | 1.481  |        |        |        |        |        | 68.889 |        | 5.185  |        |        |        |        |        |        |        | 24.444 | 98.519 |        |
| 187 W 98.519  | 98.519 | 9 |        |        |        | 0.741  |        |        |        |        |        |        |        |        |        |        |        |        |        |        |        |
| 188 L 81.481  | 81.481 | 8 |        |        |        |        |        |        | 2.222  |        | 81.481 | 7.407  |        | 0.741  |        |        |        |        | 8.148  |        |        |
| 189 D 74.815  | 74.815 | 7 |        | 74.815 |        |        |        |        |        | 2.963  |        |        | 16.296 |        | 1.481  | 3.704  | 0.741  |        |        |        |        |
| 190 P 91.111  | 91.111 | 7 | 4.444  |        |        |        | 0.741  |        |        |        |        |        |        | 91.111 |        |        | 2.222  | 1.481  |        |        |        |
| 191 N 20.741  | 20.741 | 1 | 13.333 | 20     | 12.593 |        | 0.741  | 4.444  | 0.741  | 2.963  | 2.222  | 0.741  | 20.741 | 0.741  | 8.148  | 2.222  | 2.222  | 5.185  | 2.222  |        | 0.741  |
| 192 K 68.889  | 68.889 | 6 | 3.704  |        | 2.963  |        |        | 0.741  |        | 68.889 | 4.444  |        |        |        | 2.222  | 15.556 | 0.741  |        | 0.741  |        |        |
| 193 L 63.704  | 63.704 | 7 |        |        |        |        |        |        | 2.222  |        | 63.704 | 25.185 |        |        |        |        |        | 1.481  | 7.407  |        |        |
| 194 A 40.741  | 40.741 | 4 | 40.741 | 0.741  | 1.481  | 0.741  | 0.741  | 1.481  | 2.222  | 1.481  | 2.222  | 0.741  | 27.407 |        | 4.444  | 1.481  | 2.222  | 6.667  | 5.185  |        |        |
| 195 S 25.926  | 25.926 | 5 | 25.185 | 2.222  | 0.741  |        | 11.111 |        | 0.741  | 9.63   |        |        | 16.296 |        | 5.926  | 0.741  | 25.926 | 1.481  |        |        |        |
| 196 Y 37.778  | 37.778 | 2 |        |        |        | 26.667 | 2.963  |        |        | 13.333 | 0.741  | 0.741  |        |        | 2.222  | 13.333 |        | 2.222  |        | 37.778 |        |
| 197 N 29.630  | 29.63  | 3 | 3.704  | 4.444  | 2.963  |        | 25.185 | 0.741  |        | 5.185  |        |        | 29.63  |        | 22.222 | 0.741  | 5.185  |        |        |        |        |
| 198 L 74.815  | 74.815 | 6 |        |        |        | 0.741  |        |        | 5.185  |        | 74.815 | 9.63   |        |        |        |        |        |        | 9.63   |        |        |
| 199 T 71.852  | 71.852 | 8 |        |        |        |        |        |        | 0.741  |        |        | 7.407  | 1.481  |        |        |        | 17.778 | 71.852 | 0.741  |        |        |
| 200 P 40.000  | 40     | 4 | 28.148 |        |        | 1.481  | 1.481  |        | 3.704  |        |        | 3.704  |        | 40     |        |        | 2.963  | 11.111 | 7.407  |        |        |
| 201 S 22.222  | 22.222 | 1 | 15.556 | 3.704  | 1.481  |        | 5.926  |        |        | 4.444  | 4.444  | 2.222  | 5.185  | 0.741  | 5.185  |        | 22.222 | 13.333 | 15.556 |        |        |
| 202 D 81.481  | 81.481 | 7 | 1.481  | 81.481 | 9.63   |        |        |        |        |        |        |        | 0.741  |        | 5.926  |        |        | 0.741  |        |        |        |





[illegible]



|               |        |   |        |        |        |        |        |        |        |        |        |        |        |        |        |        |        |        |
|---------------|--------|---|--------|--------|--------|--------|--------|--------|--------|--------|--------|--------|--------|--------|--------|--------|--------|--------|
| 479 V 29.630  | 29.63  | 4 | 21.481 |        |        | 8.148  | 3.704  |        | 16.296 | 12.593 | 0.741  |        |        |        | 2.222  | 5.185  | 29.63  |        |
| 480 L 47.407  | 47.407 | 8 |        |        |        | 11.852 |        |        | 34.815 | 47.407 |        |        |        |        |        |        | 5.926  |        |
| 481 S 100.000 | 100    | 9 |        |        |        |        |        |        |        |        |        |        |        |        | 100    |        |        |        |
| 482 V 40.741  | 40.741 | 8 | 27.407 |        |        |        | 25.926 |        |        | 0.741  |        |        |        |        | 4.444  | 0.741  | 40.741 |        |
| 483 L 38.519  | 38.519 | 5 |        |        |        | 18.519 |        |        | 28.148 | 38.519 | 2.222  |        |        |        |        |        | 12.593 |        |
| 484 V 60.000  | 60     | 8 |        |        |        |        |        |        | 7.407  | 14.074 |        | 17.037 |        |        |        |        | 60     |        |
| 485 A 85.926  | 85.926 | 9 |        |        |        |        |        |        |        |        |        |        |        |        | 14.074 |        |        |        |
| 486 L 85.185  | 85.185 | 8 |        |        |        |        |        |        | 4.444  | 85.185 | 10.37  |        |        |        |        |        |        |        |
| 487 T 58.519  | 58.519 | 8 |        | 0.741  |        |        | 0.741  |        | 28.148 | 0.741  |        |        |        |        | 5.926  | 58.519 | 5.185  |        |
| 488 L 88.889  | 88.889 | 8 |        |        |        | 9.63   |        |        | 0.741  | 88.889 | 0.741  |        |        |        |        |        |        |        |
| 489 T 57.778  | 57.778 | 9 | 0.741  |        |        |        |        | 0.741  |        |        |        |        |        |        | 40.741 | 57.778 |        |        |
| 490 P 100.000 | 100    | 9 |        |        |        |        |        |        |        |        |        |        | 100    |        |        |        |        |        |
| 491 A 77.037  | 77.037 | 9 | 77.037 |        |        |        |        |        | 0.741  | 0.741  | 17.778 |        |        |        |        | 1.481  | 2.222  |        |
| 492 L 77.778  | 77.778 | 9 |        |        |        |        |        |        | 0.741  | 77.778 | 20.741 |        |        |        | 0.741  |        |        |        |
| 493 C 73.333  | 73.333 | 8 | 11.852 | 73.333 |        |        | 0.741  |        |        |        |        |        |        |        | 14.074 |        |        |        |
| 494 A 74.074  | 74.074 | 7 | 74.074 |        |        |        | 2.222  |        |        |        |        |        |        |        | 0.741  | 0.741  | 17.037 | 4.444  |
| 495 T 48.148  | 48.148 | 5 | 3.704  |        |        |        | 0.741  |        | 2.222  | 11.111 | 14.815 | 1.481  | 0.741  |        | 5.185  | 3.704  | 48.148 | 6.667  |
| 496 L 61.481  | 61.481 | 4 |        |        |        | 5.926  |        |        | 8.148  | 61.481 | 20     |        |        |        |        |        | 3.704  | 0.741  |
| 497 L 97.037  | 97.037 | 9 |        |        |        |        |        |        | 1.481  | 97.037 | 0.741  |        |        |        |        | 0.741  |        |        |
| 498 K 77.778  | 77.778 | 6 |        |        |        |        |        |        |        | 0.741  |        |        |        |        |        |        |        |        |
| 499 P 58.955  | 58.955 | 1 | 10.448 | 0.746  | 0.741  |        | 1.481  | 0.741  | 77.778 |        |        |        | 1.481  | 0.741  | 1.481  | 10.37  | 2.963  | 1.481  |
| 500 H 18.797  | 18.797 | 1 | 6.015  |        | 1.504  | 4.478  | 2.985  | 5.224  | 2.985  |        |        |        | 0.746  | 58.955 | 2.985  | 2.239  | 3.731  | 2.239  |
| 501 A 15.625  | 15.625 | 1 | 15.625 |        | 14.844 | 7.031  | 9.023  | 18.797 | 18.045 | 1.504  | 7.519  |        | 6.015  | 2.256  | 1.504  | 3.759  | 3.008  | 3.008  |
| 502 K 36.082  | 36.082 | 1 | 21.649 |        | 2.062  | 8.247  | 6.186  | 6.186  | 1.031  | 36.082 |        | 1.031  | 2.062  | 5.155  | 1.031  | 4.124  | 1.031  | 3.093  |
| 503 G 55.128  | 55.128 | 1 | 1.282  |        | 11.538 | 11.538 | 55.128 | 3.846  |        | 3.846  |        | 1.282  | 2.564  |        | 2.564  | 1.282  | 1.282  | 3.846  |
| 504 E 20.779  | 20.779 | 1 | 7.792  |        | 15.584 | 20.779 | 10.39  | 16.883 | 1.299  | 11.688 | 1.299  | 1.299  | 1.299  | 2.597  | 1.299  | 6.494  |        | 1.299  |
| 505 H 38.889  | 38.889 | 2 |        |        | 3.968  | 6.349  | 0.794  | 2.381  | 38.889 | 13.492 | 0.794  |        | 6.349  | 11.111 | 7.143  | 1.587  | 4.762  | 1.587  |
| 506 H 22.689  | 22.689 | 1 | 1.681  |        | 1.681  | 5.882  | 0.84   | 16.807 | 22.689 | 15.966 |        | 5.042  | 17.647 | 1.681  |        | 6.723  | 3.361  |        |
| 507 E 19.512  | 19.512 | 1 | 6.504  |        | 13.008 | 19.512 |        | 14.634 | 1.626  | 3.252  | 8.943  | 0.813  | 8.13   | 0.813  | 2.439  | 2.439  | 9.756  | 1.626  |
| 508 L 20.000  | 20     | 1 | 15     |        | 2.5    |        | 7.5    | 12.5   | 2.5    | 7.5    | 10     |        | 5      | 7.5    |        |        | 2.5    | 2.5    |
| 509 K 42.500  | 42.5   | 1 |        |        | 1.25   | 2.5    |        | 1.25   | 1.25   | 7.5    | 42.5   | 8.75   |        | 1.25   | 12.5   | 8.75   | 1.25   | 5      |
| 510 K 23.333  | 23.333 | 1 | 3.333  |        | 13.333 | 1.111  |        | 8.889  | 1.111  | 23.333 |        | 6.667  | 1.111  |        | 16.667 | 3.333  | 20     | 1.111  |
| 511 G 74.444  | 74.444 | 4 | 1.111  |        |        | 1.111  |        | 74.444 |        | 6.667  |        | 1.111  | 2.222  |        | 8.889  | 4.444  |        |        |
| 512 F 65.649  | 65.649 | 5 |        |        |        |        | 65.649 | 0.763  |        | 3.817  | 16.031 | 3.817  |        | 1.527  |        |        | 3.817  | 3.053  |
| 513 F 69.403  | 69.403 | 7 | 6.716  |        | 7.463  | 69.403 | 1.493  |        |        |        | 5.97   |        | 0.746  |        |        | 2.985  | 2.985  | 0.746  |
| 514 G 45.185  | 45.185 | 1 | 10.37  |        | 1.481  |        | 45.185 | 2.963  | 2.963  | 3.704  | 0.741  |        | 2.222  | 0.741  | 4.444  | 17.778 | 3.704  | 1.481  |
| 515 W 46.667  | 46.667 | 1 | 6.667  | 1.481  |        | 1.481  | 8.889  |        | 3.704  | 2.963  | 2.963  | 0.741  | 11.111 | 0.741  | 5.185  | 0.741  | 4.444  | 1.481  |
| 516 F 77.612  | 77.612 | 8 | 2.239  |        |        | 77.612 |        |        | 4.478  | 6.716  |        |        |        |        |        | 0.746  | 8.209  | 46.667 |
| 517 N 74.815  | 74.815 | 7 | 2.222  |        | 10.37  | 10.37  |        | 0.741  | 1.481  |        |        |        | 74.815 |        |        |        |        |        |
| 518 R 62.963  | 62.963 | 3 | 2.963  |        |        | 1.481  |        | 0.741  | 5.185  | 7.407  | 0.741  | 0.741  | 3.704  |        | 2.963  | 62.963 | 2.222  | 5.926  |
| 519 GL 14.074 | 14.074 | 1 | 5.185  |        |        |        | 11.852 | 14.074 | 0.741  | 4.444  | 2.963  | 14.074 | 12.593 | 2.963  | 1.481  | 5.926  | 4.444  | 10.37  |
| 520 F 78.519  | 78.519 | 8 |        |        |        | 78.519 |        |        | 2.222  |        |        | 11.111 | 0.741  |        |        |        | 1.481  | 7.407  |
| 521 D 34.815  | 34.815 | 1 | 4.444  |        | 34.815 | 28.148 |        | 3.704  | 1.481  | 1.481  |        |        | 14.074 |        | 0.741  | 4.444  | 4.444  |        |
| 522 R 40.741  | 40.741 | 1 | 2.963  |        |        |        |        | 4.444  | 3.704  | 28.148 |        |        | 1.481  | 0.741  | 3.704  | 40.741 | 8.148  | 3.704  |
| 523 S 26.667  | 26.667 | 3 | 9.63   |        |        |        | 4.444  | 2.963  |        | 5.185  |        | 22.963 | 8.148  |        | 5.926  | 26.667 | 5.926  | 6.667  |
| 524 T 38.519  | 38.519 | 5 | 13.333 | 0.741  |        | 1.481  |        | 0.741  |        | 5.926  |        |        | 4.444  | 0.741  | 3.704  | 4.444  | 19.259 | 38.519 |
| 525 H 20.741  | 20.741 | 1 | 3.704  |        | 7.407  | 11.111 |        | 8.889  | 20.741 | 3.704  | 2.222  |        | 14.074 |        | 8.148  | 11.111 | 4.444  | 2.963  |
| 526 R 27.407  | 27.407 | 1 | 5.926  | 0.741  |        |        | 2.222  | 25.926 | 18.519 | 6.667  | 1.481  |        |        | 0.741  | 27.407 | 3.704  | 1.481  | 2.222  |
| 527 Y 96.296  | 96.296 | 9 | 0.741  |        |        | 1.481  |        |        |        |        | 0.741  |        |        |        |        |        | 0.741  | 96.296 |
| 528 T 20.000  | 20     | 1 | 3.704  |        | 0.741  | 17.037 | 0.741  | 8.148  | 0.741  | 2.222  | 1.481  | 0.741  | 0.741  |        | 18.519 | 2.963  | 10.37  | 20     |
| 529 R 24.444  | 24.444 | 1 | 5.926  |        | 11.852 | 2.222  |        | 12.593 | 1.481  | 0.741  | 11.111 | 2.963  |        | 11.111 | 2.222  | 24.444 | 6.667  | 1.481  |
| 530 G 22.222  | 22.222 | 1 | 7.407  | 0.741  |        | 0.741  | 3.704  | 22.222 | 0.741  | 4.444  | 1.481  |        | 6.667  |        | 1.481  | 6.667  | 20     | 5.185  |
| 531 V 63.704  | 63.704 | 8 | 0.741  | 0.741  |        | 0.741  |        |        |        | 6.667  |        | 23.704 |        |        |        |        |        | 1.481  |
| 532 G 29.630  | 29.63  | 1 | 19.259 |        | 5.926  | 2.963  |        | 29.63  | 6.667  | 2.963  | 1.481  |        | 2.222  | 11.111 | 11.111 | 2.963  | 0.741  |        |
| 533 K 18.519  | 18.519 | 1 | 4.444  |        |        | 1.481  | 8.148  | 13.333 | 7.407  | 18.519 | 2.963  | 0.741  | 10.37  |        | 2.222  | 17.037 | 5.926  | 0.741  |
| 534 I 34.815  | 34.815 | 3 | 7.407  |        |        |        | 1.481  |        |        | 34.815 | 18.519 | 8.148  |        |        | 3.704  | 5.926  | 19.259 | 0.741  |
| 535 L 61.481  | 61.481 | 5 |        |        |        |        | 2.963  |        |        | 13.333 | 61.481 | 6.667  | 1.481  |        | 0.741  | 1.481  | 11.852 |        |
| 536 R 35.556  | 35.556 | 1 | 5.926  |        | 2.963  | 2.222  |        | 10.37  | 8.889  |        |        | 0.741  | 6.667  |        | 4.444  | 35.556 | 3.704  | 4.444  |
| 537 R 34.815  | 34.815 | 1 | 2.222  |        | 0.741  |        | 2.222  | 7.407  | 11.111 | 11.111 | 0.741  | 2.222  |        |        | 2.222  | 34.815 | 2.963  | 1.481  |
| 538 RS 24.444 | 24.444 | 4 | 3.704  |        |        | 0.741  | 6.667  |        |        | 8.148  | 2.222  |        |        | 5.926  | 2.222  | 24.444 | 24.444 | 20.741 |
| 539 G 37.778  | 37.778 | 1 | 5.185  |        |        | 0.741  | 2.963  | 37.778 | 0.741  | 2.963  | 3.704  | 10.37  | 1.481  |        | 8.148  | 3.704  | 2.963  | 10.37  |
| 540 R 45.926  | 45.926 | 3 | 6.667  | 0.741  |        |        | 1.481  | 0.741  |        | 8.889  | 0.741  | 11.852 | 1.481  |        | 4.444  | 1.481  | 45.926 | 3.704  |
| 541 Y 27.407  | 27.407 | 3 | 7.407  |        |        |        | 7.407  | 2.963  |        | 4.444  |        | 0.741  | 12.593 |        |        | 2.963  | 3.704  | 20.741 |
| 542 L 44.444  | 44.444 | 4 |        | 0.741  |        |        | 5.185  | 6.667  |        | 8.889  | 44.444 | 20.741 |        |        | 1.481  |        | 8.148  | 0.741  |
| 543 L 37.037  | 37.037 | 1 |        |        | 9.63   |        | 3.704  | 6.667  |        | 7.407  | 37.037 | 4.444  |        |        | 0.741  | 2.222  | 28.148 |        |
| 544 I 31.111  | 31.111 | 2 |        |        | 8.148  |        | 13.333 | 1.481  |        | 31.111 | 20.741 | 1.481  |        |        |        |        | 21.481 |        |
| 545 Y 60.741  | 60.741 | 6 | 15.556 |        |        |        | 11.111 | 2.222  |        | 0.741  | 2.222  |        |        |        |        | 0.741  | 3.704  | 2.963  |
| 546 L 31.852  | 31.852 | 1 | 20.741 | 0.741  |        |        | 2.963  | 11.852 |        | 5.926  | 31.852 | 1.481  |        |        |        | 0.741  | 23.704 |        |
| 547 L 31.111  | 31.111 | 1 | 14.074 |        |        |        | 1.481  | 15.556 |        | 14.815 | 31.111 |        |        |        | 0.741  | 1.481  | 20.741 |        |



|               |        |   |        |        |        |        |        |        |        |        |        |        |        |        |        |        |        |        |        |        |        |        |
|---------------|--------|---|--------|--------|--------|--------|--------|--------|--------|--------|--------|--------|--------|--------|--------|--------|--------|--------|--------|--------|--------|--------|
| 548 L 37.778  | 37.778 | 4 | 2.963  |        |        |        | 2.963  |        |        | 34.074 |        | 37.778 | 4.444  |        |        |        | 0.741  | 0.741  | 16.296 |        |        |        |
| 549 V 36.296  | 36.296 | 3 | 4.444  | 5.185  |        |        | 6.667  | 0.741  |        | 8.889  |        | 28.148 | 3.704  |        |        |        | 2.963  | 2.963  | 36.296 |        |        |        |
| 550 V 30.370  | 30.37  | 1 | 20.741 | 2.963  |        |        | 0.741  | 28.148 |        | 7.407  |        | 7.407  | 0.741  |        |        |        | 1.481  |        | 30.37  |        |        |        |
| 551 G 34.074  | 34.074 | 1 | 12.593 | 0.741  |        |        |        | 34.074 |        | 5.185  |        | 20     | 2.222  |        |        |        | 9.63   | 2.222  | 13.333 |        |        |        |
| 552 M 31.111  | 31.111 | 4 | 5.926  | 5.185  |        |        |        | 3.704  |        | 4.444  |        | 23.704 | 31.111 |        |        |        | 0.741  | 19.259 | 5.926  |        |        |        |
| 553 A 24.444  | 24.444 | 1 | 24.444 | 1.481  |        |        |        | 20.741 |        | 5.185  |        |        |        | 11.111 |        |        | 0.741  | 18.519 | 3.704  | 7.407  |        |        |
| 554 F 22.963  | 22.963 | 1 | 2.963  |        |        |        | 22.963 | 3.704  | 0.741  | 5.926  | 1.481  | 19.259 | 0.741  | 0.741  | 2.222  |        | 0.741  | 17.778 | 11.111 | 9.63   |        |        |
| 555 L 57.778  | 57.778 | 2 | 5.185  |        |        | 0.741  |        | 3.704  | 11.111 | 4.444  |        | 57.778 | 10.37  |        |        | 1.481  | 0.741  | 2.222  |        |        |        |        |
| 556 F 65.926  | 65.926 | 5 | 2.963  |        |        |        | 65.926 |        |        | 0.741  |        | 8.148  | 2.222  |        |        |        | 1.481  | 0.741  | 0.741  | 16.296 |        |        |
| 557 L 17.778  | 17.778 | 1 | 2.222  |        | 0.741  | 0.741  | 1.481  | 1.481  | 1.481  | 6.667  | 8.889  | 17.778 | 12.593 | 3.704  |        | 5.185  | 1.481  | 11.111 | 11.852 | 8.889  | 2.963  | 0.741  |
| 558 R 44.444  | 44.444 | 1 | 4.444  |        |        | 0.741  | 4.444  | 0.741  |        | 0.741  | 6.667  | 4.444  | 2.222  | 3.704  |        | 6.667  | 44.444 | 12.593 | 3.704  | 0.741  | 2.222  |        |
| 559 L 51.111  | 51.111 | 6 | 0.741  |        |        |        |        |        |        | 11.111 |        | 51.111 | 6.667  |        |        | 1.481  |        | 6.667  | 11.111 | 10.37  | 0.741  |        |
| 560 P 85.185  | 85.185 | 6 | 2.222  |        |        |        |        |        | 0.741  |        | 3.704  |        |        | 0.741  | 85.185 | 2.963  |        | 3.704  | 0.741  |        |        |        |
| 561 T 35.556  | 35.556 | 2 | 3.704  |        | 0.741  | 2.222  |        | 13.333 | 0.741  |        | 8.148  |        | 0.741  | 2.222  | 1.481  | 1.481  | 2.222  | 25.926 | 35.556 | 1.481  |        |        |
| 562 S 38.519  | 38.519 | 6 | 18.519 |        | 0.741  | 20.741 |        | 20.741 |        | 0.741  |        |        |        |        |        |        |        | 38.519 |        |        |        |        |
| 563 F 75.556  | 75.556 | 8 |        |        |        |        | 75.556 |        |        |        |        | 21.481 |        |        |        |        |        |        | 1.481  | 0.741  |        | 0.741  |
| 564 L 55.556  | 55.556 | 8 | 16.296 |        |        |        | 0.741  |        |        | 8.889  |        | 55.556 | 0.741  |        |        |        |        | 2.222  | 15.556 |        |        |        |
| 565 P 99.259  | 99.259 | 9 |        |        |        |        |        |        |        |        |        |        |        |        |        |        | 0.741  |        |        |        |        |        |
| 566 DE 20.741 | 20.741 | 1 | 7.407  |        | 20.741 | 20.741 |        | 1.481  |        | 0.741  | 2.222  | 5.926  | 1.481  | 6.667  | 3.704  | 99.259 | 0.741  | 2.222  | 14.074 | 2.222  |        |        |
| 567 E 86.667  | 86.667 | 9 |        |        | 0.741  | 86.667 |        |        |        |        |        |        |        |        | 12.593 |        | 0.741  |        |        |        |        |        |
| 568 D 100.000 | 100    | 9 |        |        | 100    |        |        |        |        |        |        |        |        |        |        |        |        |        |        |        |        |        |
| 569 Q 68.889  | 68.889 | 8 |        |        |        |        |        |        |        | 0.741  | 17.778 | 1.481  | 0.741  |        |        | 68.889 | 9.63   | 0.741  |        |        |        |        |
| 570 G 84.444  | 84.444 | 8 | 2.963  |        |        |        |        | 84.444 |        |        |        | 2.963  |        |        |        | 7.407  |        | 0.741  |        |        |        | 1.481  |
| 571 V 28.889  | 28.889 | 3 | 5.185  | 2.222  | 0.741  |        | 9.63   | 0.741  |        | 12.593 |        | 1.481  | 5.185  |        |        |        | 0.741  | 0.741  | 4.444  | 28.889 | 0.741  | 26.667 |
| 572 L 34.815  | 34.815 | 4 | 2.963  |        |        |        | 30.37  |        |        | 8.148  |        | 34.815 | 5.185  |        |        |        |        | 0.741  | 1.481  | 14.815 |        | 1.481  |
| 573 M 23.704  | 23.704 | 5 | 0.741  |        | 0.741  |        | 20.741 | 0.741  |        | 12.593 |        | 22.222 | 23.704 | 0.741  |        | 0.741  |        |        | 4.444  | 11.852 |        | 0.741  |
| 574 T 34.074  | 34.074 | 4 | 17.037 |        |        |        | 1.481  | 7.407  |        | 2.963  |        | 1.481  | 2.963  | 2.963  |        |        |        | 8.148  | 34.074 | 20.741 |        | 0.741  |
| 575 M 25.926  | 25.926 | 5 | 7.407  |        | 5.185  | 0.741  | 6.667  | 2.963  |        | 10.37  |        | 5.185  | 25.926 | 1.481  |        | 16.296 | 0.741  | 13.333 | 1.481  | 1.481  |        | 0.741  |
| 576 V 43.704  | 43.704 | 4 | 21.481 |        |        |        | 2.222  | 4.444  |        | 16.296 |        | 1.481  | 1.481  |        |        |        |        | 2.963  | 1.481  | 43.704 |        | 4.444  |
| 577 Q 60.741  | 60.741 | 5 | 0.741  |        | 0.741  | 2.222  | 0.741  |        |        | 2.222  | 7.407  | 2.963  | 2.222  | 4.444  | 0.741  | 60.741 | 1.481  | 3.704  | 9.63   |        |        |        |
| 578 L 69.630  | 69.63  | 7 | 12.593 |        |        |        |        | 3.704  |        | 69.63  |        | 4.444  | 0.741  |        |        | 0.741  |        | 3.704  | 3.704  |        |        |        |
| 579 P 94.815  | 94.815 | 8 | 1.481  |        | 0.741  |        |        |        |        |        |        |        |        |        |        | 94.815 | 0.741  | 1.481  |        | 0.741  |        |        |
| 580 A 30.370  | 30.37  | 4 | 30.37  | 14.074 | 6.667  |        |        |        |        |        |        |        |        | 2.222  |        | 11.852 | 6.667  | 17.037 | 4.444  | 6.667  |        |        |
| 581 G 62.222  | 62.222 | 6 | 10.37  | 3.704  | 0.741  |        |        | 62.222 | 2.222  |        |        | 8.889  |        |        |        | 2.222  |        | 3.704  | 4.444  |        |        | 1.481  |
| 582 A 67.407  | 67.407 | 7 | 67.407 | 0.741  |        |        |        |        |        |        |        |        |        |        |        |        |        | 25.185 | 2.963  | 3.704  |        |        |
| 583 T 53.333  | 53.333 | 8 | 1.481  |        | 0.741  |        |        | 0.741  |        |        |        |        | 10.37  |        | 0.741  |        |        | 32.593 | 53.333 |        |        |        |
| 584 L 35.556  | 35.556 | 3 | 7.407  | 1.481  | 2.222  | 0.741  |        |        | 0.741  | 5.926  | 4.444  | 35.556 | 3.704  | 0.741  |        | 24.444 | 3.704  | 0.741  | 2.963  |        | 1.481  |        |
| 585 E 36.296  | 36.296 | 2 | 7.407  |        | 25.926 | 36.296 |        | 2.963  |        | 0.741  |        |        | 0.741  | 4.444  |        | 10.37  |        | 5.926  | 3.704  | 1.481  |        |        |
| 586 R 62.963  | 62.963 | 7 |        |        | 1.481  |        |        |        | 0.741  |        |        |        | 0.741  | 0.741  |        | 14.815 | 62.963 | 1.481  | 0.741  |        | 16.296 |        |
| 587 T 77.037  | 77.037 | 8 | 2.963  |        | 0.741  |        |        |        | 0.741  | 5.185  | 0.741  | 4.444  | 0.741  | 0.741  |        |        |        | 2.963  | 77.037 | 3.704  |        |        |
| 588 Q 24.444  | 24.444 | 1 | 3.704  | 13.333 | 19.259 |        |        | 2.222  |        | 2.222  | 2.222  | 14.074 | 2.963  | 6.667  |        | 24.444 | 3.704  | 3.704  | 2.963  |        | 0.741  |        |
| 589 A 26.667  | 26.667 | 1 | 26.667 | 7.407  | 10.37  |        | 0.741  | 2.222  | 3.704  | 1.481  | 23.704 | 1.481  | 5.926  |        | 7.407  | 3.704  | 0.741  | 1.481  | 2.963  |        |        |        |
| 590 V 65.926  | 65.926 | 6 | 4.444  |        |        |        | 3.704  | 0.741  | 1.481  | 1.481  | 0.741  | 1.481  | 1.481  | 2.222  |        | 0.741  | 1.481  | 6.667  | 65.926 |        | 7.407  |        |
| 591 L 25.185  | 25.185 | 3 | 6.667  |        |        |        | 1.481  | 4.444  |        | 14.074 |        | 25.185 | 11.852 | 2.222  |        |        | 1.481  | 2.963  | 8.148  | 21.481 |        |        |
| 592 D 25.926  | 25.926 | 1 | 9.63   | 25.926 | 17.037 |        |        | 2.222  | 1.481  | 0.741  | 14.074 | 0.741  |        | 5.926  |        | 7.407  | 11.111 | 3.704  |        |        |        |        |
| 593 Q 27.407  | 27.407 | 1 | 8.148  | 4.444  | 21.481 |        |        |        | 0.741  | 0.741  | 22.222 |        |        |        | 2.963  | 27.407 | 5.926  | 0.741  | 3.704  | 1.481  |        |        |
| 594 V 35.556  | 35.556 | 3 | 6.667  |        |        |        | 8.889  |        |        | 11.111 |        | 10.37  | 20.741 |        |        |        |        |        | 1.481  | 35.556 |        | 5.185  |
| 595 E 32.593  | 32.593 | 2 | 3.704  | 4.444  | 32.593 |        | 1.481  |        | 1.481  | 0.741  |        |        | 8.889  |        |        | 3.704  | 8.148  | 12.593 | 17.778 | 1.481  |        | 0.741  |
| 596 D 22.963  | 22.963 | 1 | 9.63   | 22.963 | 11.111 |        |        | 2.963  | 6.667  | 2.963  | 11.852 |        | 11.852 | 1.481  |        | 13.333 | 4.444  | 2.963  | 0.741  |        |        |        |
| 597 Y 39.259  | 39.259 | 2 | 2.222  | 0.741  | 1.481  |        | 3.704  |        | 8.889  | 20.741 | 2.963  | 2.963  | 2.222  |        | 1.481  | 0.741  | 0.741  | 2.963  | 4.444  | 1.481  | 39.259 | 22.963 |
| 598 F 23.704  | 23.704 | 2 | 11.852 |        |        |        | 23.704 | 2.963  |        | 8.148  |        | 20     | 2.222  | 1.481  |        |        | 0.741  | 0.741  | 0.741  | 5.926  |        |        |
| 599 L 47.407  | 47.407 | 1 | 8.889  |        | 3.704  | 3.704  |        | 2.222  |        |        | 7.407  | 47.407 | 10.37  | 1.481  |        | 2.222  | 1.481  | 3.704  | 2.963  | 0.741  |        |        |
| 600 T 18.519  | 18.519 | 1 | 6.667  | 5.185  | 16.296 |        |        | 1.481  | 0.741  |        | 11.111 |        |        | 14.815 |        | 7.407  | 2.222  | 14.815 | 18.519 | 0.741  |        |        |
| 601 Q 18.182  | 18.182 | 1 | 3.306  | 8.264  | 9.917  | 6.612  |        | 9.091  | 5.785  | 10.744 | 3.306  |        | 12.397 | 0.826  |        | 18.182 |        | 7.438  | 4.132  |        |        |        |
| 602 E 94.545  | 94.545 | 9 |        |        | 94.545 |        |        |        |        |        |        |        |        |        |        | 5.455  |        |        |        |        |        |        |
| 603 K 63.768  | 63.768 | 3 | 5.797  |        | 2.899  |        | 5.797  | 1.449  | 1.449  | 63.768 |        |        | 1.449  |        |        | 2.899  | 11.594 | 2.899  |        |        |        |        |
| 604 P 39.552  | 39.552 | 1 | 11.94  | 26.866 | 9.701  |        | 1.493  |        | 1.493  | 2.239  |        |        |        |        | 39.552 | 1.493  |        | 1.493  |        |        |        |        |
| 605 N 28.148  | 28.148 | 4 | 16.296 | 0.741  | 20     |        | 22.963 |        |        |        |        | 2.222  |        |        | 28.148 |        | 0.741  | 2.222  | 3.704  | 2.222  |        |        |
| 606 V 68.148  | 68.148 | 7 | 0.741  |        |        |        | 1.481  |        |        | 12.593 | 0.741  | 1.481  | 2.222  | 0.741  |        |        | 1.481  | 0.741  | 5.185  | 68.148 |        | 4.444  |
| 607 E 28.148  | 28.148 | 1 | 19.259 | 9.63   | 28.148 |        |        | 3.704  | 0.741  |        | 8.889  | 2.963  | 2.963  | 4.444  |        | 2.963  | 2.222  | 4.444  | 2.963  |        | 2.222  |        |
| 608 S 51.111  | 51.111 | 4 | 3.704  | 11.111 | 2.222  | 4.444  | 5.185  | 3.704  |        |        | 0.741  |        |        |        |        | 0.741  | 51.111 | 3.704  | 0.741  |        | 2.963  |        |
| 609 V 44.444  | 44.444 | 5 | 7.407  |        |        |        | 1.481  | 0.741  |        | 11.852 |        | 1.481  | 2.963  | 6.667  |        |        | 0.741  | 8.889  | 10.37  | 44.444 |        | 2.222  |
| 610 F 49.630  | 49.63  | 5 | 0.741  |        |        |        | 49.63  |        |        | 11.111 |        | 7.407  | 5.185  | 0.741  |        | 3.704  |        |        | 4.444  | 11.852 | 2.963  | 2.222  |
| 611 T 33.333  | 33.333 | 5 | 23.704 |        |        |        |        |        |        | 6.667  | 0.741  | 2.222  |        |        |        | 8.889  |        | 16.296 | 33.333 | 5.926  |        |        |
| 612 V 44.444  | 44.444 | 6 | 0.741  |        |        | 17.778 |        |        |        | 22.963 |        | 4.444  | 0.741  |        | 0.741  |        |        | 7.407  | 44.444 |        | 0.741  |        |
| 613 N 22.222  | 22.222 | 3 | 13.333 |        | 1.481  |        |        | 0.741  |        |        |        | 8.148  | 0.741  | 22.222 | 11.852 | 2.222  |        | 17.778 | 9.63   | 7.407  |        |        |
| 614 G 93.333  | 93.333 | 8 |        | 0.741  | 0.741  | 2.222  |        | 93.333 |        |        |        | 0.741  | 1.481  |        |        |        |        | 0.741  |        |        |        |        |
| 615 F 59.848  | 59.848 | 6 | 3.788  | 0.758  |        |        |        | 1.515  |        | 3.03   |        | 12.121 |        |        |        | 0.758  |        | 7.576  | 3.788  | 1.515  | 1.515  | 3.788  |
| 616 S 42.308  | 42.308 | 6 | 0.769  | 6.154  |        |        |        |        |        |        |        |        |        |        |        |        |        |        |        |        |        |        |

|               |        |   |        |        |        |        |        |        |        |        |        |        |        |        |        |        |        |        |        |  |
|---------------|--------|---|--------|--------|--------|--------|--------|--------|--------|--------|--------|--------|--------|--------|--------|--------|--------|--------|--------|--|
| 617 F 52.344  | 52.344 | 5 | 3.125  |        |        | 52.344 | 9.375  |        | 8.594  |        | 5.469  | 0.781  | 3.125  | 8.594  |        | 2.344  | 1.562  | 4.688  |        |  |
| 618 S 26.357  | 26.357 | 4 | 22.481 | 2.326  |        | 0.775  | 7.752  |        | 2.326  | 0.775  | 11.628 | 0.775  | 13.178 | 2.326  |        | 26.357 | 3.101  | 5.426  | 0.775  |  |
| 619 G 72.222  | 72.222 | 7 | 6.481  |        |        |        | 72.222 |        |        |        |        |        | 0.926  |        | 0.926  | 1.852  | 12.037 | 5.556  |        |  |
| 620 N 29.630  | 29.63  | 5 | 6.481  | 0.926  |        |        | 1.852  |        | 0.926  |        | 2.778  | 1.852  | 29.63  |        | 14.815 | 18.519 | 19.444 | 0.926  | 0.926  |  |
| 621 G 67.290  | 67.29  | 6 | 5.607  |        |        |        | 67.29  |        | 0.935  | 1.869  | 1.869  |        |        |        | 1.869  | 1.869  | 14.019 | 3.738  | 0.935  |  |
| 622 Q 56.410  | 56.41  | 7 | 1.709  | 1.709  | 1.709  |        | 0.855  |        |        |        |        |        | 5.128  | 21.368 | 56.41  | 7.692  | 3.419  |        |        |  |
| 623 N 84.252  | 84.252 | 8 | 3.937  | 0.787  |        |        | 0.787  |        |        |        |        |        | 84.252 |        |        | 8.661  | 0.787  | 0.787  |        |  |
| 624 A 29.323  | 29.323 | 3 | 29.323 |        |        | 0.752  | 7.519  |        |        |        |        | 6.015  | 3.759  |        | 5.263  | 21.805 | 14.286 | 11.278 |        |  |
| 625 G 60.902  | 60.902 | 6 | 27.82  | 0.752  |        |        | 60.902 |        |        |        | 2.256  | 0.752  |        | 0.752  |        | 4.511  |        | 2.256  |        |  |
| 626 I 25.373  | 25.373 | 4 | 1.493  |        |        | 13.433 | 0.746  | 25.373 |        |        | 18.657 | 18.657 | 0.746  |        | 0.746  | 7.463  | 2.239  | 4.478  | 5.97   |  |
| 627 A 42.424  | 42.424 | 4 | 42.424 |        |        | 0.758  | 17.424 | 6.061  |        |        | 5.303  | 5.303  | 1.515  |        |        | 6.061  | 1.515  | 13.636 |        |  |
| 628 F 74.074  | 74.074 | 8 | 0.741  |        |        | 74.074 | 11.852 | 0.741  | 8.148  |        |        |        |        |        |        | 0.741  | 0.741  | 1.481  | 1.481  |  |
| 629 V 41.481  | 41.481 | 5 | 7.407  |        |        | 6.667  |        | 21.481 |        |        | 3.704  | 5.185  |        | 2.963  |        |        |        | 11.111 | 41.481 |  |
| 630 S 20.741  | 20.741 | 2 | 4.444  | 0.741  |        |        | 2.222  | 5.926  | 6.667  | 4.444  | 8.889  | 8.148  | 6.667  |        |        | 11.111 | 20.741 | 14.815 | 5.185  |  |
| 631 L 87.407  | 87.407 | 8 |        |        |        | 5.926  |        |        |        | 87.407 | 4.444  |        |        |        | 0.741  |        |        | 1.481  | 1.481  |  |
| 632 K 77.037  | 77.037 | 6 | 4.444  | 3.704  | 1.481  |        |        |        |        | 77.037 | 0.741  |        |        | 2.963  | 0.741  | 2.222  | 2.222  | 2.222  | 2.222  |  |
| 633 D 49.630  | 49.63  | 4 | 1.481  | 49.63  | 0.741  |        | 1.481  | 1.481  |        |        |        |        |        | 4.444  | 35.556 | 0.741  | 2.963  | 0.741  | 0.741  |  |
| 634 W 81.481  | 81.481 | 8 | 0.741  |        |        | 15.556 |        | 0.741  |        |        | 0.741  |        |        |        | 0.741  |        |        |        | 81.481 |  |
| 635 S 35.556  | 35.556 | 2 | 8.889  | 22.222 | 14.815 |        | 5.926  |        | 5.926  |        |        |        | 4.444  |        | 2.222  | 35.556 |        |        |        |  |
| 636 E 60.000  | 60     | 3 | 2.963  | 10.37  | 60     |        | 0.741  |        | 3.704  | 1.481  |        |        | 0.741  |        | 17.037 | 0.741  | 0.741  | 1.481  |        |  |
| 637 R 100.000 | 100    | 9 |        |        |        |        |        |        |        |        |        |        |        |        |        | 100    |        |        |        |  |
| 638 E 15.556  | 15.556 | 1 | 0.741  | 11.852 | 15.556 |        | 2.963  | 2.963  | 14.074 | 0.741  |        | 5.185  | 13.333 | 5.185  | 2.963  | 9.63   | 13.333 | 0.741  | 0.741  |  |
| 639 G 34.615  | 34.615 | 1 | 8.462  | 7.692  | 6.154  | 0.769  | 34.615 | 0.769  | 1.538  | 5.385  | 0.769  |        | 2.308  | 2.308  | 16.154 | 6.923  | 3.846  | 0.769  | 1.538  |  |
| 640 S 24.444  | 24.444 | 1 | 12.593 | 9.63   | 11.852 |        | 1.481  | 0.741  | 0.741  | 7.407  | 0.741  | 2.222  | 1.481  | 14.815 | 1.481  | 2.963  | 24.444 | 7.407  |        |  |
| 641 E 24.603  | 24.603 | 1 | 9.524  | 10.317 | 24.603 |        | 7.937  | 0.794  | 1.587  | 3.175  |        |        | 1.587  | 1.587  | 15.079 | 1.587  | 7.937  | 11.111 | 3.175  |  |
| 642 N 29.921  | 29.921 | 2 | 9.449  | 5.512  | 2.362  | 3.15   | 5.512  |        | 0.787  | 3.15   | 11.811 | 4.724  | 29.921 | 13.386 | 0.787  | 7.874  | 0.787  | 0.787  |        |  |
| 643 S 26.446  | 26.446 | 2 | 4.959  | 8.264  | 12.397 |        | 7.438  | 1.653  | 0.826  | 13.223 |        |        | 1.653  | 0.826  | 9.091  | 26.446 | 11.57  | 1.653  |        |  |
| 644 A 38.000  | 38     | 5 | 38     | 1      |        |        |        | 1      | 4      |        | 7      | 1      |        |        |        | 12     |        | 34     | 1      |  |
| 645 F 16.346  | 16.346 | 1 | 15.385 | 4.808  | 13.462 | 16.346 | 6.731  | 0.962  | 0.962  | 0.962  | 2.885  | 7.692  | 6.731  | 10.577 | 1.923  | 4.808  | 3.846  | 1.923  |        |  |
| 646 A 61.905  | 61.905 | 4 | 61.905 | 4.762  | 5.714  | 0.952  | 2.857  |        | 1.905  |        |        | 1.905  | 1.905  | 5.714  |        | 10.476 | 1.905  |        |        |  |
| 647 I 57.031  | 57.031 | 5 | 1.562  |        | 7.031  | 2.344  |        |        |        | 57.031 | 13.281 | 0.781  |        |        |        | 0.781  |        | 17.188 |        |  |
| 648 A 31.298  | 31.298 | 3 | 31.298 |        | 0.763  |        |        |        | 19.847 | 0.763  | 8.397  | 1.527  | 3.053  |        | 5.344  | 3.053  | 9.16   | 16.031 | 0.763  |  |
| 649 A 25.000  | 25     | 1 | 25     | 4.545  | 12.121 |        | 20.455 | 2.273  | 0.758  | 5.303  | 0.758  | 3.03   | 8.333  | 9.848  | 0.758  | 2.273  | 1.515  |        |        |  |
| 650 R 53.030  | 53.03  | 3 | 9.091  | 4.545  | 9.848  |        |        | 1.515  | 1.515  | 6.061  | 3.788  |        | 1.515  | 0.758  | 4.545  | 53.03  | 0.758  | 2.273  | 0.758  |  |
| 651 A 48.507  | 48.507 | 5 | 48.507 |        |        | 1.493  | 1.493  |        | 11.194 | 26.119 | 2.985  |        | 1.515  |        |        | 0.746  | 0.746  | 5.97   |        |  |
| 652 N 26.119  | 26.119 | 4 | 2.985  | 0.746  |        | 1.493  | 2.239  |        | 0.746  | 0.746  |        | 17.164 | 26.119 |        | 22.388 | 1.493  | 4.478  | 17.164 |        |  |
| 653 G 23.485  | 23.485 | 1 | 21.97  | 0.758  | 2.273  |        | 23.485 |        | 11.364 | 0.758  | 3.788  | 2.273  | 3.788  |        | 17.424 | 6.061  | 1.515  | 2.273  | 2.273  |  |
| 654 A 54.217  | 54.217 | 2 | 54.217 |        | 2.41   | 3.614  |        | 8.434  | 1.205  | 1.205  | 1.205  | 6.024  |        | 2.41   | 6.024  | 2.41   | 1.205  | 2.41   | 7.229  |  |
| 655 F 38.843  | 38.843 | 2 | 2.479  | 0.826  | 4.132  | 38.843 | 1.653  |        | 1.653  | 21.488 | 10.744 | 0.826  | 1.653  | 4.959  | 6.612  | 3.306  |        |        | 0.826  |  |
| 656 S 22.901  | 22.901 | 3 | 10.687 |        | 16.031 |        | 2.29   |        | 5.344  |        | 16.794 | 8.397  | 5.344  | 0.763  | 1.527  | 22.901 | 1.527  | 3.817  | 4.58   |  |
| 657 Q 26.667  | 26.667 | 1 | 9.63   | 8.148  | 5.926  |        | 9.63   | 2.222  | 1.481  | 8.148  | 0.741  | 3.704  | 3.704  | 26.667 | 2.963  | 11.852 | 8.148  | 0.741  |        |  |
| 658 I 66.667  | 66.667 | 6 |        |        |        | 3.704  |        |        | 66.667 | 0.741  | 8.889  | 3.704  | 1.481  | 0.741  |        | 2.222  | 0.741  | 9.63   | 1.481  |  |
| 659 K 28.148  | 28.148 | 1 | 6.667  | 2.963  | 2.963  |        | 2.963  | 0.741  | 28.148 | 0.741  |        | 4.444  | 18.519 | 8.889  | 14.074 | 3.704  | 2.222  | 2.963  |        |  |
| 660 D 39.259  | 39.259 | 4 | 2.222  | 39.259 | 36.296 |        | 17.037 |        | 0.741  |        |        | 0.741  |        | 1.481  |        | 2.222  |        |        |        |  |
| 661 A 54.074  | 54.074 | 5 | 54.074 |        | 0.741  | 23.704 |        |        | 2.222  | 6.667  | 2.963  |        |        | 0.741  | 0.741  | 2.963  |        | 4.444  | 0.741  |  |
| 662 FM 15.556 | 15.556 | 2 | 3.704  | 2.222  | 2.222  | 15.556 |        |        | 2.963  | 3.704  | 8.148  | 15.556 | 6.667  | 14.815 | 6.667  | 6.667  | 5.185  | 0.741  | 5.185  |  |
| 663 V 51.111  | 51.111 | 4 | 10.37  |        |        |        | 1.481  |        | 23.704 | 2.963  | 2.222  | 1.481  | 0.741  |        |        | 1.481  | 4.444  | 51.111 |        |  |
| 664 F 48.889  | 48.889 | 4 | 10.37  |        | 48.889 | 2.222  | 0.741  |        | 7.407  | 2.963  | 11.111 | 0.741  |        |        |        | 2.963  | 4.444  | 3.704  | 4.444  |  |
| 665 A 50.370  | 50.37  | 5 | 50.37  |        |        | 2.222  |        |        | 6.667  |        |        |        |        | 11.852 |        | 13.333 | 2.963  | 12.593 |        |  |
| 666 F 55.556  | 55.556 | 5 | 0.741  |        | 55.556 |        |        |        | 6.667  | 7.407  | 7.407  |        |        |        |        | 6.667  | 1.481  | 12.593 | 1.481  |  |
| 667 N 31.111  | 31.111 | 3 | 7.407  | 0.741  |        | 1.481  |        |        | 1.481  | 5.185  | 6.667  | 31.111 | 15.556 | 7.407  |        | 11.111 | 4.444  | 7.407  |        |  |
| 668 P 60.150  | 60.15  | 4 | 0.752  |        |        | 3.759  |        |        | 3.008  |        | 23.308 | 5.263  |        |        | 60.15  | 1.504  | 0.752  | 1.504  |        |  |
| 669 P 93.333  | 93.333 | 8 | 4.444  |        |        |        |        |        |        |        |        |        |        |        | 93.333 | 0.741  | 1.481  |        |        |  |
| 670 A 45.926  | 45.926 | 6 | 45.926 | 0.741  | 5.926  |        | 0.741  |        |        |        |        |        |        |        | 27.407 |        | 15.556 | 3.704  |        |  |
| 671 I 57.778  | 57.778 | 8 | 0.741  |        |        | 0.741  |        |        | 57.778 |        | 17.037 | 0.741  |        |        |        |        |        | 22.963 |        |  |
| 672 P 28.148  | 28.148 | 1 | 0.741  | 11.111 | 2.963  |        | 0.741  |        | 5.185  | 5.926  | 3.704  | 2.222  | 28.148 | 10.37  | 3.704  | 7.407  | 5.185  | 12.593 |        |  |
| 673 G 57.037  | 57.037 | 7 | 0.741  | 2.963  | 31.852 |        | 57.037 |        |        |        |        | 1.481  |        | 0.741  |        | 2.222  | 2.963  |        |        |  |
| 674 L 71.852  | 71.852 | 7 | 2.963  |        |        | 0.741  | 8.148  | 2.222  |        | 71.852 | 4.444  | 0.775  | 0.775  |        |        | 6.667  | 2.222  |        | 0.741  |  |
| 675 G 88.372  | 88.372 | 7 |        | 0.775  | 3.101  |        | 88.372 |        |        |        | 0.775  |        |        |        |        | 4.651  | 0.775  | 0.775  |        |  |
| 676 T 36.567  | 36.567 | 4 | 0.746  | 1.493  | 2.985  |        | 10.448 | 0.746  | 0.746  | 1.493  | 0.746  | 17.164 |        | 10.448 | 1.493  | 12.687 | 36.567 | 2.985  |        |  |
| 677 A 32.836  | 32.836 | 6 | 32.836 |        |        | 2.239  | 20.149 | 5.224  | 0.746  | 1.493  |        | 1.493  |        | 2.239  |        | 24.627 | 8.955  |        |        |  |
| 678 S 23.134  | 23.134 | 5 | 7.463  | 1.493  |        | 2.985  | 21.642 |        | 11.194 | 1.493  |        |        | 6.716  | 3.731  |        | 23.134 | 20.149 |        |        |  |
|               |        |   |        |        |        |        |        |        |        |        |        |        |        |        |        |        |        |        |        |  |

|               |        |   |        |        |        |        |        |        |        |        |        |        |        |        |        |        |        |        |        |
|---------------|--------|---|--------|--------|--------|--------|--------|--------|--------|--------|--------|--------|--------|--------|--------|--------|--------|--------|--------|
| 686 D 68.148  | 68.148 | 8 | 6.667  | 68.148 | 0.741  |        | 0.741  |        | 2.963  |        |        |        |        |        |        |        | 19.259 |        |        |
| 687 R 35.556  | 35.556 | 4 | 0.741  |        |        |        |        |        | 5.185  | 12.593 | 3.704  | 8.889  |        |        | 17.037 | 35.556 | 2.963  | 2.222  | 2.222  |
| 688 G 31.111  | 31.111 | 1 | 30.37  |        | 2.222  |        | 31.111 |        |        |        |        | 2.963  | 0.741  |        | 3.704  | 0.741  | 16.296 | 11.111 | 0.741  |
| 689 G 51.111  | 51.111 | 2 | 9.63   | 4.444  |        |        | 51.111 |        | 0.741  |        |        |        |        | 20.741 | 5.926  | 0.741  | 6.667  |        |        |
| 690 L 37.037  | 37.037 | 1 | 11.852 | 2.222  | 0.741  | 0.741  | 6.667  |        | 0.741  | 2.963  | 37.037 | 2.222  | 4.444  |        | 11.111 | 8.148  | 0.741  | 4.444  | 5.926  |
| 691 G 67.407  | 67.407 | 5 |        | 12.593 | 2.963  |        | 67.407 |        |        |        |        |        | 2.963  |        | 2.222  | 1.481  | 6.667  | 2.963  |        |
| 692 H 41.481  | 41.481 | 5 | 2.222  |        | 1.481  | 7.407  |        | 41.481 | 0.741  | 0.741  | 2.222  | 0.741  |        |        | 5.926  | 1.481  | 7.407  | 2.963  | 2.222  |
| 693 E 36.296  | 36.296 | 1 | 13.333 | 18.519 | 36.296 |        |        | 3.704  | 0.741  |        | 2.963  |        |        | 1.481  | 3.704  | 5.185  | 3.704  | 5.185  | 0.741  |
| 694 A 33.333  | 33.333 | 1 | 33.333 | 4.444  | 14.074 |        |        | 2.963  |        | 20     |        |        |        | 0.741  | 3.704  | 8.889  | 2.222  | 5.926  | 3.704  |
| 695 L 91.852  | 91.852 | 8 | 0.741  |        |        | 0.741  |        |        |        | 4.444  | 91.852 | 1.481  |        |        |        |        |        |        | 0.741  |
| 696 T 17.037  | 17.037 | 1 | 11.111 | 1.481  | 1.481  | 5.926  |        |        | 2.963  | 4.444  | 16.296 | 16.296 | 0.741  |        | 5.926  | 0.741  | 2.222  | 17.037 | 5.185  |
| 697 A 28.889  | 28.889 | 1 | 28.889 | 6.667  | 14.074 |        | 2.222  |        |        | 7.407  | 0.741  |        | 6.667  |        | 25.185 | 2.963  | 2.222  | 2.222  | 0.741  |
| 698 A 59.259  | 59.259 | 6 | 59.259 | 0.741  | 3.704  | 1.481  |        |        | 2.222  | 2.963  | 2.963  | 0.741  |        | 0.741  | 2.963  | 1.481  | 4.444  | 14.074 | 2.222  |
| 699 R 48.148  | 48.148 | 6 | 20     |        | 1.481  |        | 1.481  |        | 1.481  |        | 2.222  | 5.926  |        |        | 2.963  | 48.148 | 2.222  | 8.148  | 5.926  |
| 700 N 42.963  | 42.963 | 4 | 3.704  | 16.296 | 8.889  | 0.741  |        | 2.222  |        | 0.741  | 0.741  | 42.963 |        |        | 15.556 | 0.741  | 2.963  | 3.704  | 0.741  |
| 701 Q 45.926  | 45.926 | 3 | 3.704  | 3.704  | 11.111 |        | 2.222  |        | 2.222  | 8.889  |        | 1.481  | 5.185  |        | 45.926 | 5.926  | 0.741  | 7.407  | 1.481  |
| 702 L 59.259  | 59.259 | 5 | 1.481  |        |        | 9.63   |        | 10.37  |        | 59.259 | 8.148  |        |        |        |        |        |        |        | 11.111 |
| 703 L 52.593  | 52.593 | 4 |        |        | 0.741  | 2.963  |        | 15.556 | 5.185  | 52.593 | 5.185  |        |        |        | 4.444  |        | 2.963  | 1.481  | 8.889  |
| 704 G 34.815  | 34.815 | 1 | 17.778 | 2.963  | 7.407  | 2.963  | 34.815 |        | 0.741  | 5.185  |        | 2.963  | 3.704  |        | 12.593 | 0.741  | 1.481  | 5.185  |        |
| 705 M 25.185  | 25.185 | 2 | 13.333 |        | 9.63   |        |        | 0.741  | 17.778 |        | 13.333 | 25.185 | 1.481  |        | 5.185  | 8.148  | 2.222  | 2.222  | 0.741  |
| 706 A 71.852  | 71.852 | 7 | 71.852 |        |        |        | 1.481  |        | 8.148  |        | 4.444  | 3.704  |        |        |        |        | 2.963  | 0.741  | 6.667  |
| 707 A 35.556  | 35.556 | 1 | 35.556 | 2.222  | 1.481  | 0.741  |        | 3.704  | 1.481  | 7.407  | 0.741  | 5.926  | 12.593 |        | 8.148  | 8.889  | 6.667  | 2.222  | 0.741  |
| 708 Q 44.444  | 44.444 | 3 | 7.407  |        | 8.889  |        | 2.963  | 0.741  |        | 21.481 |        | 0.741  | 5.185  |        | 44.444 | 0.741  | 2.222  | 3.704  |        |
| 709 S 33.333  | 33.333 | 4 | 1.481  |        | 11.111 | 3.704  | 0.741  | 14.815 |        | 1.481  | 0.741  |        | 14.074 |        | 0.741  | 6.667  | 33.333 | 4.444  | 2.222  |
| 710 P 60.741  | 60.741 | 2 |        | 1.481  | 2.222  |        | 19.259 | 0.741  |        | 8.889  |        |        |        | 60.741 | 1.481  | 1.481  | 3.704  |        |        |
| 711 D 16.296  | 16.296 | 1 | 6.667  | 16.296 | 13.333 |        | 5.926  | 0.741  | 5.926  | 11.852 | 8.148  | 2.222  | 3.704  |        | 7.407  | 6.667  | 3.704  | 0.741  | 6.667  |
| 712 L 29.167  | 29.167 | 1 |        |        |        |        | 4.167  |        |        |        | 29.167 | 25     |        |        | 4.167  |        | 4.167  | 16.667 | 16.667 |
| 713 L 62.963  | 62.963 | 7 | 0.741  |        |        | 23.704 |        |        | 3.704  |        | 62.963 | 2.963  |        |        |        |        | 0.741  | 5.185  |        |
| 714 TV 30.263 | 30.263 | 1 | 11.842 |        | 1.316  |        | 1.316  |        |        |        | 3.947  |        |        |        | 2.632  |        | 14.474 | 30.263 | 30.263 |
| 715 G 24.444  | 24.444 | 1 | 5.185  | 2.963  | 1.481  | 14.815 | 24.444 |        | 0.741  |        | 1.481  | 8.889  | 0.741  |        | 2.632  |        | 6.667  | 0.741  | 2.963  |
| 716 V 63.704  | 63.704 | 6 | 4.444  |        |        |        |        |        |        | 5.185  | 9.63   | 4.444  |        | 5.185  |        | 0.741  | 3.704  | 2.963  | 63.704 |
| 717 R 48.889  | 48.889 | 5 | 0.741  | 10.37  | 0.741  | 10.37  | 0.741  | 1.481  | 2.963  | 0.741  | 0.741  | 5.185  | 2.963  |        | 2.963  | 48.889 | 0.741  | 2.222  | 0.741  |
| 718 P 35.556  | 35.556 | 4 | 7.407  |        | 1.481  | 0.741  | 1.481  | 6.667  | 4.444  | 1.481  | 8.148  | 2.222  |        | 35.556 |        | 17.037 | 8.889  | 0.741  | 1.481  |
| 719 N 42.963  | 42.963 | 7 | 2.222  | 21.481 | 3.704  | 0.741  | 2.222  |        | 0.741  |        | 17.778 | 0.741  | 42.963 |        |        | 14.815 | 11.111 |        |        |
| 720 G 48.148  | 48.148 | 5 | 1.481  |        | 1.481  | 8.148  | 48.148 |        | 0.741  |        | 17.778 | 0.741  |        |        |        | 2.963  | 3.704  | 2.222  | 1.481  |
| 721 L 40.000  | 40     | 4 | 3.704  |        | 5.926  | 0.741  | 0.741  |        |        | 11.111 | 40     | 5.926  | 2.222  |        | 17.778 | 8.148  | 2.222  | 1.481  |        |
| 722 E 30.370  | 30.37  | 4 | 13.333 | 7.407  | 30.37  | 8.889  | 0.741  |        | 5.926  |        | 0.741  |        | 3.704  | 7.407  | 0.741  | 2.222  | 2.963  | 1.481  | 6.667  |
| 723 D 58.519  | 58.519 | 7 | 1.481  | 58.519 | 5.185  |        | 1.481  |        |        |        |        | 20.741 | 2.963  |        | 4.444  |        | 5.185  |        |        |
| 724 T 23.704  | 23.704 | 5 | 11.852 |        | 4.444  |        | 5.185  |        | 2.222  | 5.185  | 1.481  | 4.444  | 2.963  |        | 2.963  | 0.741  | 17.037 | 23.704 | 17.778 |
| 725 P 80.000  | 80     | 6 | 6.667  |        | 0.741  | 0.741  |        |        |        |        | 0.741  | 0.741  |        | 80     |        | 2.963  | 0.741  | 2.222  | 1.481  |
| 726 Q 70.370  | 70.37  | 7 |        | 0.741  | 6.667  |        | 0.741  | 0.741  |        | 1.481  | 0.741  |        | 1.481  |        | 70.37  | 3.704  | 5.185  | 3.704  |        |
| 727 L 35.556  | 35.556 | 3 | 2.222  |        |        | 15.556 |        |        | 5.926  |        | 35.556 | 6.667  |        |        |        | 0.741  | 2.222  | 12.593 | 18.519 |
| 728 KQ 21.481 | 21.481 | 1 | 2.222  | 9.63   | 5.926  | 0.741  |        | 3.704  |        | 21.481 | 1.481  |        | 5.926  |        | 21.481 | 15.556 | 1.481  | 4.444  | 2.222  |
| 729 L 37.037  | 37.037 | 4 | 8.889  |        | 0.741  |        |        |        |        | 31.111 | 37.037 | 0.741  |        |        |        |        |        | 20.741 | 0.741  |
| 730 D 41.481  | 41.481 | 1 | 2.222  | 41.481 | 12.593 |        |        | 5.185  | 3.704  | 7.407  | 1.481  |        | 5.926  | 0.741  | 2.963  | 2.222  | 7.407  | 2.963  | 0.741  |
| 731 I 69.630  | 69.63  | 7 |        |        |        | 0.741  |        |        | 69.63  |        | 5.926  |        |        |        |        |        |        | 23.704 |        |
| 732 D 90.370  | 90.37  | 8 |        |        | 90.37  |        |        |        |        | 0.741  |        |        | 8.889  |        |        |        |        |        |        |
| 733 R 52.593  | 52.593 | 7 | 0.741  |        | 5.185  | 0.741  |        | 2.222  |        | 5.185  | 2.222  |        | 1.481  | 0.741  | 24.444 | 52.593 | 0.741  | 0.741  | 2.963  |
| 734 E 42.963  | 42.963 | 2 | 12.593 | 12.593 | 42.963 |        |        | 0.741  | 0.741  | 0.741  | 0.741  |        | 5.926  |        | 3.704  | 9.63   | 1.481  | 3.704  | 4.444  |
| 735 K 80.741  | 80.741 | 7 | 2.222  |        |        |        |        |        | 0.741  | 80.741 | 2.222  |        |        |        | 8.148  | 5.926  |        |        |        |
| 736 A 88.148  | 88.148 | 8 |        |        |        |        |        |        | 1.481  |        | 2.963  | 0.741  |        |        |        |        |        |        | 6.667  |
| 737 Q 22.963  | 22.963 | 3 | 14.815 |        | 11.852 | 0.741  | 10.37  |        | 0.741  | 16.296 | 2.222  | 0.741  | 2.963  |        | 22.963 | 7.407  | 6.667  | 1.481  | 0.741  |
| 738 A 59.259  | 59.259 | 5 |        | 5.185  | 1.481  |        |        |        | 0.741  | 0.741  | 2.963  |        |        |        | 5.926  | 1.481  | 10.37  | 8.889  | 2.963  |
| 739 L 61.481  | 61.481 | 6 | 1.481  |        |        |        | 3.704  |        | 0.741  | 61.481 | 14.074 |        |        |        | 10.37  |        | 0.741  |        |        |
| 740 G 91.111  | 91.111 | 7 | 0.741  | 1.481  |        |        | 91.111 |        | 0.741  |        |        |        | 1.481  |        | 3.704  |        | 0.741  |        | 7.407  |
| 741 V 64.444  | 64.444 | 6 | 0.741  |        |        |        |        |        |        |        |        |        |        |        |        |        |        |        |        |
| 742 S 50.370  | 50.37  | 4 | 7.407  | 4.444  | 1.481  |        | 2.222  |        | 0.741  |        | 20.741 | 1.481  |        |        |        |        |        |        | 64.444 |
| 743 I 28.148  | 28.148 | 4 | 0.741  |        |        | 9.63   |        | 28.148 |        | 26.667 | 17.037 |        | 1.481  | 0.741  |        |        |        |        | 11.852 |
| 744 S 29.630  | 29.63  | 3 | 14.074 | 13.333 | 5.185  |        | 2.222  | 0.741  |        | 2.222  |        |        | 6.667  |        | 14.815 | 1.481  | 29.63  | 8.889  |        |
| 745 D 59.259  | 59.259 | 3 | 5.185  | 59.259 | 8.148  |        |        |        |        |        |        |        | 5.926  |        | 9.63   | 1.481  | 5.185  | 5.185  |        |
| 746 I 65.185  | 65.185 | 7 | 1.481  |        |        |        |        |        | 65.185 |        | 8.148  |        |        |        |        |        |        |        | 25.185 |
| 747 N 42.222  | 42.222 | 6 | 3.704  |        | 0.741  | 20.741 | 13.333 |        |        |        |        |        | 42.222 |        |        | 0.741  | 11.852 | 2.963  | 0.741  |
| 748 S 23.704  | 23.704 | 1 | 8.148  | 16.296 | 11.111 | 0.741  | 4.444  | 0.741  | 1.481  | 0.741  |        |        |        |        | 9.63   |        | 23.704 | 11.852 | 0.741  |
| 749 T 77.037  | 77.037 | 7 | 6.667  |        | 3.704  |        |        |        | 1.481  |        |        |        |        |        | 0.741  |        | 5.926  | 77.037 | 3.704  |
| 750 L 76.296  | 76.296 | 7 |        |        |        | 1.481  |        |        | 10.37  |        | 76.296 | 7.407  |        |        |        |        |        |        | 4.444  |
| 751 S 35.556  | 35.556 | 6 | 12.593 | 0.741  | 1.481  |        | 17.037 |        | 1.481  |        |        |        | 0.741  |        | 27.407 | 1.481  | 35.556 | 1.481  |        |
| 752 T 39.259  | 39.259 | 3 | 21.481 |        |        |        | 1.481  |        | 10.37  |        | 2.222  |        | 1.481  |        |        | 11.111 | 39.259 | 11.852 | 0.741  |
| 753 A 51.852  | 51.852 | 6 | 51.852 |        |        | 3.704  | 1.481  |        |        |        | 8.889  | 10.37  |        | 1.481  |        |        | 2.222  | 3.704  | 14.074 |
| 754 L 43.704  | 43.704 | 5 |        |        | 10.37  |        |        |        | 0.741  |        | 43.704 | 11.111 |        |        |        |        |        | 3.704  | 28.889 |

[illegible]

|              |        |  |   |        |  |        |        |       |        |       |        |        |        |        |       |       |        |        |        |        |
|--------------|--------|--|---|--------|--|--------|--------|-------|--------|-------|--------|--------|--------|--------|-------|-------|--------|--------|--------|--------|
| 824 S 51.852 | 51.852 |  | 7 | 42.963 |  |        |        |       |        |       |        |        |        |        |       |       | 51.852 | 5.185  |        |        |
| 825 A 29.630 | 29.63  |  | 5 | 29.63  |  |        |        | 5.926 |        | 8.148 | 25.926 |        |        |        |       |       | 1.481  | 0.741  | 21.481 |        |
| 826 E 42.963 | 42.963 |  | 4 | 2.222  |  | 8.148  | 42.963 | 2.222 | 0.741  |       |        |        |        |        |       |       | 3.704  | 11.111 | 0.741  | 3.704  |
| 827 I 69.630 | 69.63  |  | 7 |        |  |        |        | 69.63 |        |       | 22.222 | 0.741  |        |        |       |       |        |        | 6.667  |        |
| 828 Q 20.000 | 20     |  | 4 | 2.963  |  | 0.741  | 2.963  | 0.741 | 2.963  | 0.741 |        |        |        |        |       |       | 18.519 | 6.667  | 11.852 | 0.741  |
| 829 G 84.444 | 84.444 |  | 8 | 13.333 |  |        |        |       | 84.444 |       | 0.741  |        |        |        |       |       |        |        | 0.741  |        |
| 830 E 23.704 | 23.704 |  | 2 | 11.111 |  | 8.148  | 23.704 | 1.481 | 5.185  |       |        |        |        |        |       |       |        | 14.815 | 0.741  | 14.074 |
| 831 A 50.000 | 50     |  | 2 | 50     |  |        |        | 3.906 |        |       |        |        |        |        |       |       |        | 1.562  | 0.781  | 3.125  |
| 832 A 74.803 | 74.803 |  | 6 | 74.803 |  | 3.15   |        |       |        | 0.787 |        |        |        |        |       |       |        | 6.299  | 3.15   | 1.575  |
| 833 P 84.211 | 84.211 |  | 4 | 5.263  |  | 0.752  | 0.752  | 0.752 |        |       |        |        |        |        |       |       |        | 0.787  | 0.752  | 3.008  |
| 834 G 89.552 | 89.552 |  | 7 | 0.746  |  | 0.746  |        |       | 89.552 |       | 2.985  | 0.752  |        |        |       |       |        | 2.985  | 3.008  | 3.008  |
| 835 V 29.104 | 29.104 |  | 1 | 2.239  |  | 0.746  | 0.746  | 4.478 | 1.493  | 3.731 | 3.731  | 14.925 | 2.239  | 0.746  |       |       |        | 1.493  | 2.239  | 2.239  |
| 836 S 84.444 | 84.444 |  | 8 | 4.444  |  |        |        |       |        |       |        |        |        |        |       |       |        | 84.444 | 6.667  | 5.224  |
| 837 S 43.704 | 43.704 |  | 7 | 0.741  |  |        | 0.741  |       |        |       | 0.741  | 0.741  | 6.667  | 8.148  |       | 1.481 | 2.222  | 0.741  | 37.037 | 29.104 |
| 838 G 88.148 | 88.148 |  | 7 | 2.222  |  | 5.185  | 0.741  |       | 88.148 |       |        |        |        |        |       |       |        | 43.704 | 0.741  | 0.741  |
| 839 E 37.037 | 37.037 |  | 3 | 6.667  |  | 16.296 | 37.037 |       |        |       | 1.481  |        |        |        |       |       |        | 2.963  | 10.37  | 2.222  |
| 840 A 93.333 | 93.333 |  | 9 | 93.333 |  |        |        | 2.222 |        |       |        |        |        |        |       |       |        | 0.741  |        | 5.185  |
| 841 M 60.741 | 60.741 |  | 8 |        |  |        | 2.963  |       |        |       | 13.333 | 1.481  | 11.111 | 60.741 |       |       |        | 4.444  | 0.741  | 5.185  |
| 842 A 44.444 | 44.444 |  | 1 | 44.444 |  | 17.037 | 6.667  |       |        |       | 0.741  | 3.704  | 2.222  | 0.741  |       | 6.667 |        | 5.185  | 0.741  | 2.222  |
| 843 A 24.444 | 24.444 |  | 2 | 24.444 |  |        | 17.778 | 6.667 |        |       | 3.704  | 2.222  | 16.296 | 3.704  |       |       |        | 1.481  | 0.741  | 5.185  |
| 844 M 51.852 | 51.852 |  | 7 | 0.741  |  |        |        | 1.481 |        |       | 14.074 | 2.222  | 51.852 |        |       |       |        | 0.741  | 9.63   | 6.667  |
| 845 E 74.815 | 74.815 |  | 5 | 2.963  |  | 2.963  | 74.815 |       | 0.741  |       | 0.741  | 2.963  |        |        |       | 0.741 |        | 8.889  | 0.741  | 2.222  |
| 846 E 17.778 | 17.778 |  | 1 | 9.63   |  | 5.926  | 17.778 |       | 4.444  |       |        | 15.556 |        | 1.481  |       | 2.963 | 12.593 | 17.037 | 5.926  | 5.185  |
| 847 L 53.333 | 53.333 |  | 3 | 4.444  |  |        | 4.444  | 1.481 |        | 0.741 | 16.296 | 1.481  | 53.333 | 5.185  | 0.741 |       | 2.222  |        | 2.963  | 6.667  |
| 848 A 58.647 | 58.647 |  | 5 | 58.647 |  |        |        |       |        |       | 5.263  |        | 10.526 | 1.504  |       |       |        | 1.504  | 1.504  | 21.053 |
| 849 A 28.571 | 28.571 |  | 1 | 28.571 |  | 6.015  | 3.759  |       | 5.263  | 0.752 |        | 16.541 |        |        |       | 6.767 | 3.008  | 3.759  | 15.789 | 0.752  |

[illegible]

[illegible]

|                   |        |   |        |       |        |        |        |        |        |       |        |        |       |       |        |        |        |        |       |        |       |
|-------------------|--------|---|--------|-------|--------|--------|--------|--------|--------|-------|--------|--------|-------|-------|--------|--------|--------|--------|-------|--------|-------|
| 1031 R 48.889     | 48.889 | 1 | 2.222  |       | 2.222  | 2.963  |        | 7.407  | 1.481  |       | 15.556 |        |       | 1.481 |        | 1.481  | 48.889 | 9.63   | 5.926 |        | 0.741 |
| 1032 R 27.407     | 27.407 | 1 | 2.963  | 0.741 | 5.926  | 2.963  | 8.148  |        | 7.407  | 5.185 | 19.259 | 3.704  | 2.963 | 1.481 | 0.741  | 27.407 |        | 2.222  | 5.185 | 2.222  | 1.481 |
| 1033 F 43.704     | 43.704 | 5 | 3.704  |       | 1.481  | 0.741  | 43.704 | 1.481  | 14.074 | 0.741 | 4.444  | 4.444  | 0.741 |       | 3.704  | 7.407  | 4.444  |        | 8.889 |        |       |
| 1034 KS 14.925    | 14.925 | 1 | 4.478  |       | 2.985  | 14.179 |        | 11.194 | 2.239  | 1.493 | 14.925 | 2.239  | 1.493 | 11.94 | 4.478  | 6.716  | 14.925 | 6.716  |       |        |       |
| 1035 R 32.090     | 32.09  | 1 | 1.493  |       | 4.478  | 2.239  | 0.746  | 6.716  | 2.239  |       | 17.91  | 6.716  | 0.746 | 8.209 | 1.493  | 32.09  | 4.478  | 0.746  | 3.731 | 4.478  | 1.493 |
| 1036 K 34.091     | 34.091 | 1 | 1.515  |       | 2.273  | 3.788  | 3.03   | 2.273  | 4.545  | 3.03  | 34.091 | 11.364 | 0.758 | 2.273 | 1.515  | 2.273  | 16.667 | 5.303  | 1.515 | 3.03   | 0.758 |
| 1037 P 13.077     | 13.077 | 1 | 6.923  |       | 3.846  | 9.231  | 0.769  | 4.615  | 5.385  |       | 11.538 | 3.846  | 1.538 | 6.923 | 13.077 | 7.692  | 5.385  | 10.769 | 4.615 | 3.077  | 0.769 |
| 1038 E 19.380     | 19.38  | 1 | 14.729 |       | 6.202  | 19.38  | 0.775  | 3.876  | 3.876  | 0.775 | 10.853 | 1.55   | 1.55  | 5.426 | 3.101  | 13.178 | 3.876  | 5.426  | 4.651 |        | 0.775 |
| 1039 D 12.000     | 12     | 1 | 8      |       | 12     | 8      | 7.2    | 2.4    | 4.8    | 1.6   | 8.8    | 2.4    | 1.6   | 9.6   | 4.8    | 10.4   | 5.6    | 5.6    | 4     | 3.2    |       |
| 1040 A 15.238     | 15.238 | 1 | 15.238 |       | 5.714  | 11.429 |        | 5.714  | 0.952  | 6.667 | 7.619  | 3.81   | 1.905 | 2.857 | 3.81   | 5.714  | 7.619  | 6.667  | 5.714 | 7.619  | 0.952 |
| 1041 E 20.000     | 20     | 1 | 10     |       | 4      | 20     | 2      | 2      | 3      | 7     | 6      | 6      |       | 6     | 5      | 4      | 9      | 3      | 5     | 8      |       |
| 1042 AEHPS 10.784 | 10.784 | 1 | 10.784 |       | 5.882  | 10.784 | 0.98   | 3.922  | 10.784 | 0.98  | 5.882  | 0.98   | 1.961 | 3.922 | 10.784 | 5.882  | 4.902  | 10.784 | 4.902 | 3.922  | 1.961 |
| 1043 E 18.367     | 18.367 | 1 | 4.082  | 1.02  | 4.082  | 18.367 |        | 3.061  | 7.143  | 1.02  | 4.082  | 10.204 | 4.082 |       | 12.245 | 3.061  | 3.061  | 17.347 | 5.102 | 2.041  |       |
| 1044 H 17.778     | 17.778 | 1 | 11.111 |       | 5.556  | 12.222 |        | 2.222  | 17.778 | 1.111 | 10     | 6.667  | 1.111 | 3.333 |        | 6.667  | 2.222  | 6.667  | 5.556 | 7.778  |       |
| 1045 P 16.279     | 16.279 | 1 | 13.953 |       | 5.814  | 10.465 |        | 3.488  | 2.326  | 3.488 | 8.14   | 4.651  | 1.163 | 1.163 | 16.279 | 3.488  | 3.488  | 10.465 | 9.302 | 2.326  |       |
| 1046 SV 14.286    | 14.286 | 1 | 10.39  |       | 2.597  | 11.688 |        | 3.896  | 2.597  | 1.299 | 6.494  | 6.494  |       | 3.896 | 6.494  | 9.091  | 2.597  | 14.286 | 3.896 | 14.286 |       |
| 1047 E 25.000     | 25     | 1 | 6.818  |       | 22.727 | 25     |        | 9.091  | 9.091  | 2.273 | 2.273  | 2.273  |       |       | 2.273  | 2.273  |        | 4.545  | 6.818 |        | 4.545 |
| 1048 H 26.316     | 26.316 | 1 | 5.263  |       | 5.263  | 13.158 |        |        | 26.316 | 2.632 | 13.158 |        | 5.263 | 5.263 | 5.263  |        | 13.158 | 5.263  |       |        |       |
| 1049 H 43.243     | 43.243 | 1 | 10.811 |       |        | 5.405  | 2.703  | 5.405  | 43.243 |       | 2.703  | 8.108  |       | 2.703 | 8.108  | 2.703  | 8.108  | 2.703  | 5.405 |        |       |
